# Supplementary material for: A microglia clonal inflammatory disorder in Alzheimer’s disease
Source: eLife. 2025 Mar 14;13:RP96519. doi: 10.7554/eLife.96519 (PMC11908784; doi:10.7554/eLife.96519)
Supplement: Figure 1—figure supplement 1—source data 1. [file elife-96519-fig1-figsupp1-data1.xlsx]

## Sheet: A
Control <55 Male	Control <55 Female	Control >55 Male	Control >55 Female	AD Male	AD Female
0	46	64	67	66	69
0	2	69	69	68	66
0	6	73	74	64	68
20	17	73	76	82	67
30	20	74	81	65	70
35	35	74	67	68	66
45	52	77	69	67	92
	51	63	71	59	60
	54	72	63	56	64
	55	73	65	69	66
		74	68	54	68
			69	68	62
			70	69	70
			72	65	57
			73	67	54
			74	68	62
				67	57
				64	68
				63	63
				67	65
					67
					59
					69
					64
					61

## Sheet: B
Our series	32	33	42	43	44
Control	15.3846	56.4103	2.5641	20.5128	5.12821
AD	11.1111	24.4444	2.22222	40	22.2222
AD no P-SNV	9.09091	13.6364	4.54545	45.4545	27.2727
AD with P-SNV	13.0435	34.7826	0	34.7826	17.3913
BMC Neurology 2008, 8:9 doi:10.1186/1471-2377-8-9
AD patients			controls
ApoE alleles	Number	Percentage	ApoE alleles	Number	Percentage
4:4		0.152	4:4		0.023
4:3		0.423	4:3		0.2
4:2		0.066	4:2		0.04
3:3		0.282	3:3		0.558
3:2		0.074	3:2		0.17
2:2		0.03	2:2		0.07
Total	376	1.027	Total	561

## Sheet: C
Control						AD
NEUN	DN	PU1				NEUN	DN	PU1
35.5	42.6	5.15				23.9	52.8	3.47
30.9	53.9	3.19				27.3	45.4	4.42
38.5	50.3	5.13				47.1	25.3	3.1
21.9	55.4	5.54				50.8	25.5	4.71
31.4	51.3	10.4				44.6	34.2	4.77
48.6	34.5	7.62				53.9	28.4	2.67
70.8	16.1	4.25				76.2	15.5	2.24
60.8	23.1	1.85				25.4	38.5	6.88
39.7	47.3	3.16				40.3	35.7	5.58
57	30	2.12				31.6	39.8	3.39
31.4	58.2	4.4				43.5	36.4	4.54
38.5	46.6	4.85				61.2	22.8	2.43
64.6	22.5	1.01				59.2	28.3	2.89
58.3	31.5	2.99				60	28.3	3.47
49.6	29.3	4.88				35.8	44	5.61
48.8	34.1	3.45				69.2	19.2	2.22
56.5	26.6	3.05				77.8	12.8	1.37
47.4	37.4	1.09				47.9	24.1	3.4
46.1	39.1	1.04				29	38.1	7.06
33.2	55.5	3.88				25.5	46.1	3.95
30.7	54.5	4.16				24.5	40.6	4.85
46.3	39.8	4.76				53.6	26.5	3.52
46	40.7	3.64				23.9	49.7	8.87
55.3	32.4	2.28				53.1	34.1	2.08
60.3	25.9	2.18				52	33	2.13
31.2	60.5	2.82				47.4	26.2	2.04
63.4	27.6	2.26				25.1	50.1	8.66
46.7	43.4	2.53				63.5	18.5	2.92
49.3	39	2.5				57.5	23.6	1.79
38.9	45.9	3.74				20.5	49.4	10.2
19.3	63.1	6.52				30.8	53.6	5.01
29	59.3	3.81				32.5	46.9	6.72
48.5	37.7	2.47				30.2	51.6	5.92
27.8	57.7	3.99				44.4	38	2.22
33.3	41.9	2.18				55.1	24	7.68
31.6	53.9	2.99				29.4	40.8	6.5
62.6	27.9	2.32				61.4	25.1	2.31
50.9	38.4	1.55				40.1	39.4	3.84
32.3	55.3	4.19				30.8	52.5	7.39
52.7	39.3	3.34				18.4	46.2	7.81
45.9	36.8	5.19				31.9	42.3	5.17
31.9	55.6	3.87				60.7	17	1.56
30.7	54.8	5.09				51.4	32.5	2.66
31.6	53.2	3.01				19.6	58.3	6.31
36.6	44.8	3.26				48.8	29.3	4.7
30.8	57.4	5.92				33.5	40.3	2.89
54.6	27.4	1.44				30.2	48.1	2.04
47.2	36.1	3.14				45.7	36	2.36
21.1	65.9	4.67				29.5	50.7	6.04
35.5	46.9	4.11				39.4	20.2	2.21
45.8	34.5	1.8				16.4	12.7	8.58
32.5	47.9	8.1				21.6	54.3	7.11
47.8	34.8	4.9				18.2	55.4	6.61
67.9	21.8	2.07				40.8	39.4	1.8
61.7	25.6	2.7				28.9	53.8	8.08
23.3	58.4	5.64				34.8	33.8	3.31
52.5	36.6	2.95				28.1	40.6	5.22
41.7	40.2	5.37				34.3	38.9	1.96
48.3	30.1	9.15				35.2	40	4.27
59.2	26	3.8				51.4	18.5	5.08
22.7	55.2	12.3				21.4	50.3	5.64
21.2	56.1	11.5				37.6	48.7	5.25
21.9	55.9	15.6				58.1	31.2	1.64
						46.3	35.1	2.68
						49.8	32.4	1.89
						20.4	41.3	6.24
						24.8	54.8	5.16
						15.9	59.8	10.4
						24.5	52.3	3.04
						13	57.7	8.07
						24.5	51.5	6.18
						29.6	50.2	5.27
						42.9	42.5	5.12
						76	10.7	1.26
						22.1	52.1	9.41
						28.9	44.5	3.9
						46.9	21.1	4.03
						34.1	31.9	2.08
						36.1	40	2.87
						37.2	37.1	3.92
						42.2	22.4	2.88
						27.5	52.3	5.25
						39.9	37.1	4.02
						56.3	31.5	1.35
						45	39.2	1.36
						68	22.3	1.27
						22	50.8	6.57
						12.4	66.7	6.38
						29.1	53.1	4.22
						28.2	9.99	10.6
						32.3	43.9	5.4
						58.8	29.5	1.77
						32.6	53.7	5.22
						24.2	57	8.55
						36.3	47.7	2.69
						52.2	30.7	3.07
						34.6	52	1.49
						33.9	36.8	10.7
						28.6	33.5	8.28

## Sheet: I
Control							AD
NEUN	DN	PU1	Blood				NEUN	DN	PU1	Blood
2754	1450	1374	1165				320	165	150	811
947	1534	1342	2131				387	169	165	895
1496	1146	1659	1251				403	319	167	962
1428	1571	1262	1278				406	353	169	978
986	947	1448	869				418	372	179	1060
1591	1374	1128	1162				423	385	186	1102
1274	1982	1280	1346				426	412	332	1105
1217	1510	989	829				426	417	396	1137
1010	1495	1197	1100				426	420	403	1205
1428	1767	1485	1418				430	422	414	1221
1740	1120	1202	1037				445	423	415	1222
1544	1238	1104	993				449	430	420	1226
1328	1327	1152	1273				454	431	420	1234
1359	1289	1150	410				463	447	442	1236
1325	1237	1263	408				486	447	455	1242
377	1177	384	1258				522	450	457	1242
1452	362	1226	1278				637	497	476	1282
1055	1397	775	735				745	647	560	1283
1244	1396	1004	1455				800	678	567	1306
1008	1079	862	885				813	678	750	1422
1145	1162	1079	1189				837	686	798	1437
1058	948	1293	887				871	813	825	1444
1258	1245	1346	996				878	819	849	1496
978	1258	1289	1399				900	828	876	1497
1254	814	1059	1064				902	959	909	1541
1141	1081	1045	389				912	982	940	1619
1079	1286	1053	674				963	990	953	1716
1922	1030	1692					985	1006	954	1818
1127	1275	860					1006	1015	971
1380	1424	1209					1023	1046	975
1122	1287	1092					1097	1049	1004
1067	1100	1187					1103	1055	1010
1455	1455	1676					1109	1069	1024
1363	2137	1399					1133	1076	1032
1028	926	475					1143	1082	1032
462	1342	878					1162	1084	1052
2055	1037	1055					1166	1115	1057
1116	1122	1331					1170	1117	1067
1832	453	1443					1179	1118	1067
1531	1819	401					1185	1131	1077
1184	1344	1134					1195	1170	1103
1215	1466	1245					1207	1184	1126
1418	1435	1455					1220	1185	1135
1021	1315	875					1222	1188	1138
399	410	981					1225	1191	1144
888	1021	1088					1232	1230	1148
735	372	1247					1234	1253	1164
1229	388	1322					1236	1254	1165
1461	408	1229					1236	1255	1184
946	1170	2383					1238	1261	1184
1205	2082	1152					1257	1284	1192
1532	1132	953					1267	1285	1199
1550	846	1256					1288	1289	1220
1895	1278	1263					1295	1299	1220
1525	910	787					1312	1300	1233
885	496	974					1318	1310	1234
1060	983	756					1347	1311	1240
1696	1057	946					1359	1311	1256
996	1352	927					1367	1312	1276
1135	1532	1864					1382	1315	1281
1373	1322	1399					1393	1317	1292
2379	1596	1036					1393	1321	1304
1441	1550	225					1394	1322	1306
938	1229	237					1395	1344	1309
1257	1466	1381					1397	1344	1339
301	1895	1012					1408	1346	1346
320	2383	168					1452	1357	1351
1800	1460	163					1454	1364	1365
466	1525	1828					1454	1367	1394
410	1152	1107					1468	1369	1397
1336	1063	472					1472	1379	1405
269	1059	1772					1480	1393	1418
348	901	372					1487	1405	1420
1081	788	1249					1515	1409	1432
354	1493	1137					1523	1413	1432
335	887	382					1534	1421	1459
1028	914	389					1547	1423	1486
387	1017	989					1569	1436	1489
854	1844	409					1584	1439	1508
1105	774	1399					1592	1442	1537
444	782	1386					1601	1459	1540
407	281	419					1627	1461	1544
530	259	396					1641	1468	1545
1190	1419	418					1642	1468	1558
413	409	477					1644	1477	1564
1014	438	1201					1647	1485	1566
1209	1544	1229					1667	1491	1575
436	846	378					1677	1500	1589
410	471	415					1681	1518	1596
361	1770	404					1729	1528	1603
1191	403	340					1742	1537	1648
1548	1121	1948					1743	1555	1652
	1249						1772	1678	1667
	1206						1773	1688	1730
	1081						1815	1757	1734
	1137						1830	1815	1765
	360						1946	1824	1787
	944						1979	1862	1792
	442						2017	1927	1806
	951						2114	1945	1809
	854							2272	1888
	1399							2337
	1105
	1386
	376
	378
	432
	1033
	389
	437
	957
	1014
	1201
	1209
	1229
	505
	378
	412
	1318
	1230
