# Supplementary material for: A microglia clonal inflammatory disorder in Alzheimer’s disease
Source: eLife. 2025 Mar 14;13:RP96519. doi: 10.7554/eLife.96519 (PMC11908784; doi:10.7554/eLife.96519)
Supplement: Figure 1—source data 1. [file elife-96519-fig1-data1.xlsx]

## Sheet: Figure 1C
Patient ID	Sample ID	Cell type	nCells	SampleCells	% of cells	% Mean	SD
AD52	NBB_AD52_SPG	Astrocyte	43	9285	0.463113	1.11269	0.869458
AD52	NBB_AD52_HIP	Astrocyte	44	6869	0.640559
AD53	NBB_AD53_HIP	Astrocyte	44	9595	0.458572
AD34	NBB_AD34_HIP	Astrocyte	184	7562	2.43322
C11	NBB_C11_AG	Astrocyte	156	9949	1.568
AD52	NBB_AD52_SPG	Endothelial	28	9285	0.301562	0.639645	1.13327
AD52	NBB_AD52_HIP	Endothelial	10	6869	0.145582
AD53	NBB_AD53_HIP	Endothelial	7	9595	0.0729547
AD34	NBB_AD34_HIP	Endothelial	201	7562	2.65803
C11	NBB_C11_AG	Endothelial	2	9949	0.0201025
AD52	NBB_AD52_SPG	Microglia	8948	9285	96.3705	93.6468	2.85034
AD52	NBB_AD52_HIP	Microglia	6437	6869	93.7109
AD53	NBB_AD53_HIP	Microglia	9241	9595	96.3106
AD34	NBB_AD34_HIP	Microglia	6781	7562	89.672
C11	NBB_C11_AG	Microglia	9170	9949	92.1701
AD52	NBB_AD52_SPG	Oligodendrocyte	241	9285	2.59558	3.67734	1.86263
AD52	NBB_AD52_HIP	Oligodendrocyte	356	6869	5.1827
AD53	NBB_AD53_HIP	Oligodendrocyte	286	9595	2.98072
AD34	NBB_AD34_HIP	Oligodendrocyte	120	7562	1.58688
C11	NBB_C11_AG	Oligodendrocyte	601	9949	6.04081
AD52	NBB_AD52_SPG	OPC	22	9285	0.236941	0.867119	1.45277
AD52	NBB_AD52_HIP	OPC	19	6869	0.276605
AD53	NBB_AD53_HIP	OPC	15	9595	0.156331
AD34	NBB_AD34_HIP	OPC	262	7562	3.46469
C11	NBB_C11_AG	OPC	20	9949	0.201025
AD52	NBB_AD52_SPG	Pericyte/other	1	9285	0.0107701	0.0402807	0.0394433
AD52	NBB_AD52_HIP	Pericyte/other	1	6869	0.0145582
AD34	NBB_AD34_HIP	Pericyte/other	8	7562	0.105792
AD52	NBB_AD52_SPG	VLMC/other	2	9285	0.0215401
AD52	NBB_AD52_HIP	VLMC/other	2	6869	0.0291163
AD53	NBB_AD53_HIP	VLMC/other	2	9595	0.0208442
AD34	NBB_AD34_HIP	VLMC/other	6	7562	0.0793441
