# Supplementary material for: A microglia clonal inflammatory disorder in Alzheimer’s disease
Source: eLife. 2025 Mar 14;13:RP96519. doi: 10.7554/eLife.96519 (PMC11908784; doi:10.7554/eLife.96519)
Supplement: Figure 2—figure supplement 1—source data 1. [file elife-96519-fig2-figsupp1-data1.xlsx]

## Sheet: A
NEUN	DN	PU1	Blood
0.073	0	0.363	1.736
0.291	0	1.163	0
0	0	0.174	0
0	0.291	1.453	1.163
0.231	0.116	0.213	0
0	0.436	0.581	0
0	0.291	0.872	0
0	0.291	0.145	0
0	0	0.347	0.347
0	0	0	0
0.291	0.291	0.727	0.347
0.291	0.581	0.872	2.035
0.174	0.347	0.347	2.616
0	0.174	0	8.14
0	0.174	0.347	0.581
0	0.145	0.436	1.453
1.017	0.291	1.599	3.488
0	0	0	2.616
0	0.164	0.213	1.453
0.05	0.099	0.645	2.035
0	0.05	0.347	1.453
0.145	0.145	0.581	1.163
0.291	0.581	1.599	0.291
0.581	0.388	0.678	1.389
0	0	0.291	0.291
1.381	0.654	0.388	2.326
0.291	0.291	0.581	0.291
0	0.291	0	1.163
0	0	0.291	2.907
0.145	0.073	0.945	0
0.145	0.145	0.363	1.736
0.116	0.174	0.465	0.347
0.174	0.116	0.349	1.389
0	0	0	0
0.581	0.145	0.63	1.389
0.129	0.032	0.484	0.347
0.407	0.116	0.291	0.347
5.233	0.581	0.291	0
0.291	0.233	0	0
0.363	0.073	0.291	0.347
0.291	0.116	0.799	0
0.058	0	0	1.042
0.073	0.872	0.145	0.347
0.097	0.291	0.291	0.347
0	0	0.581	0.694
0	0.069	0.581	0.694
0	0	0.139	0.694
0	0.694	1.042	0.347
0.347	0.347	0.694	0.694
0.174	0.174	0.174	0
0.174	0	0	0
0	0.174	1.563	0.347
0.174	0	0.694	0.694
0	0	0.347	1.744
0	0	0.231	1.453
0.174	0.174	0.174	2.907
0	0	0.174	2.326
0	0.347	0.694	1.163
0.347	1.042	0.868	0.872
0.174	0.174	0.174	1.163
0	0.174	2.951	2.035
0	0	0.727	0
0	0.347	0	1.042
0	0	1.042	0
0	0	0.347	0.581
0.174	0.174	0.174	0
0	0.436	0.868
0	0	0.291
0	0.145	0
0.291	0.145	0.581
0	0	0.291
0	0.145	0.727
0.291	0	1.453
0	0.174	0.174
0.174	0	0
0	0	0.521
0	0	0.868
0	0	0.521
0	0	0.727
0	0.145	0.291
0	0	1.163
0.145	0.145	0.872
0	0.436	0.291
0.145	0	0.291
0	0.291	0
0.145	0.291	0.145349
0.145	0	0.291
0	0.581	0.436
0		0.291

## Sheet: B
ALL SNV. Mb -1 (per sample)											P-SNV. Mb -1 (per sample)
NeuN no-Cancer	NeuN Cancer	DN no-cancer	DN cancer	PU.1 no-cancer	PU.1 cancer	Blood no-cancer	Blood cancer				NeuN no-Cancer	NeuN Cancer	DN no-cancer	DN cancer	PU.1 no-cancer	PU.1 cancer	Blood no-cancer	Blood cancer
0	0	0	0	0.581	0.291	1.736	0				0	0	0	0	0	0	0	0
0	0	0	0.872	0	0.872	1.163	0				0	0	0	0	0	0	0	0
0.291	0	0	0.291	0.872	0.872	0	2.035				0.291	0	0	0	0	0.291	0	0.581
0	0	0	0	0	0.347	0	2.616				0	0	0	0	0	0	0	0.872
0	0	0.291	0.291	1.453	0	0	8.14				0	0	0	0	0	0	0	0.581
0	2.035	0.581	0.291	0.291	3.198	0.347	1.453				0	0	0	0	0	0	0	0
0	0	0	0	0	0.581		3.488				0	0	0	0	0	0		0
0	0.291	0	0.872	0	0.581		2.616				0	0	0	0	0	0		0
0.291	0	0.581	0.291	0.872	2.035		1.453				0	0	0	0	0.291	0.581		0.872
0.347	0.581	0.347	0	0.347	1.163		2.035				0	0	0	0	0	0		0.291
0	0.291	0.347	0	0.347	1.453		1.453				0	0	0	0.291	0	0		0.291
0	0.872	0.347	1.163	0	0		2.326				0	0	0	0	0	0		0.872
0	0.581	0	0	0.694	0.581		1.163				0	0	0	0	0	0		0.291
0	5.523	0.291	0.291	0.291	0.581		2.907				0	0	0.291	0	0	0		0
0	0	0	2.326	0.581	0.291						0	0	0	1.163	0	0
0	0	0	0	0	0.291						0	0	0	0	0	0
0	0	0.694	0.291	0.347	0.581						0	0	0.347	0	0	0
0	0.291	0	0	0.291	0						0	0	0	0	0	0
0	0	0	0.581	0	0						0	0	0	0	0	0
0	0	0.291	0	0.347	0.291						0	0	0	0	0	0
0	0	0	0	0.291	0.581						0	0	0	0	0	0
0	0.581	0	0	0	0.872						0	0	0	0	0	0
	0		0		1.744							0		0		0.581
	0		0.291		0.581							0		0		0
	0		0		0							0		0		0
	0.291		0		0.581							0		0		0
	0		0		0.291							0		0.581		0
	0		0.581		0.581							0		0		0.291
	0.291		0		0.872							0.291		0		0
	0		0		0							0		0		0
	0		0		0.581							0		0		0
	0.291		0		0							0		0		0
	0.291		0		0							0		0		0
	0.291		0.291		0.291							0		0		0.291
	0		0		0							0		0		0
	0		0		2.035							0		0		0.581
	0.291		0		0.581							0		0		0
	0		0		0.291							0		0		0
	5.233		0		0							0		0		0
	0.581		0		0.291							0		0		0
	0.581		0.872		1.163							0		0		0
	0		0.291		0							0		0		0
	0.291		0.291		0							0		0		0
	0.291		0		0.872							0		0		0
	0		0		1.163							0		0		0.291
	0.291		0		0.581							0		0		0.291
	0.581				0.581							0				0.291

## Sheet: C
P-SNV. Mb -1 (per sample)
Age-matched Controls				Alzheimer's disease
Frontal Cortex	Temporal Cortex	Parietal Cortex	Occipital Cortex	Frontal Cortex	Temporal Cortex	Parietal Cortex	Occipital Cortex
0	0	0	0	0.581		0	0.291
0	0	0	0	0.581		0	0.291
0	0.291	0.581	0			0
0	0.291	0				0.347
0	0	0				0
0	0	0				0
0	0	0.291				0.694
0.581		0				0.694
		0				0
		0				0
		0				0.347
		0				0
		0				0
		0				0.347
		0				0
		0				0
		0				0
		0.291				0
		0				0
		0				0
		0				0.347
		0				0
		0				0
		0.291				0.347
		0				0.291
		0				0
		0				0
		0				0
		0				0
						0
						0
						0
						0
						0
						0.347
						0.581
						0
						0.291
						0.291
						0
						0
						0
						0
						0.291
						0

## Sheet: D
	AD (1)	Age (in years)	SEX	Mut (1)
control29	0	69	1	0
AD61	1	92	0	1
AD62	1	82	1	1
AD18	1	67	1	0
AD19	1	69	0	1
AD20	1	54	1	0
AD21	1	62	0	0
AD22	1	66	0	0
AD23	1	68	0	1
AD24	1	70	0	1
AD25	1	65	1	0
AD26	1	67	0	1
AD27	1	68	1	0
AD28	1	57	0	0
AD29	1	68	1	1
AD30	1	60	0	1
AD31	1	54	0	0
AD32	1	59	0	0
AD33	1	68	1	0
AD34	1	59	1	0
AD35	1	67	1	1
AD36	1	64	1	1
AD37	1	69	1	1
AD38	1	62	0	1
AD39	1	65	1	1
AD40	1	57	0	0
AD41	1	64	0	0
AD42	1	66	1	0
AD43	1	68	0	1
AD44	1	67	1	1
AD45	1	61	0	0
AD46	1	63	0	0
AD47	1	64	0	1
AD48	1	65	0	0
AD49	1	69	0	1
AD50	1	70	0	1
AD51	1	63	1	0
AD52	1	67	1	1
AD53	1	68	1	1
AD54	1	66	0	0
AD55	1	66	0	0
AD56	1	56	1	0
AD57	1	69	1	1
AD58	1	67	0	0
AD59	1	64	1	1
AD60	1	68	0	1
control10	0	74	1	0
control12	0	68	0	0
control13	0	73	1	1
control14	0	69	0	0
control15	0	70	0	0
control16	0	65	0	0
control2	0	74	0	1
control3	0	63	0	0
contro6	0	72	0	0
control7	0	72	1	0
control8	0	63	0	0
control9	0	73	0	0
control18	0	74	1	0
control45	0	74	1	0
control37	0	74	0	1
control41	0	81	0	0
control30	0	73	1	0
control31	0	73	1	0
control21	0	71	0	0
control32	0	69	0	0
control38	0	67	0	1
control44	0	69	0	1
control33	0	67	0	1
control39	0	64	1	0
control40	0	76	0	0
control42	0	77	1	1

## Sheet: E
Donor	Status	AnatomicalLocation	BrainBank	CellType	Age	Sex	SNVburden	Predicted
AD61	NDD	HIP	French	PU.1	92	F	0.290698	0.421201
AD61	NDD	Cortex	French	PU.1	92	F	0.581395	0.421201
AD61	NDD	Cortex	French	PU.1	92	F	0.290698	0.421201
AD62	NDD	HIP	French	PU.1	82	M	0.290698	0.374342
AD62	NDD	Cortex	French	PU.1	82	M	0.581395	0.374342
AD62	NDD	Cortex	French	PU.1	82	M	0.290698	0.374342
control 37	CONTROL	Cortex	MSKCC	PU.1	74	F	0.581395	0.192278
control 37	CONTROL	CERE+BS	MSKCC	PU.1	74	F	0	0.192278
control 38	CONTROL	Cortex	MSKCC	PU.1	67	F	0	0.0997107
control 38	CONTROL	CERE+BS	MSKCC	PU.1	67	F	0	0.0997107
control 38	CONTROL	Cortex	MSKCC	PU.1	67	F	0.581395	0.0997107
control 38	CONTROL	Cortex	MSKCC	PU.1	67	F	0	0.0997107
control 39	CONTROL	Cortex	MSKCC	PU.1	64	M	0	-0.0219107
control 40	CONTROL	CERE+BS	MSKCC	PU.1	76	F	0	0.0307157
control 40	CONTROL	Cortex	MSKCC	PU.1	76	F	0	0.0307157
control 40	CONTROL	Cortex	MSKCC	PU.1	76	F	0	0.0307157
control 40	CONTROL	CERE+BS	MSKCC	PU.1	76	F	0	0.0307157
control 40	CONTROL	Cortex	MSKCC	PU.1	76	F	0	0.0307157
control 41	CONTROL	CERE+BS	MSKCC	PU.1	81	F	0	0.0667195
control 41	CONTROL	Cortex	MSKCC	PU.1	81	F	0	0.0667195
control 41	CONTROL	CERE+BS	MSKCC	PU.1	81	F	0	0.0667195
control 42	CONTROL	Cortex	MSKCC	PU.1	77	M	0	0.188
control 42	CONTROL	Cortex	MSKCC	PU.1	77	M	0.290698	0.188
control 42	CONTROL	Cortex	MSKCC	PU.1	77	M	0.290698	0.188
control 42	CONTROL	CERE+BS	MSKCC	PU.1	77	M	0.290698	0.188
control 44	CONTROL	Cortex	MSKCC	PU.1	69	F	0	0.0580983
control 44	CONTROL	CERE+BS	MSKCC	PU.1	69	F	0	0.0580983
control 44	CONTROL	Cortex	MSKCC	PU.1	69	F	0	0.0580983
control 44	CONTROL	Cortex	MSKCC	PU.1	69	F	0.290698	0.0580983
control 45	CONTROL	Cortex	MSKCC	PU.1	74	M	0	0.0426474
control 45	CONTROL	CERE+BS	MSKCC	PU.1	74	M	0	0.0426474
control18	CONTROL	HIP	NIH	PU.1	74	M	0	0.0210142
control18	CONTROL	Cortex	NIH	PU.1	74	M	0	0.0210142
control18	CONTROL	CERE+BS	NIH	PU.1	74	M	0	0.0210142
control18	CONTROL	CERE+BS	NIH	PU.1	74	M	0	0.0210142
control18	CONTROL	CERE+BS	NIH	PU.1	74	M	0	0.0210142
control18	CONTROL	Cortex	NIH	PU.1	74	M	0	0.0210142
control21	CONTROL	Cortex	NIH	PU.1	71	F	0	0.0249717
control21	CONTROL	HIP	NIH	PU.1	71	F	0	0.0249717
control29	CONTROL	HIP	French	PU.1	69	M	0	0.00870641
control29	CONTROL	Cortex	French	PU.1	69	M	0	0.00870641
control29	CONTROL	CERE+BS	French	PU.1	69	M	0	0.00870641
control29	CONTROL	Cortex	French	PU.1	69	M	0	0.00870641
control30	CONTROL	Cortex	MSKCC	PU.1	73	M	0	0.0292321
control30	CONTROL	CERE+BS	MSKCC	PU.1	73	M	0	0.0292321
control30	CONTROL	Cortex	MSKCC	PU.1	73	M	0	0.0292321
control31	CONTROL	Cortex	MSKCC	PU.1	73	M	0	0.0494933
control32	CONTROL	Cortex	MSKCC	PU.1	69	F	0	0.0177582
control33	CONTROL	CERE+BS	MSKCC	PU.1	67	F	0	0.080616
control33	CONTROL	Cortex	MSKCC	PU.1	67	F	0	0.080616
control33	CONTROL	Cortex	MSKCC	PU.1	67	F	0	0.080616
control33	CONTROL	Cortex	MSKCC	PU.1	67	F	0	0.080616
control33	CONTROL	CERE+BS	MSKCC	PU.1	67	F	0	0.080616
control33	CONTROL	CERE+BS	MSKCC	PU.1	67	F	0.290698	0.080616
control33	CONTROL	CERE+BS	MSKCC	PU.1	67	F	0	0.080616
control33	CONTROL	CERE+BS	MSKCC	PU.1	67	F	0.581395	0.080616
control33	CONTROL	Cortex	MSKCC	PU.1	67	F	0	0.080616
NBB_AD18	NDD	HIP	NBB	PU.1	67	M	0	0.0468619
NBB_AD18	NDD	HIP	NBB	PU.1	67	M	0	0.0468619
NBB_AD18	NDD	Cortex	NBB	PU.1	67	M	0	0.0468619
NBB_AD18	NDD	Cortex	NBB	PU.1	67	M	0	0.0468619
NBB_AD18	NDD	Cortex	NBB	PU.1	67	M	0	0.0468619
NBB_AD19	NDD	HIP	NBB	PU.1	69	F	0	0.18419
NBB_AD19	NDD	Cortex	NBB	PU.1	69	F	0.347222	0.18419
NBB_AD20	NDD	HIP	NBB	PU.1	54	M	0	0.00868397
NBB_AD21	NDD	HIP	NBB	PU.1	62	F	0	0.0535843
NBB_AD21	NDD	Cortex	NBB	PU.1	62	F	0	0.0535843
NBB_AD22	NDD	HIP	NBB	PU.1	66	F	0	0.0771519
NBB_AD22	NDD	Cortex	NBB	PU.1	66	F	0	0.0771519
NBB_AD23	NDD	HIP	NBB	PU.1	68	F	0.694444	0.446387
NBB_AD23	NDD	Cortex	NBB	PU.1	68	F	0.694444	0.446387
NBB_AD24	NDD	HIP	NBB	PU.1	70	F	0.347222	0.368808
NBB_AD24	NDD	Cortex	NBB	PU.1	70	F	0.694444	0.368808
NBB_AD25	NDD	HIP	NBB	PU.1	65	M	0	0.07126
NBB_AD25	NDD	Cortex	NBB	PU.1	65	M	0	0.07126
NBB_AD26	NDD	HIP	NBB	PU.1	67	F	0.347222	0.208189
NBB_AD26	NDD	Cortex	NBB	PU.1	67	F	0	0.208189
NBB_AD26	NDD	Cortex	NBB	PU.1	67	F	0.347222	0.208189
NBB_AD27	NDD	HIP	NBB	PU.1	68	M	0	0.0889357
NBB_AD27	NDD	Cortex	NBB	PU.1	68	M	0	0.0889357
NBB_AD28	NDD	HIP	NBB	PU.1	57	F	0	0.0241247
NBB_AD28	NDD	Cortex	NBB	PU.1	57	F	0	0.0241247
NBB_AD29	NDD	HIP	NBB	PU.1	68	M	0.347222	0.267661
NBB_AD29	NDD	Cortex	NBB	PU.1	68	M	0.347222	0.267661
NBB_AD30	NDD	HIP	NBB	PU.1	60	F	0.347222	0.131163
NBB_AD30	NDD	Cortex	NBB	PU.1	60	F	0	0.131163
NBB_AD31	NDD	HIP	NBB	PU.1	54	F	0	0.00644902
NBB_AD31	NDD	Cortex	NBB	PU.1	54	F	0	0.00644902
NBB_AD32	NDD	HIP	NBB	PU.1	59	F	0	0.0359085
NBB_AD32	NDD	Cortex	NBB	PU.1	59	F	0	0.0359085
NBB_AD33	NDD	HIP	NBB	PU.1	68	M	0	0.0889357
NBB_AD33	NDD	Cortex	NBB	PU.1	68	M	0	0.0889357
NBB_AD34	NDD	HIP	NBB	PU.1	59	M	0	0.0285586
NBB_AD34	NDD	Cortex	NBB	PU.1	59	M	0	0.0285586
NBB_AD34	NDD	Cortex	NBB	PU.1	59	M	0	0.0285586
NBB_AD35	NDD	HIP	NBB	PU.1	67	M	0.347222	0.261769
NBB_AD35	NDD	Cortex	NBB	PU.1	67	M	0.347222	0.261769
NBB_AD36	NDD	HIP	NBB	PU.1	64	M	0.347222	0.154731
NBB_AD36	NDD	Cortex	NBB	PU.1	64	M	0	0.154731
NBB_AD37	NDD	HIP	NBB	PU.1	69	M	0.347222	0.18419
NBB_AD37	NDD	Cortex	NBB	PU.1	69	M	0	0.18419
NBB_AD38	NDD	HIP	NBB	PU.1	62	F	0.694444	0.321673
NBB_AD38	NDD	Cortex	NBB	PU.1	62	F	0.347222	0.321673
NBB_AD39	NDD	HIP	NBB	PU.1	65	M	0	0.146075
NBB_AD39	NDD	Cortex	NBB	PU.1	65	M	0.290698	0.146075
NBB_AD40	NDD	HIP	NBB	PU.1	57	F	0	0.0241247
NBB_AD40	NDD	Cortex	NBB	PU.1	57	F	0	0.0241247
NBB_AD41	NDD	HIP	NBB	PU.1	64	F	0	0.0653681
NBB_AD41	NDD	Cortex	NBB	PU.1	64	F	0	0.0653681
NBB_AD42	NDD	HIP	NBB	PU.1	66	M	0	0.0771519
NBB_AD42	NDD	Cortex	NBB	PU.1	66	M	0	0.0771519
NBB_AD43	NDD	HIP	NBB	PU.1	68	F	0.290698	0.163751
NBB_AD43	NDD	Cortex	NBB	PU.1	68	F	0	0.163751
NBB_AD44	NDD	HIP	NBB	PU.1	67	M	0.581395	0.232675
NBB_AD44	NDD	Cortex	NBB	PU.1	67	M	0	0.232675
NBB_AD45	NDD	HIP	NBB	PU.1	61	F	0	0.0476924
NBB_AD45	NDD	Cortex	NBB	PU.1	61	F	0	0.0476924
NBB_AD46	NDD	HIP	NBB	PU.1	63	F	0	0.0594762
NBB_AD46	NDD	Cortex	NBB	PU.1	63	F	0	0.0594762
NBB_AD47	NDD	HIP	NBB	PU.1	64	F	0.347222	0.154731
NBB_AD47	NDD	Cortex	NBB	PU.1	64	F	0	0.154731
NBB_AD48	NDD	HIP	NBB	PU.1	65	F	0	0.07126
NBB_AD48	NDD	Cortex	NBB	PU.1	65	F	0	0.07126
NBB_AD49	NDD	HIP	NBB	PU.1	69	F	0.347222	0.273553
NBB_AD49	NDD	Cortex	NBB	PU.1	69	F	0.347222	0.273553
NBB_AD50	NDD	HIP	NBB	PU.1	70	F	0.581395	0.399981
NBB_AD50	NDD	Cortex	NBB	PU.1	70	F	0.581395	0.399981
NBB_AD51	NDD	HIP	NBB	PU.1	63	M	0	0.0594762
NBB_AD51	NDD	Cortex	NBB	PU.1	63	M	0	0.0594762
NBB_AD52	NDD	HIP	NBB	PU.1	67	M	0.290698	0.232675
NBB_AD52	NDD	Cortex	NBB	PU.1	67	M	0.290698	0.232675
NBB_AD53	NDD	HIP	NBB	PU.1	68	M	0.581395	0.313382
NBB_AD53	NDD	Cortex	NBB	PU.1	68	M	0.290698	0.313382
NBB_AD54	NDD	HIP	NBB	PU.1	66	F	0	0.0771519
NBB_AD54	NDD	Cortex	NBB	PU.1	66	F	0	0.0771519
NBB_AD55	NDD	HIP	NBB	PU.1	66	F	0	0.0771519
NBB_AD55	NDD	Cortex	NBB	PU.1	66	F	0	0.0771519
NBB_AD56	NDD	HIP	NBB	PU.1	56	M	0	0.0245515
NBB_AD57	NDD	HIP	NBB	PU.1	69	M	0.290698	0.169643
NBB_AD57	NDD	Cortex	NBB	PU.1	69	M	0	0.169643
NBB_AD58	NDD	HIP	NBB	PU.1	67	F	0	0.0830438
NBB_AD58	NDD	Cortex	NBB	PU.1	67	F	0	0.0830438
NBB_AD59	NDD	HIP	NBB	PU.1	64	M	0	0.140183
NBB_AD59	NDD	Cortex	NBB	PU.1	64	M	0.290698	0.140183
NBB_AD60	NDD	HIP	NBB	PU.1	68	F	0.290698	0.163751
NBB_AD60	NDD	Cortex	NBB	PU.1	68	F	0	0.163751
NBB_C10	CONTROL	Cortex	NBB	PU.1	74	M	0	0.0574271
NBB_C12	CONTROL	Cortex	NBB	PU.1	68	F	0	0.00729595
NBB_C12	CONTROL	Cortex	NBB	PU.1	68	F	0	0.00729595
NBB_C13	CONTROL	Cortex	NBB	PU.1	73	M	0.290698	0.150236
NBB_C14	CONTROL	Cortex	NBB	PU.1	69	F	0	0.0131879
NBB_C14	CONTROL	Cortex	NBB	PU.1	69	F	0	0.0131879
NBB_C15	CONTROL	Cortex	NBB	PU.1	70	F	0	0.025692
NBB_C16	CONTROL	Cortex	NBB	PU.1	65	F	0	-0.0139769
NBB_C2	CONTROL	Cortex	NBB	PU.1	74	F	0.290698	0.15817
NBB_C3	CONTROL	Cortex	NBB	PU.1	63	F	0	-0.0221636
NBB_C3	CONTROL	Cortex	NBB	PU.1	63	F	0	-0.0221636
NBB_C6	CONTROL	Cortex	NBB	PU.1	72	F	0	0.0308636
NBB_C6	CONTROL	Cortex	NBB	PU.1	72	F	0	0.0308636
NBB_C7	CONTROL	Cortex	NBB	PU.1	72	M	0	0.0308636
NBB_C7	CONTROL	Cortex	NBB	PU.1	72	M	0	0.0308636
NBB_C8	CONTROL	Cortex	NBB	PU.1	63	F	0	-0.0221636
NBB_C8	CONTROL	Cortex	NBB	PU.1	63	F	0	-0.0221636
NBB_C9	CONTROL	Cortex	NBB	PU.1	73	F	0	0.0494933

## Sheet: G
P-SNV. Mb -1 sample-2								P-SNV. Mb -1 patient-2
NEUN CTRL	NEUN AD	DN CTRL	DN AD	PU1 CTRL	PU1 AD			NEUN CTR	NEUN AD	DN CTRL	DN AD	PU1 CTRL	PU1 AD
0	0	0	0	0	0			0	0	0	0	0	0
0	0	0	0	0	0			0	0	0	0	0	0
0	0	0	0	0	0			0	0	0	0	0	0
0	0	0	0	0	0			0	0	0	0	0	0
0	0	0	0	0	0			0	0	0	0	0	0
0	0	0	0	0	0			0	0	0	0	0	0
0	0	0	0	0	0			0	0	0	0	0	0
0	0	0	0	0	0			0	0	0	0	0	0
0	0	0	0	0	0			0	0	0	0	0	0
0	0	0	0	0	0			0	0	0	0	0	0
0	0	0	0	0	0			0	0	0	0	0	0
0	0	0	0	0	0			0	0	0	0	0	0
0	0	0	0	0	0			0	0	0	0	0	0
0	0	0	0	0	0			0	0	0	0	0	0
0	0	0	0	0	0			0	0	0	0	0	0
0	0	0	0	0	0			0	0	0	0	0	0
0	0	0	0	0	0			0	0	0	0	0	0
0	0	0	0	0	0			0	0	0	0	0	0
0	0	0	0	0	0			0	0	0	0	0	0
0	0	0	0	0	0			0	0	0	0	0	0
0	0	0	0	0	0			0	0	0	0	0	0
0	0	0	0	0	0			0	0	0	0	0	0
0	0	0	0	0	0			0	0	0	0	0	0
0	0	0	0	0	0			0	0	0	0	0.021	0
0	0	0	0	0	0			0	0	0	0	0	0
0	0	0	0	0	0			0	0	0	0	0	0
0	0	0	0	0	0			0	0	0	0	0.218	0
0	0	0	0	0	0				0	0	0		0
0	0	0	0	0	0				0	0	0		0
0	0	0	0	0	0				0	0	0		0
0	0	0	0	0	0				0		0		0
0	0	0	0	0	0				0		0		0
0	0	0	0	0	0				0		0		0
0	0	0	0	0	0				0		0		0
0	0	0	0	0	0				0		0		0
0	0	0	0	0	0				0		0		0
0	0	0	0	0	0				0		0		0
0	0	0	0	0	0				0		0		0
0	0	0	0	0	0				0		0		0
0	0	0	0	0	0				0		0		0
0	0	0	0	0	0				0		0		0
0	0	0	0	0	0				0		0		0
0	0	0	0	0	0				0		0		0
0	0	0	0	0	0				0		0		0
0	0	0	0	0	0				0		0		0
0	0	0	0	0	0
0	0	0	0	0	0
0	0	0	0	0	0
0	0	0	0	0	0
0	0	0	0	0	0
0	0	0	0	0	0
0	0	0	0	0	0
0	0	0	0	0	0
0	0	0	0	0	0
0	0	0	0	0	0
0	0	0	0	0	0
0	0	0	0	0	0
0	0	0	0	0	0
0	0	0	0	0	0
0	0	0	0	0	0
0	0	0	0	0	0
0	0	0	0	0	0
0	0	0	0	0	0
0	0	0	0	0	0
0	0	0	0	0	0
0	0	0	0	0	0
0	0	0	0	0	0
0	0	0	0	0	0
0	0		0		0
	0		0		0
	0		0		0
	0		0		0
	0		0		0
	0		0		0
	0		0		0
	0		0		0
	0		0		0
	0		0		0
	0		0		0
	0		0		0
	0		0		0
	0		0		0
	0		0		0
	0		0		0
	0		0		0
	0		0		0
	0		0		0
	0		0		0
	0		0		0
	0		0		0
	0		0		0
	0		0		0
	0		0		0
	0		0		0
			0		0
			0
			0
