# Supplementary material for: A microglia clonal inflammatory disorder in Alzheimer’s disease
Source: eLife. 2025 Mar 14;13:RP96519. doi: 10.7554/eLife.96519 (PMC11908784; doi:10.7554/eLife.96519)
Supplement: Figure 2—source data 1. [file elife-96519-fig2-data1.xlsx]

## Sheet: Figure 2A
Figure 2A			ALL-SNV . Mb-1 (per donor)
	Patient ID	Age	NEUN	DN	PU1	Blood
	control 28	0	0.097	0.872	0.291
	control 23	0	0.073	0	0.145
	control 27	0	0.058	0.116	0
	control 42	77	0.363	0.509	0.727	2.907
	control 40	76	0.436	0.698	0.756	1.163
	control 43	46	0.291	0.581	0
	control 39	64	5.233		0.436
	control 36	20	0.407	0.116	0.291	0.291
	control 33	67	0.42	0.097	0.484	2.326
	control 35	35	0.484	0.048	0.63	0.291
	control 22	20	0.145	0.145	0	1.389
	control 34	35	0.174	0.174	0.349	0.291
	control 25	17	0.233	0.116	0.465	1.163
	control 44	69	0.145	0.291	0.872	1.453
	control 38	67	0.073	0.073	0.436	2.035
	control 32	69	0	0	0.291	1.453
	control 21	71	0.145	0.436	0.291	2.616
	control 31	73	0.291	0.291	0.581	3.488
	control 30	73	1.381	0.654	0.388	1.453
	control 24	6	0	0.145	1.017	0.581
	control 41	81	0.484	0.097	0.678	8.14
	control 37	74	0.291	0.291	0.581	2.616
	control 45	74	0.291	0.145	0.436	2.035
	control 20	2	0	0.05	0.347	0.347
	control 19	30	0.05	0.099	0.645	0
	control 18	74	0	0.164	0.213	0.347
	control 9	73	0	0	0	0
	control 8	63	1.017	0.291	1.599	0
	control 7	72	0	0.145	0.436	0
	contro 6	72	0	0.174	0.347	0
	control 5	51	0	0.174	0
	control 3	63	0.174	0.347	0.347
	control 2	74	0.291	0.581	0.872
	control 17	55	0.291	0.291	0.727
	control 16	65	0	0	0
	control 15	70	0	0	0.347
	control 14	69	0	0.291	0.145	1.163
	control 13	73	0	0.291	0.872	0
	control 12	68	0	0.436	0.581
	control 11	54	0.231	0.116	0.213	0
	control 10	74	0	0.291	1.453	1.736
	control 1	45	0	0	0.174
	AD60	68	0	0.581	0.291	0
	AD59	64	0	0	0.436	0.581
	AD58	67	0.145	0.291	0.291
	AD57	69	0.145	0.291	0.145	0
	AD56	56	0	0	0	1.042
	AD55	66	0.145	0.436	0.291
	AD54	66	0	0.145	0.291	0
	AD53	68	0.145	0	0.872	2.035
	AD52	67	0	0.145	1.163	1.163
	AD51	63	0	0	0.291	0.872
	AD50	70	0	0	0.727	1.163
	AD49	69	0	0	0.521	2.326
	AD48	65	0	0	0.868	2.907
	AD47	64	0	0	0.521	1.453
	AD46	63	0.174	0.174	0	1.744
	AD45	61	0	0	0.174	0.694
	AD44	67	0.291	0.145	1.453	0.347
	AD43	68	0	0	0.727	0
	AD42	66	0	0.145	0.291	0
	AD41	64	0.291	0.145	0.581	0.694
	AD40	57	0	0	0	0.347
	AD39	65	0	0.436	0.291	0.694
	AD38	62	0	0.174	0.868
	AD37	69	0.174	0	0.174	0.694
	AD36	64	0	0	0.347	0.694
	AD35	67	0	0.347	1.042	0.347
	AD34	59	0	0	0
	AD33	68	0	0.174	0.727	0.347
	AD32	59	0	0.174	2.951	1.042
	AD31	54	0.174	1.042	0.174	0
	AD30	60	0.347	0.347	0.868	0.347
	AD29	68	0	0	0.694
	AD28	57	0	0.174	0.174	0
	AD27	68	0.174	0	0.174	0
	AD26	67	0	0	0.231	0.347
	AD25	65	0	0	0.347	0.347
	AD24	70	0.174	0.174	0.694	1.389
	AD23	68	0	0	1.563	0
	AD22	66	0.174	0.174	0	1.389
	AD21	62	0.174	0.347	0.174	0.347
	AD20	54	0.347	0.694	0.694
	AD19	69	0	0	1.042	1.736
	AD18	67	0	0.069	0.139	0
	AD62	82	0	0	0.581
	AD61	92	0	0.291	0.581
	control26	52	0.291	0	1.163
	control29	69	0.073	0	0.363

## Sheet: Figure 2B
disease	cellType	Age	Sex	Patient ID	SNV. Mb -1 (per donor)
CONTROL	PU1	69	male	control29	0.363372
CONTROL	NEUN	69	male	control29	0.0726744
CONTROL	DN	69	male	control29	0
CONTROL	PU1	74	Male	NBB_C10	1.45349
CONTROL	NEUN	74	Male	NBB_C10	0
CONTROL	DN	74	Male	NBB_C10	0.290698
CONTROL	Blood	74	Male	NBB_C10	1.73611
CONTROL	PU1	68	Female	NBB_C12	0.581395
CONTROL	NEUN	68	Female	NBB_C12	0
CONTROL	DN	68	Female	NBB_C12	0.436047
CONTROL	PU1	73	Male	NBB_C13	0.872093
CONTROL	NEUN	73	Male	NBB_C13	0
CONTROL	DN	73	Male	NBB_C13	0.290698
CONTROL	Blood	73	Male	NBB_C13	0
CONTROL	DN	69	Female	NBB_C14	0.290698
CONTROL	NEUN	69	Female	NBB_C14	0
CONTROL	PU1	69	Female	NBB_C14	0.145349
CONTROL	Blood	69	Female	NBB_C14	1.16279
CONTROL	PU1	70	Female	NBB_C15	0.347222
CONTROL	NEUN	70	Female	NBB_C15	0
CONTROL	DN	70	Female	NBB_C15	0
CONTROL	PU1	65	Female	NBB_C16	0
CONTROL	DN	65	Female	NBB_C16	0
CONTROL	NEUN	65	Female	NBB_C16	0
CONTROL	PU1	74	Female	NBB_C2	0.872093
CONTROL	NEUN	74	Female	NBB_C2	0.290698
CONTROL	DN	74	Female	NBB_C2	0.581395
CONTROL	NEUN	63	Female	NBB_C3	0.173611
CONTROL	DN	63	Female	NBB_C3	0.347222
CONTROL	PU1	63	Female	NBB_C3	0.347222
CONTROL	NEUN	72	Female	NBB_C6	0
CONTROL	DN	72	Female	NBB_C6	0.173611
CONTROL	PU1	72	Female	NBB_C6	0.347222
CONTROL	Blood	72	Female	NBB_C6	0
CONTROL	DN	72	male	NBB_C7	0.145349
CONTROL	NEUN	72	male	NBB_C7	0
CONTROL	PU1	72	male	NBB_C7	0.436047
CONTROL	Blood	72	male	NBB_C7	0
CONTROL	DN	63	Female	NBB_C8	0.290698
CONTROL	PU1	63	Female	NBB_C8	1.59884
CONTROL	NEUN	63	Female	NBB_C8	1.01744
CONTROL	Blood	63	Female	NBB_C8	0
CONTROL	PU1	73	Female	NBB_C9	0
CONTROL	NEUN	73	Female	NBB_C9	0
CONTROL	DN	73	Female	NBB_C9	0
CONTROL	Blood	73	Female	NBB_C9	0
CONTROL	PU1	74	Male	control18	0.21264
CONTROL	NEUN	74	Male	control18	0
CONTROL	DN	74	Male	control18	0.16419
CONTROL	Blood	74	Male	control18	0.347222
CONTROL	PU1	74	male	control 45	0.581395
CONTROL	NEUN	74	male	control 45	0.145349
CONTROL	DN	74	male	control 45	0.145349
CONTROL	Blood	74	male	control 45	2.03488
CONTROL	DN	74	female	control 37	0.581395
CONTROL	PU1	74	female	control 37	1.59884
CONTROL	NEUN	74	female	control 37	0.290698
CONTROL	Blood	74	female	control 37	2.61628
CONTROL	PU1	81	female	control 41	0.678295
CONTROL	NEUN	81	female	control 41	0.581395
CONTROL	DN	81	female	control 41	0.387597
CONTROL	Blood	81	female	control 41	8.13953
CONTROL	NEUN	73	male	control30	1.38081
CONTROL	DN	73	male	control30	0.65407
CONTROL	PU1	73	male	control30	0.387597
CONTROL	Blood	73	male	control30	1.45349
CONTROL	PU1	73	male	control31	0.581395
CONTROL	NEUN	73	male	control31	0.290698
CONTROL	DN	73	male	control31	0.290698
CONTROL	Blood	73	male	control31	3.48837
CONTROL	PU1	71	Female	control21	0
CONTROL	NEUN	71	Female	control21	0
CONTROL	DN	71	Female	control21	0.290698
CONTROL	Blood	71	Female	control21	2.61628
CONTROL	PU1	69	Female	control32	0.290698
CONTROL	NEUN	69	Female	control32	0
CONTROL	DN	69	Female	control32	0
CONTROL	Blood	69	Female	control32	1.45349
CONTROL	PU1	67	female	control 38	0.944767
CONTROL	NEUN	67	female	control 38	0.145349
CONTROL	DN	67	female	control 38	0.0726744
CONTROL	Blood	67	female	control 38	2.03488
CONTROL	PU1	69	female	control 44	0.363372
CONTROL	NEUN	69	female	control 44	0.145349
CONTROL	DN	69	female	control 44	0.145349
CONTROL	Blood	69	female	control 44	1.45349
CONTROL	NEUN	67	Female	control33	0.129199
CONTROL	PU1	67	Female	control33	0.484496
CONTROL	DN	67	Female	control33	0.0322997
CONTROL	Blood	67	Female	control33	2.32558
CONTROL	PU1	64	male	control 39	0.290698
CONTROL	NEUN	64	male	control 39	5.23256
CONTROL	PU1	76	female	control 40	0.290698
CONTROL	NEUN	76	female	control 40	0.363372
CONTROL	DN	76	female	control 40	0.232558
CONTROL	Blood	76	female	control 40	1.16279
CONTROL	NEUN	77	male	control 42	0.290698
CONTROL	DN	77	male	control 42	0.0726744
CONTROL	PU1	77	male	control 42	0.799419
CONTROL	Blood	77	male	control 42	2.90698
AD	PU1	92	Female	AD61	0.581395
AD	NEUN	92	Female	AD61	0
AD	DN	92	Female	AD61	0.290698
AD	PU1	82	male	AD62	0.581395
AD	NEUN	82	male	AD62	0
AD	DN	82	male	AD62	0
AD	PU1	67	Male	NBB_AD18	0.138889
AD	NEUN	67	Male	NBB_AD18	0
AD	DN	67	Male	NBB_AD18	0.0694444
AD	Blood	67	Male	NBB_AD18	0
AD	PU1	69	Female	NBB_AD19	1.04167
AD	NEUN	69	Female	NBB_AD19	0
AD	DN	69	Female	NBB_AD19	0
AD	Blood	69	Female	NBB_AD19	1.73611
AD	PU1	54	Male	NBB_AD20	0.694444
AD	NEUN	54	Male	NBB_AD20	0.347222
AD	DN	54	Male	NBB_AD20	0.694444
AD	PU1	62	Female	NBB_AD21	0.173611
AD	NEUN	62	Female	NBB_AD21	0.173611
AD	DN	62	Female	NBB_AD21	0.347222
AD	Blood	62	Female	NBB_AD21	0.347222
AD	PU1	66	Female	NBB_AD22	0
AD	NEUN	66	Female	NBB_AD22	0.173611
AD	DN	66	Female	NBB_AD22	0.173611
AD	Blood	66	Female	NBB_AD22	1.38889
AD	PU1	68	Female	NBB_AD23	1.5625
AD	NEUN	68	Female	NBB_AD23	0
AD	DN	68	Female	NBB_AD23	0
AD	Blood	68	Female	NBB_AD23	0
AD	PU1	70	Female	NBB_AD24	0.694444
AD	NEUN	70	Female	NBB_AD24	0.173611
AD	DN	70	Female	NBB_AD24	0.173611
AD	Blood	70	Female	NBB_AD24	1.38889
AD	PU1	65	Male	NBB_AD25	0.347222
AD	NEUN	65	Male	NBB_AD25	0
AD	DN	65	Male	NBB_AD25	0
AD	Blood	65	Male	NBB_AD25	0.347222
AD	PU1	67	Female	NBB_AD26	0.231481
AD	NEUN	67	Female	NBB_AD26	0
AD	DN	67	Female	NBB_AD26	0
AD	Blood	67	Female	NBB_AD26	0.347222
AD	PU1	68	Male	NBB_AD27	0.173611
AD	NEUN	68	Male	NBB_AD27	0.173611
AD	DN	68	Male	NBB_AD27	0
AD	Blood	68	Male	NBB_AD27	0
AD	PU1	57	Female	NBB_AD28	0.173611
AD	NEUN	57	Female	NBB_AD28	0
AD	DN	57	Female	NBB_AD28	0.173611
AD	Blood	57	Female	NBB_AD28	0
AD	PU1	68	Male	NBB_AD29	0.694444
AD	NEUN	68	Male	NBB_AD29	0
AD	DN	68	Male	NBB_AD29	0
AD	PU1	60	Female	NBB_AD30	0.868056
AD	NEUN	60	Female	NBB_AD30	0.347222
AD	DN	60	Female	NBB_AD30	0.347222
AD	Blood	60	Female	NBB_AD30	0.347222
AD	NEUN	54	Female	NBB_AD31	0.173611
AD	PU1	54	Female	NBB_AD31	0.173611
AD	DN	54	Female	NBB_AD31	1.04167
AD	Blood	54	Female	NBB_AD31	0
AD	PU1	59	Female	NBB_AD32	2.95139
AD	NEUN	59	Female	NBB_AD32	0
AD	DN	59	Female	NBB_AD32	0.173611
AD	Blood	59	Female	NBB_AD32	1.04167
AD	NEUN	68	Male	NBB_AD33	0
AD	PU1	68	Male	NBB_AD33	0.726744
AD	DN	68	Male	NBB_AD33	0.173611
AD	Blood	68	Male	NBB_AD33	0.347222
AD	PU1	59	Male	NBB_AD34	0
AD	NEUN	59	Male	NBB_AD34	0
AD	DN	59	Male	NBB_AD34	0
AD	PU1	67	Male	NBB_AD35	1.04167
AD	NEUN	67	Male	NBB_AD35	0
AD	DN	67	Male	NBB_AD35	0.347222
AD	Blood	67	Male	NBB_AD35	0.347222
AD	PU1	64	Male	NBB_AD36	0.347222
AD	NEUN	64	Male	NBB_AD36	0
AD	DN	64	Male	NBB_AD36	0
AD	Blood	64	Male	NBB_AD36	0.694444
AD	PU1	69	Male	NBB_AD37	0.173611
AD	NEUN	69	Male	NBB_AD37	0.173611
AD	DN	69	Male	NBB_AD37	0
AD	Blood	69	Male	NBB_AD37	0.694444
AD	PU1	62	Female	NBB_AD38	0.868056
AD	NEUN	62	Female	NBB_AD38	0
AD	DN	62	Female	NBB_AD38	0.173611
AD	PU1	65	male	NBB_AD39	0.290698
AD	NEUN	65	male	NBB_AD39	0
AD	DN	65	male	NBB_AD39	0.436047
AD	Blood	65	male	NBB_AD39	0.694444
AD	PU1	57	Female	NBB_AD40	0
AD	NEUN	57	Female	NBB_AD40	0
AD	DN	57	Female	NBB_AD40	0
AD	Blood	57	Female	NBB_AD40	0.347222
AD	PU1	64	Female	NBB_AD41	0.581395
AD	NEUN	64	Female	NBB_AD41	0.290698
AD	DN	64	Female	NBB_AD41	0.145349
AD	Blood	64	Female	NBB_AD41	0.694444
AD	PU1	66	Male	NBB_AD42	0.290698
AD	NEUN	66	Male	NBB_AD42	0
AD	DN	66	Male	NBB_AD42	0.145349
AD	Blood	66	Male	NBB_AD42	0
AD	PU1	68	Female	NBB_AD43	0.726744
AD	NEUN	68	Female	NBB_AD43	0
AD	DN	68	Female	NBB_AD43	0
AD	Blood	68	Female	NBB_AD43	0
AD	PU1	67	Male	NBB_AD44	1.45349
AD	NEUN	67	Male	NBB_AD44	0.290698
AD	DN	67	Male	NBB_AD44	0.145349
AD	Blood	67	Male	NBB_AD44	0.347222
AD	PU1	61	Female	NBB_AD45	0.173611
AD	NEUN	61	Female	NBB_AD45	0
AD	DN	61	Female	NBB_AD45	0
AD	Blood	61	Female	NBB_AD45	0.694444
AD	PU1	63	Female	NBB_AD46	0
AD	NEUN	63	Female	NBB_AD46	0.173611
AD	DN	63	Female	NBB_AD46	0.173611
AD	Blood	63	Female	NBB_AD46	1.74419
AD	PU1	64	Female	NBB_AD47	0.520833
AD	NEUN	64	Female	NBB_AD47	0
AD	DN	64	Female	NBB_AD47	0
AD	Blood	64	Female	NBB_AD47	1.45349
AD	PU1	65	Female	NBB_AD48	0.868056
AD	NEUN	65	Female	NBB_AD48	0
AD	DN	65	Female	NBB_AD48	0
AD	Blood	65	Female	NBB_AD48	2.90698
AD	PU1	69	Female	NBB_AD49	0.520833
AD	NEUN	69	Female	NBB_AD49	0
AD	DN	69	Female	NBB_AD49	0
AD	Blood	69	Female	NBB_AD49	2.32558
AD	PU1	70	Female	NBB_AD50	0.726744
AD	NEUN	70	Female	NBB_AD50	0
AD	DN	70	Female	NBB_AD50	0
AD	Blood	70	Female	NBB_AD50	1.16279
AD	PU1	63	Male	NBB_AD51	0.290698
AD	NEUN	63	Male	NBB_AD51	0
AD	DN	63	Male	NBB_AD51	0
AD	Blood	63	Male	NBB_AD51	0.872093
AD	PU1	67	Male	NBB_AD52	1.16279
AD	NEUN	67	Male	NBB_AD52	0
AD	DN	67	Male	NBB_AD52	0.145349
AD	Blood	67	Male	NBB_AD52	1.16279
AD	PU1	68	Male	NBB_AD53	0.872093
AD	NEUN	68	Male	NBB_AD53	0.145349
AD	DN	68	Male	NBB_AD53	0
AD	Blood	68	Male	NBB_AD53	2.03488
AD	PU1	66	Female	NBB_AD54	0.290698
AD	NEUN	66	Female	NBB_AD54	0
AD	DN	66	Female	NBB_AD54	0.145349
AD	Blood	66	Female	NBB_AD54	0
AD	PU1	66	Female	NBB_AD55	0.290698
AD	NEUN	66	Female	NBB_AD55	0.145349
AD	DN	66	Female	NBB_AD55	0.436047
AD	PU1	56	Male	NBB_AD56	0
AD	NEUN	56	Male	NBB_AD56	0
AD	DN	56	Male	NBB_AD56	0
AD	Blood	56	Male	NBB_AD56	1.04167
AD	PU1	69	Male	NBB_AD57	0.145349
AD	NEUN	69	Male	NBB_AD57	0.145349
AD	DN	69	Male	NBB_AD57	0.290698
AD	Blood	69	Male	NBB_AD57	0
AD	PU1	67	Female	NBB_AD58	0.290698
AD	NEUN	67	Female	NBB_AD58	0.145349
AD	DN	67	Female	NBB_AD58	0.290698
AD	PU1	64	Male	NBB_AD59	0.436047
AD	NEUN	64	Male	NBB_AD59	0
AD	DN	64	Male	NBB_AD59	0
AD	Blood	64	Male	NBB_AD59	0.581395
AD	PU1	68	Female	NBB_AD60	0.290698
AD	NEUN	68	Female	NBB_AD60	0
AD	DN	68	Female	NBB_AD60	0.581395
AD	Blood	68	Female	NBB_AD60	0

## Sheet: Figure 2C
disease	cellType	Brain Region	Age	Sex	Patient ID	SNV. Mb -1 (per sample)
CONTROL	PU1	HIP	69	male	control29	0.581395
CONTROL	PU1	Cortex	69	male	control29	0
CONTROL	PU1	CERE+BS	69	male	control29	0.872093
CONTROL	PU1	Cortex	69	male	control29	0
CONTROL	PU1	Cortex	74	Male	NBB_C10	1.45349
CONTROL	PU1	Cortex	68	Female	NBB_C12	0.290698
CONTROL	PU1	Cortex	68	Female	NBB_C12	0.872093
CONTROL	PU1	Cortex	73	Male	NBB_C13	0.872093
CONTROL	PU1	Cortex	69	Female	NBB_C14	0.290698
CONTROL	PU1	Cortex	69	Female	NBB_C14	0
CONTROL	PU1	Cortex	70	Female	NBB_C15	0.347222
CONTROL	PU1	Cortex	65	Female	NBB_C16	0
CONTROL	PU1	Cortex	74	Female	NBB_C2	0.872093
CONTROL	PU1	Cortex	63	Female	NBB_C3	0.347222
CONTROL	PU1	Cortex	63	Female	NBB_C3	0.347222
CONTROL	PU1	Cortex	72	Female	NBB_C6	0
CONTROL	PU1	Cortex	72	Female	NBB_C6	0.694444
CONTROL	PU1	Cortex	72	male	NBB_C7	0.290698
CONTROL	PU1	Cortex	72	male	NBB_C7	0.581395
CONTROL	PU1	Cortex	63	Female	NBB_C8	0
CONTROL	PU1	Cortex	63	Female	NBB_C8	3.19767
CONTROL	PU1	Cortex	73	Female	NBB_C9	0
CONTROL	PU1	HIP	74	Male	control18	0.347222
CONTROL	PU1	Cortex	74	Male	control18	0.290698
CONTROL	PU1	CERE+BS	74	Male	control18	0
CONTROL	PU1	CERE+BS	74	Male	control18	0.347222
CONTROL	PU1	CERE+BS	74	Male	control18	0.290698
CONTROL	PU1	Cortex	74	Male	control18	0
CONTROL	PU1	Cortex	74	male	control 45	0.581395
CONTROL	PU1	CERE+BS	74	male	control 45	0.581395
CONTROL	PU1	Cortex	74	female	control 37	2.03488
CONTROL	PU1	CERE+BS	74	female	control 37	1.16279
CONTROL	PU1	CERE+BS	81	female	control 41	1.45349
CONTROL	PU1	Cortex	81	female	control 41	0
CONTROL	PU1	CERE+BS	81	female	control 41	0.581395
CONTROL	PU1	Cortex	73	male	control30	0.581395
CONTROL	PU1	CERE+BS	73	male	control30	0.290698
CONTROL	PU1	Cortex	73	male	control30	0.290698
CONTROL	PU1	Cortex	73	male	control31	0.581395
CONTROL	PU1	Cortex	71	Female	control21	0
CONTROL	PU1	HIP	71	Female	control21	0
CONTROL	PU1	Cortex	69	Female	control32	0.290698
CONTROL	PU1	Cortex	67	female	control 38	0.581395
CONTROL	PU1	CERE+BS	67	female	control 38	0.872093
CONTROL	PU1	Cortex	67	female	control 38	1.74419
CONTROL	PU1	Cortex	67	female	control 38	0.581395
CONTROL	PU1	Cortex	69	female	control 44	0
CONTROL	PU1	CERE+BS	69	female	control 44	0.581395
CONTROL	PU1	Cortex	69	female	control 44	0.290698
CONTROL	PU1	Cortex	69	female	control 44	0.581395
CONTROL	PU1	CERE+BS	67	Female	control33	0.872093
CONTROL	PU1	Cortex	67	Female	control33	0
CONTROL	PU1	Cortex	67	Female	control33	0.581395
CONTROL	PU1	Cortex	67	Female	control33	0
CONTROL	PU1	CERE+BS	67	Female	control33	0
CONTROL	PU1	CERE+BS	67	Female	control33	0.290698
CONTROL	PU1	CERE+BS	67	Female	control33	0
CONTROL	PU1	CERE+BS	67	Female	control33	2.03488
CONTROL	PU1	Cortex	67	Female	control33	0.581395
CONTROL	PU1	Cortex	64	male	control 39	0.290698
CONTROL	PU1	CERE+BS	76	female	control 40	0
CONTROL	PU1	Cortex	76	female	control 40	0.290698
CONTROL	PU1	Cortex	76	female	control 40	1.16279
CONTROL	PU1	CERE+BS	76	female	control 40	0
CONTROL	PU1	Cortex	76	female	control 40	0
CONTROL	PU1	Cortex	77	male	control 42	0.872093
CONTROL	PU1	Cortex	77	male	control 42	1.16279
CONTROL	PU1	Cortex	77	male	control 42	0.581395
CONTROL	PU1	CERE+BS	77	male	control 42	0.581395
NDD	PU1	HIP	92	Female	AD61	0.581395
NDD	PU1	Cortex	92	Female	AD61	0.872093
NDD	PU1	Cortex	92	Female	AD61	0.290698
NDD	PU1	HIP	82	male	AD62	0.581395
NDD	PU1	Cortex	82	male	AD62	0.872093
NDD	PU1	Cortex	82	male	AD62	0.290698
NDD	PU1	HIP	67	Male	NBB_AD18	0
NDD	PU1	HIP	67	Male	NBB_AD18	0.347222
NDD	PU1	Cortex	67	Male	NBB_AD18	0
NDD	PU1	Cortex	67	Male	NBB_AD18	0
NDD	PU1	Cortex	67	Male	NBB_AD18	0.347222
NDD	PU1	HIP	69	Female	NBB_AD19	0.347222
NDD	PU1	Cortex	69	Female	NBB_AD19	1.73611
NDD	PU1	HIP	54	Male	NBB_AD20	0.694444
NDD	PU1	HIP	62	Female	NBB_AD21	0.347222
NDD	PU1	Cortex	62	Female	NBB_AD21	0
NDD	PU1	HIP	66	Female	NBB_AD22	0
NDD	PU1	Cortex	66	Female	NBB_AD22	0
NDD	PU1	HIP	68	Female	NBB_AD23	1.73611
NDD	PU1	Cortex	68	Female	NBB_AD23	1.38889
NDD	PU1	HIP	70	Female	NBB_AD24	0.347222
NDD	PU1	Cortex	70	Female	NBB_AD24	1.04167
NDD	PU1	HIP	65	Male	NBB_AD25	0.347222
NDD	PU1	Cortex	65	Male	NBB_AD25	0.347222
NDD	PU1	HIP	67	Female	NBB_AD26	0.347222
NDD	PU1	Cortex	67	Female	NBB_AD26	0
NDD	PU1	Cortex	67	Female	NBB_AD26	0.347222
NDD	PU1	HIP	68	Male	NBB_AD27	0
NDD	PU1	Cortex	68	Male	NBB_AD27	0.347222
NDD	PU1	HIP	57	Female	NBB_AD28	0
NDD	PU1	Cortex	57	Female	NBB_AD28	0.347222
NDD	PU1	HIP	68	Male	NBB_AD29	0.694444
NDD	PU1	Cortex	68	Male	NBB_AD29	0.694444
NDD	PU1	HIP	60	Female	NBB_AD30	0.694444
NDD	PU1	Cortex	60	Female	NBB_AD30	1.04167
NDD	PU1	HIP	54	Female	NBB_AD31	0.347222
NDD	PU1	Cortex	54	Female	NBB_AD31	0
NDD	PU1	HIP	59	Female	NBB_AD32	2.08333
NDD	PU1	Cortex	59	Female	NBB_AD32	3.81944
NDD	PU1	HIP	68	Male	NBB_AD33	1.16279
NDD	PU1	Cortex	68	Male	NBB_AD33	0.290698
NDD	PU1	HIP	59	Male	NBB_AD34	0
NDD	PU1	Cortex	59	Male	NBB_AD34	0
NDD	PU1	Cortex	59	Male	NBB_AD34	0
NDD	PU1	HIP	67	Male	NBB_AD35	0.694444
NDD	PU1	Cortex	67	Male	NBB_AD35	1.38889
NDD	PU1	HIP	64	Male	NBB_AD36	0.694444
NDD	PU1	Cortex	64	Male	NBB_AD36	0
NDD	PU1	HIP	69	Male	NBB_AD37	0.347222
NDD	PU1	Cortex	69	Male	NBB_AD37	0
NDD	PU1	HIP	62	Female	NBB_AD38	0.694444
NDD	PU1	Cortex	62	Female	NBB_AD38	1.04167
NDD	PU1	HIP	65	male	NBB_AD39	0.290698
NDD	PU1	Cortex	65	male	NBB_AD39	0.290698
NDD	PU1	HIP	57	Female	NBB_AD40	0
NDD	PU1	Cortex	57	Female	NBB_AD40	0
NDD	PU1	HIP	64	Female	NBB_AD41	0.581395
NDD	PU1	Cortex	64	Female	NBB_AD41	0.581395
NDD	PU1	HIP	66	Male	NBB_AD42	0.290698
NDD	PU1	Cortex	66	Male	NBB_AD42	0.290698
NDD	PU1	HIP	68	Female	NBB_AD43	0.581395
NDD	PU1	Cortex	68	Female	NBB_AD43	0.872093
NDD	PU1	HIP	67	Male	NBB_AD44	1.16279
NDD	PU1	Cortex	67	Male	NBB_AD44	1.74419
NDD	PU1	HIP	61	Female	NBB_AD45	0.347222
NDD	PU1	Cortex	61	Female	NBB_AD45	0
NDD	PU1	HIP	63	Female	NBB_AD46	0
NDD	PU1	Cortex	63	Female	NBB_AD46	0
NDD	PU1	HIP	64	Female	NBB_AD47	0.694444
NDD	PU1	Cortex	64	Female	NBB_AD47	0.347222
NDD	PU1	HIP	65	Female	NBB_AD48	0.694444
NDD	PU1	Cortex	65	Female	NBB_AD48	1.04167
NDD	PU1	HIP	69	Female	NBB_AD49	0.694444
NDD	PU1	Cortex	69	Female	NBB_AD49	0.347222
NDD	PU1	HIP	70	Female	NBB_AD50	0.581395
NDD	PU1	Cortex	70	Female	NBB_AD50	0.872093
NDD	PU1	HIP	63	Male	NBB_AD51	0.290698
NDD	PU1	Cortex	63	Male	NBB_AD51	0.290698
NDD	PU1	HIP	67	Male	NBB_AD52	1.16279
NDD	PU1	Cortex	67	Male	NBB_AD52	1.16279
NDD	PU1	HIP	68	Male	NBB_AD53	1.45349
NDD	PU1	Cortex	68	Male	NBB_AD53	0.290698
NDD	PU1	HIP	66	Female	NBB_AD54	0
NDD	PU1	Cortex	66	Female	NBB_AD54	0.581395
NDD	PU1	HIP	66	Female	NBB_AD55	0.290698
NDD	PU1	Cortex	66	Female	NBB_AD55	0.290698
NDD	PU1	HIP	56	Male	NBB_AD56	0
NDD	PU1	HIP	69	Male	NBB_AD57	0.290698
NDD	PU1	Cortex	69	Male	NBB_AD57	0
NDD	PU1	HIP	67	Female	NBB_AD58	0.290698
NDD	PU1	Cortex	67	Female	NBB_AD58	0.290698
NDD	PU1	HIP	64	Male	NBB_AD59	0
NDD	PU1	Cortex	64	Male	NBB_AD59	0.872093
NDD	PU1	HIP	68	Female	NBB_AD60	0.581395
NDD	PU1	Cortex	68	Female	NBB_AD60	0

## Sheet: Figure 2D
		P-SNV . Mb-1 (per donor)
Patient ID	Age	NEUN	DN	PU1	Blood
control 28	0	0	0	0
control 23	0	0	0	0
control 27	0	0	0	0
control 42	77	0	0	0.218	0
control 40	76	0	0	0	0.291
control 43	46	0	0	0
control 39	64	0		0
control 36	20	0	0	0.058	0
control 33	67	0	0	0.097	0.872
control 35	35	0.048	0	0.048	0.291
control 22	20	0	0	0	0
control 34	35	0	0	0.174	0
control 25	17	0	0	0.058	0.291
control 44	69	0.073	0.145	0.073	0.291
control 38	67	0	0	0.145	0.291
control 32	69	0	0	0	0.872
control 21	71	0	0	0	0
control 31	73	0	0	0	0
control 30	73	0	0.291	0	0
control 24	6	0	0	0	0
control 41	81	0	0.097	0	0.581
control 37	74	0	0	0.291	0.872
control 45	74	0	0	0	0.581
control 20	2	0	0	0	0
control 19	30	0	0	0.05	0
control 18	74	0	0.058	0	0
control 9	73	0	0	0	0
control 8	63	0	0	0	0
control 7	72	0	0.145	0	0
contro 6	72	0	0	0	0
control 5	51	0	0	0
control 3	63	0	0	0
control 2	74	0	0	0.291
control 17	55	0	0	0.145
control 16	65	0	0	0
control 15	70	0	0	0
control 14	69	0	0	0	0
control 13	73	0	0	0.291	0
control 12	68	0	0	0
control 11	54	0	0	0	0
control 10	74	0	0	0	0
control 1	45	0	0	0
AD60	68	0	0	0.145	0
AD59	64	0	0	0.145	0.291
AD58	67	0	0	0
AD57	69	0	0	0.145	0
AD56	56	0	0	0	0.347
AD55	66	0	0	0
AD54	66	0	0	0	0
AD53	68	0	0	0.436	0
AD52	67	0	0	0.291	0.291
AD51	63	0	0	0	0
AD50	70	0	0	0.581	0.581
AD49	69	0	0	0.347	0.291
AD48	65	0	0	0	0.291
AD47	64	0	0	0.174	0
AD46	63	0	0	0	0
AD45	61	0	0	0	0.694
AD44	67	0.145	0	0.291	0
AD43	68	0	0	0.145	0
AD42	66	0	0	0	0
AD41	64	0	0	0	0.347
AD40	57	0	0	0	0
AD39	65	0	0	0.145	0
AD38	62	0	0	0.521
AD37	69	0.174	0	0.174	0
AD36	64	0	0	0.174	0.347
AD35	67	0	0	0.347	0
AD34	59	0	0	0
AD33	68	0	0	0	0.347
AD32	59	0	0	0	0
AD31	54	0	0	0	0
AD30	60	0	0	0.174	0
AD29	68	0	0	0.347
AD28	57	0	0	0	0
AD27	68	0	0	0	0
AD26	67	0	0	0.231	0
AD25	65	0	0	0	0
AD24	70	0	0	0.521	0.694
AD23	68	0	0	0.694	0
AD22	66	0	0	0	0
AD21	62	0	0.174	0	0
AD20	54	0	0	0
AD19	69	0	0	0.174	0
AD18	67	0	0	0	0
AD62	82	0	0	0.388
AD61	92	0	0	0.388
control26	52	0	0	0.194
control29	69	0.073	0	0

## Sheet: Figure 2E
disease	cellType	Age	Sex	Patient ID	P-SNV. Mb -1 (per sample)
CONTROL	PU1	69	male	control29	0
CONTROL	NEUN	69	male	control29	0
CONTROL	DN	69	male	control29	0
CONTROL	PU1	69	male	control29	0
CONTROL	NEUN	69	male	control29	0
CONTROL	PU1	69	male	control29	0
CONTROL	DN	69	male	control29	0
CONTROL	NEUN	69	male	control29	0.290698
CONTROL	PU1	69	male	control29	0
CONTROL	NEUN	69	male	control29	0
CONTROL	DN	69	male	control29	0
CONTROL	DN	69	male	control29	0
CONTROL	PU1	74	Male	NBB_C10	0
CONTROL	NEUN	74	Male	NBB_C10	0
CONTROL	DN	74	Male	NBB_C10	0
CONTROL	Blood	74	Male	NBB_C10	0
CONTROL	PU1	68	Female	NBB_C12	0
CONTROL	NEUN	68	Female	NBB_C12	0
CONTROL	DN	68	Female	NBB_C12	0
CONTROL	PU1	68	Female	NBB_C12	0
CONTROL	NEUN	68	Female	NBB_C12	0
CONTROL	DN	68	Female	NBB_C12	0
CONTROL	PU1	73	Male	NBB_C13	0.290698
CONTROL	NEUN	73	Male	NBB_C13	0
CONTROL	DN	73	Male	NBB_C13	0
CONTROL	Blood	73	Male	NBB_C13	0
CONTROL	DN	69	Female	NBB_C14	0
CONTROL	NEUN	69	Female	NBB_C14	0
CONTROL	PU1	69	Female	NBB_C14	0
CONTROL	PU1	69	Female	NBB_C14	0
CONTROL	NEUN	69	Female	NBB_C14	0
CONTROL	DN	69	Female	NBB_C14	0
CONTROL	Blood	69	Female	NBB_C14	0
CONTROL	PU1	70	Female	NBB_C15	0
CONTROL	NEUN	70	Female	NBB_C15	0
CONTROL	DN	70	Female	NBB_C15	0
CONTROL	PU1	65	Female	NBB_C16	0
CONTROL	DN	65	Female	NBB_C16	0
CONTROL	NEUN	65	Female	NBB_C16	0
CONTROL	PU1	74	Female	NBB_C2	0.290698
CONTROL	NEUN	74	Female	NBB_C2	0
CONTROL	DN	74	Female	NBB_C2	0
CONTROL	PU1	63	Female	NBB_C3	0
CONTROL	NEUN	63	Female	NBB_C3	0
CONTROL	DN	63	Female	NBB_C3	0
CONTROL	PU1	63	Female	NBB_C3	0
CONTROL	NEUN	63	Female	NBB_C3	0
CONTROL	DN	63	Female	NBB_C3	0
CONTROL	PU1	72	Female	NBB_C6	0
CONTROL	NEUN	72	Female	NBB_C6	0
CONTROL	DN	72	Female	NBB_C6	0
CONTROL	PU1	72	Female	NBB_C6	0
CONTROL	NEUN	72	Female	NBB_C6	0
CONTROL	DN	72	Female	NBB_C6	0
CONTROL	Blood	72	Female	NBB_C6	0
CONTROL	PU1	72	male	NBB_C7	0
CONTROL	NEUN	72	male	NBB_C7	0
CONTROL	DN	72	male	NBB_C7	0.290698
CONTROL	DN	72	male	NBB_C7	0
CONTROL	NEUN	72	male	NBB_C7	0
CONTROL	PU1	72	male	NBB_C7	0
CONTROL	Blood	72	male	NBB_C7	0
CONTROL	PU1	63	Female	NBB_C8	0
CONTROL	NEUN	63	Female	NBB_C8	0
CONTROL	DN	63	Female	NBB_C8	0
CONTROL	PU1	63	Female	NBB_C8	0
CONTROL	NEUN	63	Female	NBB_C8	0
CONTROL	Blood	63	Female	NBB_C8	0
CONTROL	PU1	73	Female	NBB_C9	0
CONTROL	NEUN	73	Female	NBB_C9	0
CONTROL	DN	73	Female	NBB_C9	0
CONTROL	Blood	73	Female	NBB_C9	0
CONTROL	PU1	74	Male	control18	0
CONTROL	NEUN	74	Male	control18	0
CONTROL	DN	74	Male	control18	0.347222
CONTROL	PU1	74	Male	control18	0
CONTROL	NEUN	74	Male	control18	0
CONTROL	PU1	74	Male	control18	0
CONTROL	NEUN	74	Male	control18	0
CONTROL	DN	74	Male	control18	0
CONTROL	PU1	74	Male	control18	0
CONTROL	NEUN	74	Male	control18	0
CONTROL	DN	74	Male	control18	0
CONTROL	PU1	74	Male	control18	0
CONTROL	PU1	74	Male	control18	0
CONTROL	NEUN	74	Male	control18	0
CONTROL	NEUN	74	Male	control18	0
CONTROL	DN	74	Male	control18	0
CONTROL	DN	74	Male	control18	0
CONTROL	DN	74	Male	control18	0
CONTROL	Blood	74	Male	control18	0
CONTROL	PU1	74	male	control 45	0
CONTROL	NEUN	74	male	control 45	0
CONTROL	DN	74	male	control 45	0
CONTROL	PU1	74	male	control 45	0
CONTROL	NEUN	74	male	control 45	0
CONTROL	DN	74	male	control 45	0
CONTROL	Blood	74	male	control 45	0.581395
CONTROL	PU1	74	female	control 37	0.581395
CONTROL	NEUN	74	female	control 37	0
CONTROL	DN	74	female	control 37	0
CONTROL	PU1	74	female	control 37	0
CONTROL	NEUN	74	female	control 37	0
CONTROL	DN	74	female	control 37	0
CONTROL	Blood	74	female	control 37	0.872093
CONTROL	PU1	81	female	control 41	0
CONTROL	PU1	81	female	control 41	0
CONTROL	NEUN	81	female	control 41	0
CONTROL	DN	81	female	control 41	0
CONTROL	NEUN	81	female	control 41	0
CONTROL	DN	81	female	control 41	0.290698
CONTROL	PU1	81	female	control 41	0
CONTROL	NEUN	81	female	control 41	0
CONTROL	DN	81	female	control 41	0
CONTROL	Blood	81	female	control 41	0.581395
CONTROL	PU1	73	male	control30	0
CONTROL	NEUN	73	male	control30	0
CONTROL	PU1	73	male	control30	0
CONTROL	DN	73	male	control30	0
CONTROL	NEUN	73	male	control30	0
CONTROL	DN	73	male	control30	0
CONTROL	NEUN	73	male	control30	0
CONTROL	DN	73	male	control30	1.16279
CONTROL	PU1	73	male	control30	0
CONTROL	NEUN	73	male	control30	0
CONTROL	DN	73	male	control30	0
CONTROL	Blood	73	male	control30	0
CONTROL	PU1	73	male	control31	0
CONTROL	NEUN	73	male	control31	0
CONTROL	DN	73	male	control31	0
CONTROL	Blood	73	male	control31	0
CONTROL	PU1	71	Female	control21	0
CONTROL	NEUN	71	Female	control21	0
CONTROL	DN	71	Female	control21	0
CONTROL	PU1	71	Female	control21	0
CONTROL	NEUN	71	Female	control21	0
CONTROL	DN	71	Female	control21	0
CONTROL	Blood	71	Female	control21	0
CONTROL	PU1	69	Female	control32	0
CONTROL	NEUN	69	Female	control32	0
CONTROL	DN	69	Female	control32	0
CONTROL	Blood	69	Female	control32	0.872093
CONTROL	PU1	67	female	control 38	0
CONTROL	NEUN	67	female	control 38	0
CONTROL	PU1	67	female	control 38	0
CONTROL	DN	67	female	control 38	0
CONTROL	NEUN	67	female	control 38	0
CONTROL	DN	67	female	control 38	0
CONTROL	NEUN	67	female	control 38	0
CONTROL	PU1	67	female	control 38	0.581395
CONTROL	DN	67	female	control 38	0
CONTROL	PU1	67	female	control 38	0
CONTROL	NEUN	67	female	control 38	0
CONTROL	DN	67	female	control 38	0
CONTROL	Blood	67	female	control 38	0.290698
CONTROL	PU1	69	female	control 44	0
CONTROL	NEUN	69	female	control 44	0
CONTROL	PU1	69	female	control 44	0
CONTROL	DN	69	female	control 44	0
CONTROL	NEUN	69	female	control 44	0
CONTROL	DN	69	female	control 44	0
CONTROL	NEUN	69	female	control 44	0
CONTROL	PU1	69	female	control 44	0
CONTROL	DN	69	female	control 44	0.581395
CONTROL	PU1	69	female	control 44	0.290698
CONTROL	NEUN	69	female	control 44	0.290698
CONTROL	DN	69	female	control 44	0
CONTROL	Blood	69	female	control 44	0.290698
CONTROL	PU1	67	Female	control33	0
CONTROL	PU1	67	Female	control33	0
CONTROL	NEUN	67	Female	control33	0
CONTROL	DN	67	Female	control33	0
CONTROL	NEUN	67	Female	control33	0
CONTROL	DN	67	Female	control33	0
CONTROL	DN	67	Female	control33	0
CONTROL	DN	67	Female	control33	0
CONTROL	NEUN	67	Female	control33	0
CONTROL	PU1	67	Female	control33	0
CONTROL	PU1	67	Female	control33	0
CONTROL	PU1	67	Female	control33	0
CONTROL	NEUN	67	Female	control33	0
CONTROL	DN	67	Female	control33	0
CONTROL	PU1	67	Female	control33	0.290698
CONTROL	DN	67	Female	control33	0
CONTROL	PU1	67	Female	control33	0
CONTROL	NEUN	67	Female	control33	0
CONTROL	NEUN	67	Female	control33	0
CONTROL	DN	67	Female	control33	0
CONTROL	PU1	67	Female	control33	0.581395
CONTROL	PU1	67	Female	control33	0
CONTROL	NEUN	67	Female	control33	0
CONTROL	NEUN	67	Female	control33	0
CONTROL	NEUN	67	Female	control33	0
CONTROL	DN	67	Female	control33	0
CONTROL	DN	67	Female	control33	0
CONTROL	Blood	67	Female	control33	0.872093
CONTROL	PU1	64	male	control 39	0
CONTROL	NEUN	64	male	control 39	0
CONTROL	PU1	76	female	control 40	0
CONTROL	PU1	76	female	control 40	0
CONTROL	NEUN	76	female	control 40	0
CONTROL	NEUN	76	female	control 40	0
CONTROL	DN	76	female	control 40	0
CONTROL	DN	76	female	control 40	0
CONTROL	PU1	76	female	control 40	0
CONTROL	DN	76	female	control 40	0
CONTROL	PU1	76	female	control 40	0
CONTROL	PU1	76	female	control 40	0
CONTROL	NEUN	76	female	control 40	0
CONTROL	NEUN	76	female	control 40	0
CONTROL	DN	76	female	control 40	0
CONTROL	DN	76	female	control 40	0
CONTROL	Blood	76	female	control 40	0.290698
CONTROL	PU1	77	male	control 42	0
CONTROL	NEUN	77	male	control 42	0
CONTROL	DN	77	male	control 42	0
CONTROL	DN	77	male	control 42	0
CONTROL	NEUN	77	male	control 42	0
CONTROL	PU1	77	male	control 42	0.290698
CONTROL	PU1	77	male	control 42	0.290698
CONTROL	NEUN	77	male	control 42	0
CONTROL	PU1	77	male	control 42	0.290698
CONTROL	NEUN	77	male	control 42	0
CONTROL	DN	77	male	control 42	0
CONTROL	DN	77	male	control 42	0
CONTROL	Blood	77	male	control 42	0
NDD	PU1	92	Female	AD61	0.290698
NDD	NEUN	92	Female	AD61	0
NDD	DN	92	Female	AD61	0
NDD	PU1	92	Female	AD61	0.581395
NDD	NEUN	92	Female	AD61	0
NDD	DN	92	Female	AD61	0
NDD	PU1	92	Female	AD61	0.290698
NDD	NEUN	92	Female	AD61	0
NDD	DN	92	Female	AD61	0
NDD	PU1	82	male	AD62	0.290698
NDD	NEUN	82	male	AD62	0
NDD	DN	82	male	AD62	0
NDD	PU1	82	male	AD62	0.581395
NDD	NEUN	82	male	AD62	0
NDD	DN	82	male	AD62	0
NDD	PU1	82	male	AD62	0.290698
NDD	NEUN	82	male	AD62	0
NDD	DN	82	male	AD62	0
NDD	PU1	67	Male	NBB_AD18	0
NDD	PU1	67	Male	NBB_AD18	0
NDD	NEUN	67	Male	NBB_AD18	0
NDD	NEUN	67	Male	NBB_AD18	0
NDD	PU1	67	Male	NBB_AD18	0
NDD	PU1	67	Male	NBB_AD18	0
NDD	PU1	67	Male	NBB_AD18	0
NDD	NEUN	67	Male	NBB_AD18	0
NDD	DN	67	Male	NBB_AD18	0
NDD	DN	67	Male	NBB_AD18	0
NDD	DN	67	Male	NBB_AD18	0
NDD	DN	67	Male	NBB_AD18	0
NDD	DN	67	Male	NBB_AD18	0
NDD	Blood	67	Male	NBB_AD18	0
NDD	PU1	69	Female	NBB_AD19	0
NDD	NEUN	69	Female	NBB_AD19	0
NDD	PU1	69	Female	NBB_AD19	0.347222
NDD	NEUN	69	Female	NBB_AD19	0
NDD	DN	69	Female	NBB_AD19	0
NDD	DN	69	Female	NBB_AD19	0
NDD	Blood	69	Female	NBB_AD19	0
NDD	PU1	54	Male	NBB_AD20	0
NDD	NEUN	54	Male	NBB_AD20	0
NDD	DN	54	Male	NBB_AD20	0
NDD	PU1	62	Female	NBB_AD21	0
NDD	NEUN	62	Female	NBB_AD21	0
NDD	PU1	62	Female	NBB_AD21	0
NDD	NEUN	62	Female	NBB_AD21	0
NDD	DN	62	Female	NBB_AD21	0.347222
NDD	DN	62	Female	NBB_AD21	0
NDD	Blood	62	Female	NBB_AD21	0
NDD	PU1	66	Female	NBB_AD22	0
NDD	NEUN	66	Female	NBB_AD22	0
NDD	PU1	66	Female	NBB_AD22	0
NDD	NEUN	66	Female	NBB_AD22	0
NDD	DN	66	Female	NBB_AD22	0
NDD	DN	66	Female	NBB_AD22	0
NDD	Blood	66	Female	NBB_AD22	0
NDD	PU1	68	Female	NBB_AD23	0.694444
NDD	NEUN	68	Female	NBB_AD23	0
NDD	PU1	68	Female	NBB_AD23	0.694444
NDD	NEUN	68	Female	NBB_AD23	0
NDD	DN	68	Female	NBB_AD23	0
NDD	DN	68	Female	NBB_AD23	0
NDD	Blood	68	Female	NBB_AD23	0
NDD	PU1	70	Female	NBB_AD24	0.347222
NDD	NEUN	70	Female	NBB_AD24	0
NDD	PU1	70	Female	NBB_AD24	0.694444
NDD	NEUN	70	Female	NBB_AD24	0
NDD	DN	70	Female	NBB_AD24	0
NDD	DN	70	Female	NBB_AD24	0
NDD	Blood	70	Female	NBB_AD24	0.694444
NDD	PU1	65	Male	NBB_AD25	0
NDD	NEUN	65	Male	NBB_AD25	0
NDD	PU1	65	Male	NBB_AD25	0
NDD	NEUN	65	Male	NBB_AD25	0
NDD	DN	65	Male	NBB_AD25	0
NDD	DN	65	Male	NBB_AD25	0
NDD	Blood	65	Male	NBB_AD25	0
NDD	PU1	67	Female	NBB_AD26	0.347222
NDD	NEUN	67	Female	NBB_AD26	0
NDD	PU1	67	Female	NBB_AD26	0
NDD	PU1	67	Female	NBB_AD26	0.347222
NDD	NEUN	67	Female	NBB_AD26	0
NDD	NEUN	67	Female	NBB_AD26	0
NDD	DN	67	Female	NBB_AD26	0
NDD	DN	67	Female	NBB_AD26	0
NDD	DN	67	Female	NBB_AD26	0
NDD	Blood	67	Female	NBB_AD26	0
NDD	PU1	68	Male	NBB_AD27	0
NDD	NEUN	68	Male	NBB_AD27	0
NDD	PU1	68	Male	NBB_AD27	0
NDD	NEUN	68	Male	NBB_AD27	0
NDD	DN	68	Male	NBB_AD27	0
NDD	DN	68	Male	NBB_AD27	0
NDD	Blood	68	Male	NBB_AD27	0
NDD	PU1	57	Female	NBB_AD28	0
NDD	NEUN	57	Female	NBB_AD28	0
NDD	PU1	57	Female	NBB_AD28	0
NDD	NEUN	57	Female	NBB_AD28	0
NDD	DN	57	Female	NBB_AD28	0
NDD	DN	57	Female	NBB_AD28	0
NDD	Blood	57	Female	NBB_AD28	0
NDD	PU1	68	Male	NBB_AD29	0.347222
NDD	NEUN	68	Male	NBB_AD29	0
NDD	PU1	68	Male	NBB_AD29	0.347222
NDD	NEUN	68	Male	NBB_AD29	0
NDD	DN	68	Male	NBB_AD29	0
NDD	DN	68	Male	NBB_AD29	0
NDD	PU1	60	Female	NBB_AD30	0.347222
NDD	NEUN	60	Female	NBB_AD30	0
NDD	PU1	60	Female	NBB_AD30	0
NDD	NEUN	60	Female	NBB_AD30	0
NDD	DN	60	Female	NBB_AD30	0
NDD	DN	60	Female	NBB_AD30	0
NDD	Blood	60	Female	NBB_AD30	0
NDD	PU1	54	Female	NBB_AD31	0
NDD	NEUN	54	Female	NBB_AD31	0
NDD	PU1	54	Female	NBB_AD31	0
NDD	NEUN	54	Female	NBB_AD31	0
NDD	DN	54	Female	NBB_AD31	0
NDD	DN	54	Female	NBB_AD31	0
NDD	Blood	54	Female	NBB_AD31	0
NDD	PU1	59	Female	NBB_AD32	0
NDD	NEUN	59	Female	NBB_AD32	0
NDD	PU1	59	Female	NBB_AD32	0
NDD	NEUN	59	Female	NBB_AD32	0
NDD	DN	59	Female	NBB_AD32	0
NDD	DN	59	Female	NBB_AD32	0
NDD	Blood	59	Female	NBB_AD32	0
NDD	PU1	68	Male	NBB_AD33	0
NDD	NEUN	68	Male	NBB_AD33	0
NDD	NEUN	68	Male	NBB_AD33	0
NDD	PU1	68	Male	NBB_AD33	0
NDD	NEUN	68	Male	NBB_AD33	0
NDD	NEUN	68	Male	NBB_AD33	0
NDD	DN	68	Male	NBB_AD33	0
NDD	DN	68	Male	NBB_AD33	0
NDD	DN	68	Male	NBB_AD33	0
NDD	DN	68	Male	NBB_AD33	0
NDD	Blood	68	Male	NBB_AD33	0.347222
NDD	PU1	59	Male	NBB_AD34	0
NDD	NEUN	59	Male	NBB_AD34	0
NDD	PU1	59	Male	NBB_AD34	0
NDD	PU1	59	Male	NBB_AD34	0
NDD	NEUN	59	Male	NBB_AD34	0
NDD	NEUN	59	Male	NBB_AD34	0
NDD	DN	59	Male	NBB_AD34	0
NDD	DN	59	Male	NBB_AD34	0
NDD	DN	59	Male	NBB_AD34	0
NDD	PU1	67	Male	NBB_AD35	0.347222
NDD	NEUN	67	Male	NBB_AD35	0
NDD	PU1	67	Male	NBB_AD35	0.347222
NDD	NEUN	67	Male	NBB_AD35	0
NDD	DN	67	Male	NBB_AD35	0
NDD	DN	67	Male	NBB_AD35	0
NDD	Blood	67	Male	NBB_AD35	0
NDD	PU1	64	Male	NBB_AD36	0.347222
NDD	NEUN	64	Male	NBB_AD36	0
NDD	PU1	64	Male	NBB_AD36	0
NDD	NEUN	64	Male	NBB_AD36	0
NDD	DN	64	Male	NBB_AD36	0
NDD	DN	64	Male	NBB_AD36	0
NDD	Blood	64	Male	NBB_AD36	0.347222
NDD	PU1	69	Male	NBB_AD37	0.347222
NDD	NEUN	69	Male	NBB_AD37	0
NDD	PU1	69	Male	NBB_AD37	0
NDD	NEUN	69	Male	NBB_AD37	0.347222
NDD	DN	69	Male	NBB_AD37	0
NDD	DN	69	Male	NBB_AD37	0
NDD	Blood	69	Male	NBB_AD37	0
NDD	PU1	62	Female	NBB_AD38	0.694444
NDD	NEUN	62	Female	NBB_AD38	0
NDD	PU1	62	Female	NBB_AD38	0.347222
NDD	NEUN	62	Female	NBB_AD38	0
NDD	DN	62	Female	NBB_AD38	0
NDD	DN	62	Female	NBB_AD38	0
NDD	PU1	65	male	NBB_AD39	0
NDD	NEUN	65	male	NBB_AD39	0
NDD	PU1	65	male	NBB_AD39	0.290698
NDD	NEUN	65	male	NBB_AD39	0
NDD	DN	65	male	NBB_AD39	0
NDD	DN	65	male	NBB_AD39	0
NDD	Blood	65	male	NBB_AD39	0
NDD	PU1	57	Female	NBB_AD40	0
NDD	NEUN	57	Female	NBB_AD40	0
NDD	PU1	57	Female	NBB_AD40	0
NDD	NEUN	57	Female	NBB_AD40	0
NDD	DN	57	Female	NBB_AD40	0
NDD	DN	57	Female	NBB_AD40	0
NDD	Blood	57	Female	NBB_AD40	0
NDD	PU1	64	Female	NBB_AD41	0
NDD	NEUN	64	Female	NBB_AD41	0
NDD	PU1	64	Female	NBB_AD41	0
NDD	NEUN	64	Female	NBB_AD41	0
NDD	DN	64	Female	NBB_AD41	0
NDD	DN	64	Female	NBB_AD41	0
NDD	Blood	64	Female	NBB_AD41	0.347222
NDD	PU1	66	Male	NBB_AD42	0
NDD	PU1	66	Male	NBB_AD42	0
NDD	NEUN	66	Male	NBB_AD42	0
NDD	DN	66	Male	NBB_AD42	0
NDD	DN	66	Male	NBB_AD42	0
NDD	Blood	66	Male	NBB_AD42	0
NDD	PU1	68	Female	NBB_AD43	0.290698
NDD	NEUN	68	Female	NBB_AD43	0
NDD	PU1	68	Female	NBB_AD43	0
NDD	NEUN	68	Female	NBB_AD43	0
NDD	DN	68	Female	NBB_AD43	0
NDD	DN	68	Female	NBB_AD43	0
NDD	Blood	68	Female	NBB_AD43	0
NDD	PU1	67	Male	NBB_AD44	0.581395
NDD	NEUN	67	Male	NBB_AD44	0
NDD	PU1	67	Male	NBB_AD44	0
NDD	NEUN	67	Male	NBB_AD44	0.290698
NDD	DN	67	Male	NBB_AD44	0
NDD	DN	67	Male	NBB_AD44	0
NDD	Blood	67	Male	NBB_AD44	0
NDD	PU1	61	Female	NBB_AD45	0
NDD	NEUN	61	Female	NBB_AD45	0
NDD	PU1	61	Female	NBB_AD45	0
NDD	NEUN	61	Female	NBB_AD45	0
NDD	DN	61	Female	NBB_AD45	0
NDD	DN	61	Female	NBB_AD45	0
NDD	Blood	61	Female	NBB_AD45	0.694444
NDD	PU1	63	Female	NBB_AD46	0
NDD	NEUN	63	Female	NBB_AD46	0
NDD	PU1	63	Female	NBB_AD46	0
NDD	NEUN	63	Female	NBB_AD46	0
NDD	DN	63	Female	NBB_AD46	0
NDD	DN	63	Female	NBB_AD46	0
NDD	Blood	63	Female	NBB_AD46	0
NDD	PU1	64	Female	NBB_AD47	0.347222
NDD	NEUN	64	Female	NBB_AD47	0
NDD	PU1	64	Female	NBB_AD47	0
NDD	NEUN	64	Female	NBB_AD47	0
NDD	DN	64	Female	NBB_AD47	0
NDD	DN	64	Female	NBB_AD47	0
NDD	Blood	64	Female	NBB_AD47	0
NDD	PU1	65	Female	NBB_AD48	0
NDD	NEUN	65	Female	NBB_AD48	0
NDD	PU1	65	Female	NBB_AD48	0
NDD	NEUN	65	Female	NBB_AD48	0
NDD	DN	65	Female	NBB_AD48	0
NDD	DN	65	Female	NBB_AD48	0
NDD	Blood	65	Female	NBB_AD48	0.290698
NDD	PU1	69	Female	NBB_AD49	0.347222
NDD	NEUN	69	Female	NBB_AD49	0
NDD	PU1	69	Female	NBB_AD49	0.347222
NDD	NEUN	69	Female	NBB_AD49	0
NDD	DN	69	Female	NBB_AD49	0
NDD	DN	69	Female	NBB_AD49	0
NDD	Blood	69	Female	NBB_AD49	0.290698
NDD	PU1	70	Female	NBB_AD50	0.581395
NDD	NEUN	70	Female	NBB_AD50	0
NDD	PU1	70	Female	NBB_AD50	0.581395
NDD	NEUN	70	Female	NBB_AD50	0
NDD	DN	70	Female	NBB_AD50	0
NDD	DN	70	Female	NBB_AD50	0
NDD	Blood	70	Female	NBB_AD50	0.581395
NDD	PU1	63	Male	NBB_AD51	0
NDD	NEUN	63	Male	NBB_AD51	0
NDD	PU1	63	Male	NBB_AD51	0
NDD	NEUN	63	Male	NBB_AD51	0
NDD	DN	63	Male	NBB_AD51	0
NDD	DN	63	Male	NBB_AD51	0
NDD	Blood	63	Male	NBB_AD51	0
NDD	PU1	67	Male	NBB_AD52	0.290698
NDD	PU1	67	Male	NBB_AD52	0.290698
NDD	NEUN	67	Male	NBB_AD52	0
NDD	NEUN	67	Male	NBB_AD52	0
NDD	DN	67	Male	NBB_AD52	0
NDD	DN	67	Male	NBB_AD52	0
NDD	Blood	67	Male	NBB_AD52	0.290698
NDD	PU1	68	Male	NBB_AD53	0.581395
NDD	NEUN	68	Male	NBB_AD53	0
NDD	PU1	68	Male	NBB_AD53	0.290698
NDD	NEUN	68	Male	NBB_AD53	0
NDD	DN	68	Male	NBB_AD53	0
NDD	DN	68	Male	NBB_AD53	0
NDD	Blood	68	Male	NBB_AD53	0
NDD	PU1	66	Female	NBB_AD54	0
NDD	PU1	66	Female	NBB_AD54	0
NDD	NEUN	66	Female	NBB_AD54	0
NDD	NEUN	66	Female	NBB_AD54	0
NDD	DN	66	Female	NBB_AD54	0
NDD	DN	66	Female	NBB_AD54	0
NDD	Blood	66	Female	NBB_AD54	0
NDD	PU1	66	Female	NBB_AD55	0
NDD	NEUN	66	Female	NBB_AD55	0
NDD	PU1	66	Female	NBB_AD55	0
NDD	NEUN	66	Female	NBB_AD55	0
NDD	DN	66	Female	NBB_AD55	0
NDD	DN	66	Female	NBB_AD55	0
NDD	PU1	56	Male	NBB_AD56	0
NDD	NEUN	56	Male	NBB_AD56	0
NDD	DN	56	Male	NBB_AD56	0
NDD	Blood	56	Male	NBB_AD56	0.347222
NDD	PU1	69	Male	NBB_AD57	0.290698
NDD	PU1	69	Male	NBB_AD57	0
NDD	NEUN	69	Male	NBB_AD57	0
NDD	NEUN	69	Male	NBB_AD57	0
NDD	DN	69	Male	NBB_AD57	0
NDD	DN	69	Male	NBB_AD57	0
NDD	Blood	69	Male	NBB_AD57	0
NDD	PU1	67	Female	NBB_AD58	0
NDD	PU1	67	Female	NBB_AD58	0
NDD	NEUN	67	Female	NBB_AD58	0
NDD	NEUN	67	Female	NBB_AD58	0
NDD	DN	67	Female	NBB_AD58	0
NDD	DN	67	Female	NBB_AD58	0
NDD	PU1	64	Male	NBB_AD59	0
NDD	PU1	64	Male	NBB_AD59	0.290698
NDD	NEUN	64	Male	NBB_AD59	0
NDD	NEUN	64	Male	NBB_AD59	0
NDD	DN	64	Male	NBB_AD59	0
NDD	DN	64	Male	NBB_AD59	0
NDD	Blood	64	Male	NBB_AD59	0.290698
NDD	PU1	68	Female	NBB_AD60	0.290698
NDD	PU1	68	Female	NBB_AD60	0
NDD	NEUN	68	Female	NBB_AD60	0
NDD	NEUN	68	Female	NBB_AD60	0
NDD	DN	68	Female	NBB_AD60	0
NDD	DN	68	Female	NBB_AD60	0
NDD	Blood	68	Female	NBB_AD60	0

## Sheet: Figure 2F
disease	cellType	Brain Region	Age	Sex	Patient ID	P-SNV. Mb -1 (per sample)
CONTROL	PU1	HIP	69	male	control29	0
CONTROL	PU1	Cortex	69	male	control29	0
CONTROL	PU1	CERE+BS	69	male	control29	0
CONTROL	PU1	Cortex	69	male	control29	0
CONTROL	PU1	Cortex	74	Male	NBB_C10	0
CONTROL	PU1	Cortex	68	Female	NBB_C12	0
CONTROL	PU1	Cortex	68	Female	NBB_C12	0
CONTROL	PU1	Cortex	73	Male	NBB_C13	0.290698
CONTROL	PU1	Cortex	69	Female	NBB_C14	0
CONTROL	PU1	Cortex	69	Female	NBB_C14	0
CONTROL	PU1	Cortex	70	Female	NBB_C15	0
CONTROL	PU1	Cortex	65	Female	NBB_C16	0
CONTROL	PU1	Cortex	74	Female	NBB_C2	0.290698
CONTROL	PU1	Cortex	63	Female	NBB_C3	0
CONTROL	PU1	Cortex	63	Female	NBB_C3	0
CONTROL	PU1	Cortex	72	Female	NBB_C6	0
CONTROL	PU1	Cortex	72	Female	NBB_C6	0
CONTROL	PU1	Cortex	72	male	NBB_C7	0
CONTROL	PU1	Cortex	72	male	NBB_C7	0
CONTROL	PU1	Cortex	63	Female	NBB_C8	0
CONTROL	PU1	Cortex	63	Female	NBB_C8	0
CONTROL	PU1	Cortex	73	Female	NBB_C9	0
CONTROL	PU1	HIP	74	Male	control18	0
CONTROL	PU1	Cortex	74	Male	control18	0
CONTROL	PU1	CERE+BS	74	Male	control18	0
CONTROL	PU1	CERE+BS	74	Male	control18	0
CONTROL	PU1	CERE+BS	74	Male	control18	0
CONTROL	PU1	Cortex	74	Male	control18	0
CONTROL	PU1	Cortex	74	male	control 45	0
CONTROL	PU1	CERE+BS	74	male	control 45	0
CONTROL	PU1	Cortex	74	female	control 37	0.581395
CONTROL	PU1	CERE+BS	74	female	control 37	0
CONTROL	PU1	CERE+BS	81	female	control 41	0
CONTROL	PU1	Cortex	81	female	control 41	0
CONTROL	PU1	CERE+BS	81	female	control 41	0
CONTROL	PU1	Cortex	73	male	control30	0
CONTROL	PU1	CERE+BS	73	male	control30	0
CONTROL	PU1	Cortex	73	male	control30	0
CONTROL	PU1	Cortex	73	male	control31	0
CONTROL	PU1	Cortex	71	Female	control21	0
CONTROL	PU1	HIP	71	Female	control21	0
CONTROL	PU1	Cortex	69	Female	control32	0
CONTROL	PU1	Cortex	67	female	control 38	0
CONTROL	PU1	CERE+BS	67	female	control 38	0
CONTROL	PU1	Cortex	67	female	control 38	0.581395
CONTROL	PU1	Cortex	67	female	control 38	0
CONTROL	PU1	Cortex	69	female	control 44	0
CONTROL	PU1	CERE+BS	69	female	control 44	0
CONTROL	PU1	Cortex	69	female	control 44	0
CONTROL	PU1	Cortex	69	female	control 44	0.290698
CONTROL	PU1	CERE+BS	67	Female	control33	0
CONTROL	PU1	Cortex	67	Female	control33	0
CONTROL	PU1	Cortex	67	Female	control33	0
CONTROL	PU1	Cortex	67	Female	control33	0
CONTROL	PU1	CERE+BS	67	Female	control33	0
CONTROL	PU1	CERE+BS	67	Female	control33	0.290698
CONTROL	PU1	CERE+BS	67	Female	control33	0
CONTROL	PU1	CERE+BS	67	Female	control33	0.581395
CONTROL	PU1	Cortex	67	Female	control33	0
CONTROL	PU1	Cortex	64	male	control 39	0
CONTROL	PU1	CERE+BS	76	female	control 40	0
CONTROL	PU1	Cortex	76	female	control 40	0
CONTROL	PU1	Cortex	76	female	control 40	0
CONTROL	PU1	CERE+BS	76	female	control 40	0
CONTROL	PU1	Cortex	76	female	control 40	0
CONTROL	PU1	Cortex	77	male	control 42	0
CONTROL	PU1	Cortex	77	male	control 42	0.290698
CONTROL	PU1	Cortex	77	male	control 42	0.290698
CONTROL	PU1	CERE+BS	77	male	control 42	0.290698
NDD	PU1	HIP	92	Female	AD61	0.290698
NDD	PU1	Cortex	92	Female	AD61	0.581395
NDD	PU1	Cortex	92	Female	AD61	0.290698
NDD	PU1	HIP	82	male	AD62	0.290698
NDD	PU1	Cortex	82	male	AD62	0.581395
NDD	PU1	Cortex	82	male	AD62	0.290698
NDD	PU1	HIP	67	Male	NBB_AD18	0
NDD	PU1	HIP	67	Male	NBB_AD18	0
NDD	PU1	Cortex	67	Male	NBB_AD18	0
NDD	PU1	Cortex	67	Male	NBB_AD18	0
NDD	PU1	Cortex	67	Male	NBB_AD18	0
NDD	PU1	HIP	69	Female	NBB_AD19	0
NDD	PU1	Cortex	69	Female	NBB_AD19	0.347222
NDD	PU1	HIP	54	Male	NBB_AD20	0
NDD	PU1	HIP	62	Female	NBB_AD21	0
NDD	PU1	Cortex	62	Female	NBB_AD21	0
NDD	PU1	HIP	66	Female	NBB_AD22	0
NDD	PU1	Cortex	66	Female	NBB_AD22	0
NDD	PU1	HIP	68	Female	NBB_AD23	0.694444
NDD	PU1	Cortex	68	Female	NBB_AD23	0.694444
NDD	PU1	HIP	70	Female	NBB_AD24	0.347222
NDD	PU1	Cortex	70	Female	NBB_AD24	0.694444
NDD	PU1	HIP	65	Male	NBB_AD25	0
NDD	PU1	Cortex	65	Male	NBB_AD25	0
NDD	PU1	HIP	67	Female	NBB_AD26	0.347222
NDD	PU1	Cortex	67	Female	NBB_AD26	0
NDD	PU1	Cortex	67	Female	NBB_AD26	0.347222
NDD	PU1	HIP	68	Male	NBB_AD27	0
NDD	PU1	Cortex	68	Male	NBB_AD27	0
NDD	PU1	HIP	57	Female	NBB_AD28	0
NDD	PU1	Cortex	57	Female	NBB_AD28	0
NDD	PU1	HIP	68	Male	NBB_AD29	0.347222
NDD	PU1	Cortex	68	Male	NBB_AD29	0.347222
NDD	PU1	HIP	60	Female	NBB_AD30	0.347222
NDD	PU1	Cortex	60	Female	NBB_AD30	0
NDD	PU1	HIP	54	Female	NBB_AD31	0
NDD	PU1	Cortex	54	Female	NBB_AD31	0
NDD	PU1	HIP	59	Female	NBB_AD32	0
NDD	PU1	Cortex	59	Female	NBB_AD32	0
NDD	PU1	HIP	68	Male	NBB_AD33	0
NDD	PU1	Cortex	68	Male	NBB_AD33	0
NDD	PU1	HIP	59	Male	NBB_AD34	0
NDD	PU1	Cortex	59	Male	NBB_AD34	0
NDD	PU1	Cortex	59	Male	NBB_AD34	0
NDD	PU1	HIP	67	Male	NBB_AD35	0.347222
NDD	PU1	Cortex	67	Male	NBB_AD35	0.347222
NDD	PU1	HIP	64	Male	NBB_AD36	0.347222
NDD	PU1	Cortex	64	Male	NBB_AD36	0
NDD	PU1	HIP	69	Male	NBB_AD37	0.347222
NDD	PU1	Cortex	69	Male	NBB_AD37	0
NDD	PU1	HIP	62	Female	NBB_AD38	0.694444
NDD	PU1	Cortex	62	Female	NBB_AD38	0.347222
NDD	PU1	HIP	65	male	NBB_AD39	0
NDD	PU1	Cortex	65	male	NBB_AD39	0.290698
NDD	PU1	HIP	57	Female	NBB_AD40	0
NDD	PU1	Cortex	57	Female	NBB_AD40	0
NDD	PU1	HIP	64	Female	NBB_AD41	0
NDD	PU1	Cortex	64	Female	NBB_AD41	0
NDD	PU1	HIP	66	Male	NBB_AD42	0
NDD	PU1	Cortex	66	Male	NBB_AD42	0
NDD	PU1	HIP	68	Female	NBB_AD43	0.290698
NDD	PU1	Cortex	68	Female	NBB_AD43	0
NDD	PU1	HIP	67	Male	NBB_AD44	0.581395
NDD	PU1	Cortex	67	Male	NBB_AD44	0
NDD	PU1	HIP	61	Female	NBB_AD45	0
NDD	PU1	Cortex	61	Female	NBB_AD45	0
NDD	PU1	HIP	63	Female	NBB_AD46	0
NDD	PU1	Cortex	63	Female	NBB_AD46	0
NDD	PU1	HIP	64	Female	NBB_AD47	0.347222
NDD	PU1	Cortex	64	Female	NBB_AD47	0
NDD	PU1	HIP	65	Female	NBB_AD48	0
NDD	PU1	Cortex	65	Female	NBB_AD48	0
NDD	PU1	HIP	69	Female	NBB_AD49	0.347222
NDD	PU1	Cortex	69	Female	NBB_AD49	0.347222
NDD	PU1	HIP	70	Female	NBB_AD50	0.581395
NDD	PU1	Cortex	70	Female	NBB_AD50	0.581395
NDD	PU1	HIP	63	Male	NBB_AD51	0
NDD	PU1	Cortex	63	Male	NBB_AD51	0
NDD	PU1	HIP	67	Male	NBB_AD52	0.290698
NDD	PU1	Cortex	67	Male	NBB_AD52	0.290698
NDD	PU1	HIP	68	Male	NBB_AD53	0.581395
NDD	PU1	Cortex	68	Male	NBB_AD53	0.290698
NDD	PU1	HIP	66	Female	NBB_AD54	0
NDD	PU1	Cortex	66	Female	NBB_AD54	0
NDD	PU1	HIP	66	Female	NBB_AD55	0
NDD	PU1	Cortex	66	Female	NBB_AD55	0
NDD	PU1	HIP	56	Male	NBB_AD56	0
NDD	PU1	HIP	69	Male	NBB_AD57	0.290698
NDD	PU1	Cortex	69	Male	NBB_AD57	0
NDD	PU1	HIP	67	Female	NBB_AD58	0
NDD	PU1	Cortex	67	Female	NBB_AD58	0
NDD	PU1	HIP	64	Male	NBB_AD59	0
NDD	PU1	Cortex	64	Male	NBB_AD59	0.290698
NDD	PU1	HIP	68	Female	NBB_AD60	0.290698
NDD	PU1	Cortex	68	Female	NBB_AD60	0

## Sheet: Figure 2G
		disease	cellType	Age	Sex	Patient ID	P-SNV. Mb -1 (perdonor)
		CONTROL	PU1	69	male	control29	0
		CONTROL	NEUN	69	male	control29	0.0726744
		CONTROL	DN	69	male	control29	0.145349
		CONTROL	PU1	74	Male	NBB_C10	0
		CONTROL	NEUN	74	Male	NBB_C10	0
		CONTROL	DN	74	Male	NBB_C10	0
		CONTROL	Blood	74	Male	NBB_C10	0
		CONTROL	PU1	68	Female	NBB_C12	0
		CONTROL	NEUN	68	Female	NBB_C12	0
		CONTROL	DN	68	Female	NBB_C12	0.145349
		CONTROL	PU1	73	Male	NBB_C13	0.290698
		CONTROL	NEUN	73	Male	NBB_C13	0
		CONTROL	DN	73	Male	NBB_C13	0
		CONTROL	Blood	73	Male	NBB_C13	0
		CONTROL	DN	69	Female	NBB_C14	0
		CONTROL	NEUN	69	Female	NBB_C14	0
		CONTROL	PU1	69	Female	NBB_C14	0
		CONTROL	Blood	69	Female	NBB_C14	0
		CONTROL	PU1	70	Female	NBB_C15	0
		CONTROL	NEUN	70	Female	NBB_C15	0
		CONTROL	DN	70	Female	NBB_C15	0
		CONTROL	PU1	65	Female	NBB_C16	0
		CONTROL	DN	65	Female	NBB_C16	0
		CONTROL	NEUN	65	Female	NBB_C16	0
		CONTROL	PU1	74	Female	NBB_C2	0.290698
		CONTROL	NEUN	74	Female	NBB_C2	0
		CONTROL	DN	74	Female	NBB_C2	0
		CONTROL	NEUN	63	Female	NBB_C3	0
		CONTROL	DN	63	Female	NBB_C3	0
		CONTROL	PU1	63	Female	NBB_C3	0
		CONTROL	NEUN	72	Female	NBB_C6	0
		CONTROL	DN	72	Female	NBB_C6	0
		CONTROL	PU1	72	Female	NBB_C6	0
		CONTROL	Blood	72	Female	NBB_C6	0
		CONTROL	DN	72	male	NBB_C7	0.145349
		CONTROL	NEUN	72	male	NBB_C7	0
		CONTROL	PU1	72	male	NBB_C7	0
		CONTROL	Blood	72	male	NBB_C7	0
		CONTROL	DN	63	Female	NBB_C8	0
		CONTROL	PU1	63	Female	NBB_C8	0
		CONTROL	NEUN	63	Female	NBB_C8	0
		CONTROL	Blood	63	Female	NBB_C8	0
		CONTROL	PU1	73	Female	NBB_C9	0
		CONTROL	NEUN	73	Female	NBB_C9	0
		CONTROL	DN	73	Female	NBB_C9	0
		CONTROL	Blood	73	Female	NBB_C9	0
		CONTROL	PU1	74	Male	control18	0.0578704
		CONTROL	NEUN	74	Male	control18	0.0578704
		CONTROL	DN	74	Male	control18	0.0578704
		CONTROL	Blood	74	Male	control18	0
		CONTROL	PU1	74	male	control 45	0
		CONTROL	NEUN	74	male	control 45	0
		CONTROL	DN	74	male	control 45	0.290698
		CONTROL	Blood	74	male	control 45	0.581395
		CONTROL	DN	74	female	control 37	0
		CONTROL	PU1	74	female	control 37	0
		CONTROL	NEUN	74	female	control 37	0
		CONTROL	Blood	74	female	control 37	0.872093
		CONTROL	PU1	81	female	control 41	0
		CONTROL	NEUN	81	female	control 41	0.193798
		CONTROL	DN	81	female	control 41	0.193798
		CONTROL	Blood	81	female	control 41	0.581395
		CONTROL	NEUN	73	male	control30	0
		CONTROL	DN	73	male	control30	0.290698
		CONTROL	PU1	73	male	control30	0
		CONTROL	Blood	73	male	control30	0
		CONTROL	PU1	73	male	control31	0
		CONTROL	NEUN	73	male	control31	0
		CONTROL	DN	73	male	control31	0
		CONTROL	Blood	73	male	control31	0
		CONTROL	PU1	71	Female	control21	0
		CONTROL	NEUN	71	Female	control21	0
		CONTROL	DN	71	Female	control21	0
		CONTROL	Blood	71	Female	control21	0
		CONTROL	PU1	69	Female	control32	0
		CONTROL	NEUN	69	Female	control32	0
		CONTROL	DN	69	Female	control32	0
		CONTROL	Blood	69	Female	control32	0.872093
		CONTROL	PU1	67	female	control 38	0
		CONTROL	NEUN	67	female	control 38	0
		CONTROL	DN	67	female	control 38	0
		CONTROL	Blood	67	female	control 38	0.290698
		CONTROL	PU1	69	female	control 44	0
		CONTROL	NEUN	69	female	control 44	0.145349
		CONTROL	DN	69	female	control 44	0.0726744
		CONTROL	Blood	69	female	control 44	0.290698
		CONTROL	NEUN	67	Female	control33	0.0968992
		CONTROL	PU1	67	Female	control33	0.0968992
		CONTROL	DN	67	Female	control33	0.0645995
		CONTROL	Blood	67	Female	control33	0.872093
		CONTROL	PU1	64	male	control 39	0
		CONTROL	NEUN	64	male	control 39	0
		CONTROL	PU1	76	female	control 40	0
		CONTROL	NEUN	76	female	control 40	0.0726744
		CONTROL	DN	76	female	control 40	0.0581395
		CONTROL	Blood	76	female	control 40	0.290698
		CONTROL	NEUN	77	male	control 42	0
		CONTROL	DN	77	male	control 42	0.0726744
		CONTROL	PU1	77	male	control 42	0.0726744
		CONTROL	Blood	77	male	control 42	0
		NDD	PU1	92	Female	AD61	0.0968992
		NDD	NEUN	92	Female	AD61	0.193798
		NDD	DN	92	Female	AD61	0.0968992
		NDD	PU1	82	male	AD62	0.0968992
		NDD	NEUN	82	male	AD62	0.193798
		NDD	DN	82	male	AD62	0.193798
		NDD	PU1	67	Male	NBB_AD18	0
		NDD	NEUN	67	Male	NBB_AD18	0
		NDD	DN	67	Male	NBB_AD18	0
		NDD	Blood	67	Male	NBB_AD18	0
		NDD	PU1	69	Female	NBB_AD19	0
		NDD	NEUN	69	Female	NBB_AD19	0.173611
		NDD	DN	69	Female	NBB_AD19	0
		NDD	Blood	69	Female	NBB_AD19	0
		NDD	PU1	54	Male	NBB_AD20	0
		NDD	NEUN	54	Male	NBB_AD20	0
		NDD	DN	54	Male	NBB_AD20	0
		NDD	PU1	62	Female	NBB_AD21	0
		NDD	NEUN	62	Female	NBB_AD21	0.173611
		NDD	DN	62	Female	NBB_AD21	0.173611
		NDD	Blood	62	Female	NBB_AD21	0
		NDD	PU1	66	Female	NBB_AD22	0
		NDD	NEUN	66	Female	NBB_AD22	0
		NDD	DN	66	Female	NBB_AD22	0
		NDD	Blood	66	Female	NBB_AD22	0
		NDD	PU1	68	Female	NBB_AD23	0.347222
		NDD	NEUN	68	Female	NBB_AD23	0.347222
		NDD	DN	68	Female	NBB_AD23	0
		NDD	Blood	68	Female	NBB_AD23	0
		NDD	PU1	70	Female	NBB_AD24	0.173611
		NDD	NEUN	70	Female	NBB_AD24	0.347222
		NDD	DN	70	Female	NBB_AD24	0.347222
		NDD	Blood	70	Female	NBB_AD24	0.694444
		NDD	PU1	65	Male	NBB_AD25	0
		NDD	NEUN	65	Male	NBB_AD25	0
		NDD	DN	65	Male	NBB_AD25	0
		NDD	Blood	65	Male	NBB_AD25	0
		NDD	PU1	67	Female	NBB_AD26	0.115741
		NDD	NEUN	67	Female	NBB_AD26	0.115741
		NDD	DN	67	Female	NBB_AD26	0
		NDD	Blood	67	Female	NBB_AD26	0
		NDD	PU1	68	Male	NBB_AD27	0
		NDD	NEUN	68	Male	NBB_AD27	0
		NDD	DN	68	Male	NBB_AD27	0
		NDD	Blood	68	Male	NBB_AD27	0
		NDD	PU1	57	Female	NBB_AD28	0
		NDD	NEUN	57	Female	NBB_AD28	0
		NDD	DN	57	Female	NBB_AD28	0
		NDD	Blood	57	Female	NBB_AD28	0
		NDD	PU1	68	Male	NBB_AD29	0.173611
		NDD	NEUN	68	Male	NBB_AD29	0.173611
		NDD	DN	68	Male	NBB_AD29	0
		NDD	PU1	60	Female	NBB_AD30	0.173611
		NDD	NEUN	60	Female	NBB_AD30	0
		NDD	DN	60	Female	NBB_AD30	0
		NDD	Blood	60	Female	NBB_AD30	0
		NDD	NEUN	54	Female	NBB_AD31	0
		NDD	PU1	54	Female	NBB_AD31	0
		NDD	DN	54	Female	NBB_AD31	0
		NDD	Blood	54	Female	NBB_AD31	0
		NDD	PU1	59	Female	NBB_AD32	0
		NDD	NEUN	59	Female	NBB_AD32	0
		NDD	DN	59	Female	NBB_AD32	0
		NDD	Blood	59	Female	NBB_AD32	0
		NDD	NEUN	68	Male	NBB_AD33	0
		NDD	PU1	68	Male	NBB_AD33	0
		NDD	DN	68	Male	NBB_AD33	0
		NDD	Blood	68	Male	NBB_AD33	0.347222
		NDD	PU1	59	Male	NBB_AD34	0
		NDD	NEUN	59	Male	NBB_AD34	0
		NDD	DN	59	Male	NBB_AD34	0
		NDD	PU1	67	Male	NBB_AD35	0.173611
		NDD	NEUN	67	Male	NBB_AD35	0.173611
		NDD	DN	67	Male	NBB_AD35	0
		NDD	Blood	67	Male	NBB_AD35	0
		NDD	PU1	64	Male	NBB_AD36	0
		NDD	NEUN	64	Male	NBB_AD36	0
		NDD	DN	64	Male	NBB_AD36	0.173611
		NDD	Blood	64	Male	NBB_AD36	0.347222
		NDD	PU1	69	Male	NBB_AD37	0.173611
		NDD	NEUN	69	Male	NBB_AD37	0.173611
		NDD	DN	69	Male	NBB_AD37	0
		NDD	Blood	69	Male	NBB_AD37	0
		NDD	PU1	62	Female	NBB_AD38	0.347222
		NDD	NEUN	62	Female	NBB_AD38	0.173611
		NDD	DN	62	Female	NBB_AD38	0
		NDD	PU1	65	male	NBB_AD39	0
		NDD	NEUN	65	male	NBB_AD39	0.145349
		NDD	DN	65	male	NBB_AD39	0
		NDD	Blood	65	male	NBB_AD39	0
		NDD	PU1	57	Female	NBB_AD40	0
		NDD	NEUN	57	Female	NBB_AD40	0
		NDD	DN	57	Female	NBB_AD40	0
		NDD	Blood	57	Female	NBB_AD40	0
		NDD	PU1	64	Female	NBB_AD41	0
		NDD	NEUN	64	Female	NBB_AD41	0
		NDD	DN	64	Female	NBB_AD41	0.173611
		NDD	Blood	64	Female	NBB_AD41	0.347222
		NDD	PU1	66	Male	NBB_AD42	0
		NDD	NEUN	66	Male	NBB_AD42	0
		NDD	DN	66	Male	NBB_AD42	0
		NDD	Blood	66	Male	NBB_AD42	0
		NDD	PU1	68	Female	NBB_AD43	0.145349
		NDD	NEUN	68	Female	NBB_AD43	0
		NDD	DN	68	Female	NBB_AD43	0
		NDD	Blood	68	Female	NBB_AD43	0
		NDD	PU1	67	Male	NBB_AD44	0.290698
		NDD	NEUN	67	Male	NBB_AD44	0.145349
		NDD	DN	67	Male	NBB_AD44	0
		NDD	Blood	67	Male	NBB_AD44	0
		NDD	PU1	61	Female	NBB_AD45	0
		NDD	NEUN	61	Female	NBB_AD45	0
		NDD	DN	61	Female	NBB_AD45	0
		NDD	Blood	61	Female	NBB_AD45	0.694444
		NDD	PU1	63	Female	NBB_AD46	0
		NDD	NEUN	63	Female	NBB_AD46	0
		NDD	DN	63	Female	NBB_AD46	0
		NDD	Blood	63	Female	NBB_AD46	0
		NDD	PU1	64	Female	NBB_AD47	0.173611
		NDD	NEUN	64	Female	NBB_AD47	0
		NDD	DN	64	Female	NBB_AD47	0
		NDD	Blood	64	Female	NBB_AD47	0
		NDD	PU1	65	Female	NBB_AD48	0
		NDD	NEUN	65	Female	NBB_AD48	0
		NDD	DN	65	Female	NBB_AD48	0.145349
		NDD	Blood	65	Female	NBB_AD48	0.290698
		NDD	PU1	69	Female	NBB_AD49	0.173611
		NDD	NEUN	69	Female	NBB_AD49	0.173611
		NDD	DN	69	Female	NBB_AD49	0
		NDD	Blood	69	Female	NBB_AD49	0.290698
		NDD	PU1	70	Female	NBB_AD50	0.290698
		NDD	NEUN	70	Female	NBB_AD50	0
		NDD	DN	70	Female	NBB_AD50	0.290698
		NDD	Blood	70	Female	NBB_AD50	0.581395
		NDD	PU1	63	Male	NBB_AD51	0
		NDD	NEUN	63	Male	NBB_AD51	0
		NDD	DN	63	Male	NBB_AD51	0
		NDD	Blood	63	Male	NBB_AD51	0
		NDD	PU1	67	Male	NBB_AD52	0.145349
		NDD	NEUN	67	Male	NBB_AD52	0
		NDD	DN	67	Male	NBB_AD52	0
		NDD	Blood	67	Male	NBB_AD52	0.290698
		NDD	PU1	68	Male	NBB_AD53	0.290698
		NDD	NEUN	68	Male	NBB_AD53	0.145349
		NDD	DN	68	Male	NBB_AD53	0
		NDD	Blood	68	Male	NBB_AD53	0
		NDD	PU1	66	Female	NBB_AD54	0
		NDD	NEUN	66	Female	NBB_AD54	0
		NDD	DN	66	Female	NBB_AD54	0
		NDD	Blood	66	Female	NBB_AD54	0
		NDD	PU1	66	Female	NBB_AD55	0
		NDD	NEUN	66	Female	NBB_AD55	0
		NDD	DN	66	Female	NBB_AD55	0
		NDD	PU1	56	Male	NBB_AD56	0
		NDD	NEUN	56	Male	NBB_AD56	0
		NDD	DN	56	Male	NBB_AD56	0
		NDD	Blood	56	Male	NBB_AD56	0.347222
		NDD	PU1	69	Male	NBB_AD57	0.145349
		NDD	NEUN	69	Male	NBB_AD57	0
		NDD	DN	69	Male	NBB_AD57	0
		NDD	Blood	69	Male	NBB_AD57	0
		NDD	PU1	67	Female	NBB_AD58	0
		NDD	NEUN	67	Female	NBB_AD58	0
		NDD	DN	67	Female	NBB_AD58	0
		NDD	PU1	64	Male	NBB_AD59	0.145349
		NDD	NEUN	64	Male	NBB_AD59	0
		NDD	DN	64	Male	NBB_AD59	0.145349
		NDD	Blood	64	Male	NBB_AD59	0.290698
		NDD	PU1	68	Female	NBB_AD60	0
		NDD	NEUN	68	Female	NBB_AD60	0
		NDD	DN	68	Female	NBB_AD60	0
		NDD	Blood	68	Female	NBB_AD60	0

## Sheet: Figure 2H
UniqueSampleID	Donor	Status	AnatomicalLocation	BrainBank	CellType	Age	Sex	SNVburden	Predicted
CEB_5603_1	AD61	NDD	HIP	French	PU.1	92	F	0.290698	0.421201
CEB_5603_2	AD61	NDD	Cortex	French	PU.1	92	F	0.581395	0.421201
CEB_5603_3	AD61	NDD	Cortex	French	PU.1	92	F	0.290698	0.421201
CEB_8730_1	AD62	NDD	HIP	French	PU.1	82	M	0.290698	0.374342
CEB_8730_2	AD62	NDD	Cortex	French	PU.1	82	M	0.581395	0.374342
CEB_8730_3	AD62	NDD	Cortex	French	PU.1	82	M	0.290698	0.374342
RA15-19_1	control 37	CONTROL	Cortex	MSKCC	PU.1	74	F	0.581395	0.192278
RA15-19_2	control 37	CONTROL	CERE+BS	MSKCC	PU.1	74	F	0	0.192278
RA17-22_1	control 38	CONTROL	Cortex	MSKCC	PU.1	67	F	0	0.0997107
RA17-22_2	control 38	CONTROL	CERE+BS	MSKCC	PU.1	67	F	0	0.0997107
RA17-22_3	control 38	CONTROL	Cortex	MSKCC	PU.1	67	F	0.581395	0.0997107
RA17-22_4	control 38	CONTROL	Cortex	MSKCC	PU.1	67	F	0	0.0997107
RA19-13_1	control 39	CONTROL	Cortex	MSKCC	PU.1	64	M	0	-0.0219107
RA19-24_1	control 40	CONTROL	CERE+BS	MSKCC	PU.1	76	F	0	0.0307157
RA19-24_2	control 40	CONTROL	Cortex	MSKCC	PU.1	76	F	0	0.0307157
RA19-24_3	control 40	CONTROL	Cortex	MSKCC	PU.1	76	F	0	0.0307157
RA19-24_4	control 40	CONTROL	CERE+BS	MSKCC	PU.1	76	F	0	0.0307157
RA19-24_5	control 40	CONTROL	Cortex	MSKCC	PU.1	76	F	0	0.0307157
RA16-24-6	control 41	CONTROL	CERE+BS	MSKCC	PU.1	81	F	0	0.0667195
RA16-24-7	control 41	CONTROL	Cortex	MSKCC	PU.1	81	F	0	0.0667195
RA16-24_8	control 41	CONTROL	CERE+BS	MSKCC	PU.1	81	F	0	0.0667195
RA19-28_1	control 42	CONTROL	Cortex	MSKCC	PU.1	77	M	0	0.188
RA19-28_2	control 42	CONTROL	Cortex	MSKCC	PU.1	77	M	0.290698	0.188
RA19-28_3	control 42	CONTROL	Cortex	MSKCC	PU.1	77	M	0.290698	0.188
RA19-28_4	control 42	CONTROL	CERE+BS	MSKCC	PU.1	77	M	0.290698	0.188
RA17-42_1	control 44	CONTROL	Cortex	MSKCC	PU.1	69	F	0	0.0580983
RA17-42_2	control 44	CONTROL	CERE+BS	MSKCC	PU.1	69	F	0	0.0580983
RA17-42_3	control 44	CONTROL	Cortex	MSKCC	PU.1	69	F	0	0.0580983
RA17-42_4	control 44	CONTROL	Cortex	MSKCC	PU.1	69	F	0.290698	0.0580983
RA15-17_1	control 45	CONTROL	Cortex	MSKCC	PU.1	74	M	0	0.0426474
RA15-17_2	control 45	CONTROL	CERE+BS	MSKCC	PU.1	74	M	0	0.0426474
NIH_2772_1	control18	CONTROL	HIP	NIH	PU.1	74	M	0	0.0210142
NIH_2772_2	control18	CONTROL	Cortex	NIH	PU.1	74	M	0	0.0210142
NIH_2772_3	control18	CONTROL	CERE+BS	NIH	PU.1	74	M	0	0.0210142
NIH_2772_4	control18	CONTROL	CERE+BS	NIH	PU.1	74	M	0	0.0210142
NIH_2772_5	control18	CONTROL	CERE+BS	NIH	PU.1	74	M	0	0.0210142
NIH_2772_6	control18	CONTROL	Cortex	NIH	PU.1	74	M	0	0.0210142
RA17_44_1	control21	CONTROL	Cortex	NIH	PU.1	71	F	0	0.0249717
RA17_44_2	control21	CONTROL	HIP	NIH	PU.1	71	F	0	0.0249717
CEB_3549_1	control29	CONTROL	HIP	French	PU.1	69	M	0	0.00870641
CEB_3549_2	control29	CONTROL	Cortex	French	PU.1	69	M	0	0.00870641
CEB_3549_3	control29	CONTROL	CERE+BS	French	PU.1	69	M	0	0.00870641
CEB_3549_4	control29	CONTROL	Cortex	French	PU.1	69	M	0	0.00870641
RA17_32_1	control30	CONTROL	Cortex	MSKCC	PU.1	73	M	0	0.0292321
RA17_32_2	control30	CONTROL	CERE+BS	MSKCC	PU.1	73	M	0	0.0292321
RA17_32_3	control30	CONTROL	Cortex	MSKCC	PU.1	73	M	0	0.0292321
RA17_4_1	control31	CONTROL	Cortex	MSKCC	PU.1	73	M	0	0.0494933
RA17_6_1	control32	CONTROL	Cortex	MSKCC	PU.1	69	F	0	0.0177582
RA19_18_1	control33	CONTROL	CERE+BS	MSKCC	PU.1	67	F	0	0.080616
RA19_18_2	control33	CONTROL	Cortex	MSKCC	PU.1	67	F	0	0.080616
RA19_18_3	control33	CONTROL	Cortex	MSKCC	PU.1	67	F	0	0.080616
RA19_18_4	control33	CONTROL	Cortex	MSKCC	PU.1	67	F	0	0.080616
RA19_18_5	control33	CONTROL	CERE+BS	MSKCC	PU.1	67	F	0	0.080616
RA19_18_6	control33	CONTROL	CERE+BS	MSKCC	PU.1	67	F	0.290698	0.080616
RA19_18_7	control33	CONTROL	CERE+BS	MSKCC	PU.1	67	F	0	0.080616
RA19_18_8	control33	CONTROL	CERE+BS	MSKCC	PU.1	67	F	0.581395	0.080616
RA19_18_9	control33	CONTROL	Cortex	MSKCC	PU.1	67	F	0	0.080616
NBB_AD18_1	NBB_AD18	NDD	HIP	NBB	PU.1	67	M	0	0.0468619
NBB_AD18_2	NBB_AD18	NDD	HIP	NBB	PU.1	67	M	0	0.0468619
NBB_AD183	NBB_AD18	NDD	Cortex	NBB	PU.1	67	M	0	0.0468619
NBB_AD184	NBB_AD18	NDD	Cortex	NBB	PU.1	67	M	0	0.0468619
NBB_AD185	NBB_AD18	NDD	Cortex	NBB	PU.1	67	M	0	0.0468619
NBB_AD19_1	NBB_AD19	NDD	HIP	NBB	PU.1	69	F	0	0.18419
NBB_AD19_2	NBB_AD19	NDD	Cortex	NBB	PU.1	69	F	0.347222	0.18419
NBB_AD20_1	NBB_AD20	NDD	HIP	NBB	PU.1	54	M	0	0.00868397
NBB_AD21_1	NBB_AD21	NDD	HIP	NBB	PU.1	62	F	0	0.0535843
NBB_AD21_2	NBB_AD21	NDD	Cortex	NBB	PU.1	62	F	0	0.0535843
NBB_AD22_1	NBB_AD22	NDD	HIP	NBB	PU.1	66	F	0	0.0771519
NBB_AD22_2	NBB_AD22	NDD	Cortex	NBB	PU.1	66	F	0	0.0771519
NBB_AD23_1	NBB_AD23	NDD	HIP	NBB	PU.1	68	F	0.694444	0.446387
NBB_AD23_2	NBB_AD23	NDD	Cortex	NBB	PU.1	68	F	0.694444	0.446387
NBB_AD24_1	NBB_AD24	NDD	HIP	NBB	PU.1	70	F	0.347222	0.368808
NBB_AD24_2	NBB_AD24	NDD	Cortex	NBB	PU.1	70	F	0.694444	0.368808
NBB_AD25_1	NBB_AD25	NDD	HIP	NBB	PU.1	65	M	0	0.07126
NBB_AD25_2	NBB_AD25	NDD	Cortex	NBB	PU.1	65	M	0	0.07126
NBB_AD26_1	NBB_AD26	NDD	HIP	NBB	PU.1	67	F	0.347222	0.208189
NBB_AD26_2	NBB_AD26	NDD	Cortex	NBB	PU.1	67	F	0	0.208189
NBB_AD26_3	NBB_AD26	NDD	Cortex	NBB	PU.1	67	F	0.347222	0.208189
NBB_AD27_1	NBB_AD27	NDD	HIP	NBB	PU.1	68	M	0	0.0889357
NBB_AD27_2	NBB_AD27	NDD	Cortex	NBB	PU.1	68	M	0	0.0889357
NBB_AD28_1	NBB_AD28	NDD	HIP	NBB	PU.1	57	F	0	0.0241247
NBB_AD28_2	NBB_AD28	NDD	Cortex	NBB	PU.1	57	F	0	0.0241247
NBB_AD29_1	NBB_AD29	NDD	HIP	NBB	PU.1	68	M	0.347222	0.267661
NBB_AD29_2	NBB_AD29	NDD	Cortex	NBB	PU.1	68	M	0.347222	0.267661
NBB_AD30_1	NBB_AD30	NDD	HIP	NBB	PU.1	60	F	0.347222	0.131163
NBB_AD30_2	NBB_AD30	NDD	Cortex	NBB	PU.1	60	F	0	0.131163
NBB_AD31_1	NBB_AD31	NDD	HIP	NBB	PU.1	54	F	0	0.00644902
NBB_AD31_2	NBB_AD31	NDD	Cortex	NBB	PU.1	54	F	0	0.00644902
NBB_AD32_1	NBB_AD32	NDD	HIP	NBB	PU.1	59	F	0	0.0359085
NBB_AD32_2	NBB_AD32	NDD	Cortex	NBB	PU.1	59	F	0	0.0359085
NBB_AD33_1	NBB_AD33	NDD	HIP	NBB	PU.1	68	M	0	0.0889357
NBB_AD33_2	NBB_AD33	NDD	Cortex	NBB	PU.1	68	M	0	0.0889357
NBB_AD34_1	NBB_AD34	NDD	HIP	NBB	PU.1	59	M	0	0.0285586
NBB_AD34_2	NBB_AD34	NDD	Cortex	NBB	PU.1	59	M	0	0.0285586
NBB_AD34_3	NBB_AD34	NDD	Cortex	NBB	PU.1	59	M	0	0.0285586
NBB_AD35_1	NBB_AD35	NDD	HIP	NBB	PU.1	67	M	0.347222	0.261769
NBB_AD35_2	NBB_AD35	NDD	Cortex	NBB	PU.1	67	M	0.347222	0.261769
NBB_AD36_1	NBB_AD36	NDD	HIP	NBB	PU.1	64	M	0.347222	0.154731
NBB_AD36_2	NBB_AD36	NDD	Cortex	NBB	PU.1	64	M	0	0.154731
NBB_AD37_1	NBB_AD37	NDD	HIP	NBB	PU.1	69	M	0.347222	0.18419
NBB_AD37_2	NBB_AD37	NDD	Cortex	NBB	PU.1	69	M	0	0.18419
NBB_AD38_1	NBB_AD38	NDD	HIP	NBB	PU.1	62	F	0.694444	0.321673
NBB_AD38_2	NBB_AD38	NDD	Cortex	NBB	PU.1	62	F	0.347222	0.321673
NBB_AD39_1	NBB_AD39	NDD	HIP	NBB	PU.1	65	M	0	0.146075
NBB_AD39_2	NBB_AD39	NDD	Cortex	NBB	PU.1	65	M	0.290698	0.146075
NBB_AD40_1	NBB_AD40	NDD	HIP	NBB	PU.1	57	F	0	0.0241247
NBB_AD40_2	NBB_AD40	NDD	Cortex	NBB	PU.1	57	F	0	0.0241247
NBB_AD41_1	NBB_AD41	NDD	HIP	NBB	PU.1	64	F	0	0.0653681
NBB_AD41_2	NBB_AD41	NDD	Cortex	NBB	PU.1	64	F	0	0.0653681
NBB_AD42_1	NBB_AD42	NDD	HIP	NBB	PU.1	66	M	0	0.0771519
NBB_AD42_2	NBB_AD42	NDD	Cortex	NBB	PU.1	66	M	0	0.0771519
NBB_AD43_1	NBB_AD43	NDD	HIP	NBB	PU.1	68	F	0.290698	0.163751
NBB_AD43_2	NBB_AD43	NDD	Cortex	NBB	PU.1	68	F	0	0.163751
NBB_AD44_1	NBB_AD44	NDD	HIP	NBB	PU.1	67	M	0.581395	0.232675
NBB_AD44_2	NBB_AD44	NDD	Cortex	NBB	PU.1	67	M	0	0.232675
NBB_AD45_1	NBB_AD45	NDD	HIP	NBB	PU.1	61	F	0	0.0476924
NBB_AD45_2	NBB_AD45	NDD	Cortex	NBB	PU.1	61	F	0	0.0476924
NBB_AD46_1	NBB_AD46	NDD	HIP	NBB	PU.1	63	F	0	0.0594762
NBB_AD46_2	NBB_AD46	NDD	Cortex	NBB	PU.1	63	F	0	0.0594762
NBB_AD47_1	NBB_AD47	NDD	HIP	NBB	PU.1	64	F	0.347222	0.154731
NBB_AD47_2	NBB_AD47	NDD	Cortex	NBB	PU.1	64	F	0	0.154731
NBB_AD48_1	NBB_AD48	NDD	HIP	NBB	PU.1	65	F	0	0.07126
NBB_AD48_2	NBB_AD48	NDD	Cortex	NBB	PU.1	65	F	0	0.07126
NBB_AD49_1	NBB_AD49	NDD	HIP	NBB	PU.1	69	F	0.347222	0.273553
NBB_AD49_2	NBB_AD49	NDD	Cortex	NBB	PU.1	69	F	0.347222	0.273553
NBB_AD50_1	NBB_AD50	NDD	HIP	NBB	PU.1	70	F	0.581395	0.399981
NBB_AD50_2	NBB_AD50	NDD	Cortex	NBB	PU.1	70	F	0.581395	0.399981
NBB_AD51_1	NBB_AD51	NDD	HIP	NBB	PU.1	63	M	0	0.0594762
NBB_AD51_2	NBB_AD51	NDD	Cortex	NBB	PU.1	63	M	0	0.0594762
NBB_AD52_1	NBB_AD52	NDD	HIP	NBB	PU.1	67	M	0.290698	0.232675
NBB_AD52_2	NBB_AD52	NDD	Cortex	NBB	PU.1	67	M	0.290698	0.232675
NBB_AD53_1	NBB_AD53	NDD	HIP	NBB	PU.1	68	M	0.581395	0.313382
NBB_AD53_2	NBB_AD53	NDD	Cortex	NBB	PU.1	68	M	0.290698	0.313382
NBB_AD54_1	NBB_AD54	NDD	HIP	NBB	PU.1	66	F	0	0.0771519
NBB_AD54_2	NBB_AD54	NDD	Cortex	NBB	PU.1	66	F	0	0.0771519
NBB_AD55_1	NBB_AD55	NDD	HIP	NBB	PU.1	66	F	0	0.0771519
NBB_AD55_2	NBB_AD55	NDD	Cortex	NBB	PU.1	66	F	0	0.0771519
NBB_AD56_1	NBB_AD56	NDD	HIP	NBB	PU.1	56	M	0	0.0245515
NBB_AD57_1	NBB_AD57	NDD	HIP	NBB	PU.1	69	M	0.290698	0.169643
NBB_AD57_2	NBB_AD57	NDD	Cortex	NBB	PU.1	69	M	0	0.169643
NBB_AD58_1	NBB_AD58	NDD	HIP	NBB	PU.1	67	F	0	0.0830438
NBB_AD58_2	NBB_AD58	NDD	Cortex	NBB	PU.1	67	F	0	0.0830438
NBB_AD59_1	NBB_AD59	NDD	HIP	NBB	PU.1	64	M	0	0.140183
NBB_AD59_2	NBB_AD59	NDD	Cortex	NBB	PU.1	64	M	0.290698	0.140183
NBB_AD60_1	NBB_AD60	NDD	HIP	NBB	PU.1	68	F	0.290698	0.163751
NBB_AD60_2	NBB_AD60	NDD	Cortex	NBB	PU.1	68	F	0	0.163751
NBB_C10_1	NBB_C10	CONTROL	Cortex	NBB	PU.1	74	M	0	0.0574271
NBB_C12_1	NBB_C12	CONTROL	Cortex	NBB	PU.1	68	F	0	0.00729595
NBB_C12_2	NBB_C12	CONTROL	Cortex	NBB	PU.1	68	F	0	0.00729595
NBB_C13_1	NBB_C13	CONTROL	Cortex	NBB	PU.1	73	M	0.290698	0.150236
NBB_C14_1	NBB_C14	CONTROL	Cortex	NBB	PU.1	69	F	0	0.0131879
NBB_C14_2	NBB_C14	CONTROL	Cortex	NBB	PU.1	69	F	0	0.0131879
NBB_C15_1	NBB_C15	CONTROL	Cortex	NBB	PU.1	70	F	0	0.025692
NBB_C16_1	NBB_C16	CONTROL	Cortex	NBB	PU.1	65	F	0	-0.0139769
NBB_C2_1	NBB_C2	CONTROL	Cortex	NBB	PU.1	74	F	0.290698	0.15817
NBB_C3_1	NBB_C3	CONTROL	Cortex	NBB	PU.1	63	F	0	-0.0221636
NBB_C3_2	NBB_C3	CONTROL	Cortex	NBB	PU.1	63	F	0	-0.0221636
NBB_C6_1	NBB_C6	CONTROL	Cortex	NBB	PU.1	72	F	0	0.0308636
NBB_C6_2	NBB_C6	CONTROL	Cortex	NBB	PU.1	72	F	0	0.0308636
NBB_C7_1	NBB_C7	CONTROL	Cortex	NBB	PU.1	72	M	0	0.0308636
NBB_C7_2	NBB_C7	CONTROL	Cortex	NBB	PU.1	72	M	0	0.0308636
NBB_C8_1	NBB_C8	CONTROL	Cortex	NBB	PU.1	63	F	0	-0.0221636
NBB_C8_2	NBB_C8	CONTROL	Cortex	NBB	PU.1	63	F	0	-0.0221636
NBB_C9_1	NBB_C9	CONTROL	Cortex	NBB	PU.1	73	F	0	0.0494933
