# Supplementary material for: A microglia clonal inflammatory disorder in Alzheimer’s disease
Source: eLife. 2025 Mar 14;13:RP96519. doi: 10.7554/eLife.96519 (PMC11908784; doi:10.7554/eLife.96519)
Supplement: Figure 3—figure supplement 1—source data 1. [file elife-96519-fig3-figsupp1-data1.xlsx]

## Sheet: B
Empty vector (Puro-)	Empty vector (Puro+)	Cbl WT-	Cbl WT+	Y371H+	I383M+	C384Y+	C404Y+	C416S+
0.84858	0.589986	0.487962	0.51222	0.612881	1.01508	1.00108	1.08766	0.748101
0.505623	0.762892	0.320681	0.402177	0.902463	1.41491	1.11997	1.96314	1.53805
0.993704	0.45938	0.243479	0.504276	0.362334	1.3087	1.10115	1.40303	0.775837
