# Supplementary material for: A microglia clonal inflammatory disorder in Alzheimer’s disease
Source: eLife. 2025 Mar 14;13:RP96519. doi: 10.7554/eLife.96519 (PMC11908784; doi:10.7554/eLife.96519)
Supplement: Figure 3—source data 1. [file elife-96519-fig3-data1.xlsx]

## Sheet: Figure 3A
Pathway	Enrichment	(-logP)
Chronic myeloid leukemia	4.42857	2.9
PID MAPK TRK PATHWAY	8.4881	2.4
receptor tyrosine kinase binding	8.4881	2.4
TK signaling	14.551	3.14

## Sheet: Figure 3B
Gene	Patients (%)
CBL	13.3333
RIT1	4.44444
BRAF	2.22222
KRAS	2.22222
PTPN11	2.22222
NF1	2.22222
TEK	2.22222
U2AF1	2.22222
TP53	2.22222
SMAD3	2.22222
TET2	6.66667
DNMT3A	6.66667
CHEK2	4.44444
ASXL1	2.22222
KMT2C	2.22222
ATR	2.22222
SETD2	2.22222
IDH2	2.22222
MED12	2.22222
SMC1A	2.22222
PBRM1	2.22222

## Sheet: Figure 3C
P-SNV. Mb -1 (per sample)
AD	CTRL
0.291	0
0	0
0	0
0.291	0
0.291	0
0.291	0
0	0
0	0.291
0	0
0	0
0	0
0	0
0	0
0	0
0	0
0	0
0	0
0	0
0	0
0	0
0	0
0	0
0	0
0	0
0	0
0	0
0	0
0	0
0	0
0	0
0	0
0	0
0	0
0	0
0.347	0
0	0
0	0
0	0
0	0
0	0
0	0
0	0
0	0.291
0	0
0	0
0	0
0	0.291
0	0
0	0
0	0
0.347	0
0.347	0
0.291	0
0	0
0	0
0	0
0	0
0	0
0	0
0	0
0.291	0
0	0
0.291	0
0	0
0	0
0	0
0	0
0	0
0.347	0
0
0
0
0
0
0
0
0
0
0.291
0.291
0.581
0
0
0
0
0
0
0
0
0
0
0
0
0.291
0

## Sheet: Figure 3E
CBL WT+	CBL Y371H+	CBL I383M+	CBL C384Y+	CBL C404Y+	CBL C416S+
0.162643	0.673492	0.952345	1.1235	0.969064	0.710797
1.03934	1.66653	1.18877	0.979109	0.933978	1.34259
0.591249	1.42918	1.30707	0.724308	0.927998	1.02404
0.623825	0.847028	0.796812	0.993034	0.828005	0.752458
0.607923	0.812646	0.83221	0.769969	1.03069	1.45579

## Sheet: Figure 3F
RIT1 WT-	RIT1 WT+	RIT1 F99C-	RIT1 F99C+	RIT1 M107V-	RIT1 M107V+
0.155257	0.338052	0.050414	1.34492	1.05812	1.7296
0.070374	0.366288	0.1257	0.63743	0.456641	0.661299
0.042292	0.589623	0.106043	0.535824	0.922527	1.34824
0.045871	0.445574	0.143932	0.855893	0.312862	0.773978

## Sheet: Figure 3G
VAF (%)
GENE	AD62	AD61	AD60	AD59	AD57	AD53	AD52	AD50	AD49	AD47	AD44	AD43	AD39	AD38	AD37	AD36	AD35	AD30	AD29	AD26	AD24	AD23	AD19
CBL	0.883392
CBL	1.12721
CBL	0.936768
PBRM1	2.39
CBL		1.02
TET2		1.168
TET2		0.75
TET2		0.77
CBL			1.7
DNMT3A				1.17
CHEK2					1.41
ATR						1.13
BRAF						0.808
CBL						1.19
KRAS							4.778
KRAS							2.23
DNMT3A								0.698603
DNMT3A								1.13
DNMT3A								0.6
DNMT3A								0.67
SMAD3									1.791
SMAD3									1.385
CBL										1.089
CBL											5.747
IDH2											0.94
PTPN11												1.18
TEK													1.205
NF1														1.86
RIT1														1.09
SMC1A														1
SETD2															1.76
TP53																1.113
U2AF1																	1.02
U2AF1																	1.02
RIT1																		0.745
DNMT3A																			2.14
DNMT3A																			1.6
TET2																				0.58
TET2																				0.642
KMT2C																					4.8
KMT2C																					3.39
TET2																					0.68
ASXL1																						1.173
ASXL1																						0.7
CHEK2																						5.6
CHEK2																						2.96
MED12																							1.832
BRAFV600E VAF (%)
patient #1	patient #2	patient #3	patient #4	patient #5	patient #6
11.36	2.5	1.9	12	1.68	1.9
21.2		11.5		1.6	3.4
3.8		4.8		4.2	1.3
0.69		23.3		5.4
2.65		18.4		14.9
		21		18.62
				1.2
				1
				0.78
