# Supplementary material for: A microglia clonal inflammatory disorder in Alzheimer’s disease
Source: eLife. 2025 Mar 14;13:RP96519. doi: 10.7554/eLife.96519 (PMC11908784; doi:10.7554/eLife.96519)
Supplement: Figure 4—figure supplement 1—source data 1. [file elife-96519-fig4-figsupp1-data1.xlsx]

## Sheet: B
PTPN11WT	PTPN11T73I
0.54	1.51
0.53	1.24

## Sheet: D
CBL
CBL404C/C	CBL404C/Y
0.019	0.018
0.017	0.019
0.013	0.015
0.005	0.013
0.006	0.004
0.001	0.002
	0.001
CBL-B
CBL404C/C	CBL404C/Y
0.021	0.034
0.028	0.029
0.034	0.072
0.011617	0.007
0.008668	0.005

## Sheet: E
	CBL, copies per ng C404Y											CBL, copies per ng WT
#1	0	0	0									0.195	0.88	0.185	0.785
#2				0	0	0	0	0	0	0					0.305	0.115	0.39	0.635	0.265	0.62
#1					0.03	0.095	0.13	0.225	0.245	0.2						0.03	0.03	0.04	0.255	0.35	0.2
#2	0.09	0.31	0.14	0.075								0.185	0.24	0.175	0.19

## Sheet: H
CBL404C/C	CBL404C/Y
92.9	87.6
93.9	86
91.8	85.8
79.8	79.9
83.2	80.6
82.2	82.4

## Sheet: I
	CBL404C/C							CBL404C/Y
	0.74	0.8	0.49	0.36	0.29			0.89	1.16	1.12	0.85	0.63	1.26
	1.06	1.06	0.48	0.47	0.32			0.97	1.71	1.45	1.43	1.33	2.15
