# Supplementary material for: A microglia clonal inflammatory disorder in Alzheimer’s disease
Source: eLife. 2025 Mar 14;13:RP96519. doi: 10.7554/eLife.96519 (PMC11908784; doi:10.7554/eLife.96519)
Supplement: Figure 4—source data 1. [file elife-96519-fig4-data1.xlsx]

## Sheet: Figure 4A
Blot quantification
	CBLWT	CBLI383M	CBLC384Y	CBLC404Y	CBLC416S
	0.54	1.03	0.47	0.74	0.68
	0.53	1.18	0.51	0.94	0.71
	0.58	0.92	0.75	1.22	1.06
	0.58				1.03
	0.54				0.63
					1.42
	RIT1WT	RIT1F82L	RIT1M90I
	0.32	0.98	1.81
	0.24	0.58	0.76
	0.22	0.83	1.06
	KRASWT	KRASA59G
	0.5	1.14
	0.63	0.85
	0.58	1.1
Edu
	CBLWT	CBLI383M	CBLC384Y	CBLC404Y	CBLC416S	CBLR420Q	RIT1WT	RIT1F99C	RIT1M107V	KRASWT	KRASA59G
	26.2	28.6	34	30.2	29.5	32.1	25.9	36.5	29.5	24.9	31.5
	29	28.7	32.4	28.6	28	30.9	26.8	34.6	29.9	24.5	29.7
	26.6	30.2	35.8	30	30.2	33.2	27.7	38.7	32.8	24.7	31.5
	29.6	34.2	37.1	34.6	33.5	31.7
	29	32.9	37.3	37.5	32.4	33.9
	30.1	33	36.9	32.5	34.7	33.7

## Sheet: Figure 4D
CBL 404C/C		CBL 404C/Y
#1	#2	#1	#2
39.1	26.2	64	66.4
15.1	8.6	35.2	44.4
7.9	39.3	52.5	85.4
17.6	10.2	59.8
	24.3	52.9
		49.5
		78.2

## Sheet: Figure 4E
CBL 404C/C		CBL 404C/Y
#1	#2	#1	#2
118.912	108.416	135.936	143.872
118.464	109.888	129.536	139.648
121.088	108.224	120.768	141.696
105.92	111.936	132.544	116.16
100.928	102.848	116.16	124.16
101.12	102.016	117.888	128.448
97.856	104	115.584	127.232

## Sheet: Figure 4F
EdU+ (%)
CBL 404C/C	CBL 404C/Y
15.4	40.4
20	27.3
7.69	25.2
25	33.3
	57.9
	28.6

## Sheet: Figure 4G
	"CBL 404C/C "				CBL 404C/Y
Not treated	0.15	0.15	0.4	0.4	0.16	0.26	0.36	1.09
CSF-1	1.24	0.71	1.61	1.17	1.66	1.85	2.33	2.25
