# Supplementary material for: A microglia clonal inflammatory disorder in Alzheimer’s disease
Source: eLife. 2025 Mar 14;13:RP96519. doi: 10.7554/eLife.96519 (PMC11908784; doi:10.7554/eLife.96519)
Supplement: Figure 5—source data 1. [file elife-96519-fig5-data1.xlsx]

## Sheet: Figure 5B
CFH
CBL404C/C	CBL404C/Y
0.56	1.71
0.71	1.57
0.6	0.71
0.58	0.95
1.22	1.26
0.61	1.45
	0.73
	0.65
C3
CBL404C/C	CBL404C/Y
6.35	10.68
5.78	14.22
8.86	15.5
7.88	21.95
9.48	10.39
4.07	11.28
	9.58
	11.02
IFN-g
CBL404C/C	CBL404C/Y
1.43	6
1.57	4.29
1.43	4.95
0.42	3.49
0.23	3.08
0.02	3.22
0.15	1.71
0.07	1.43
0.39	0.13
0.18	0.05
0.02	0.07
0.13	0.34
0.57	3.08
0.72	2.54
0.53	2.27
0.18	2.27
0.23	1.71
0.5	1.99
	1.42
	1.37
	1.37
	1.37
IL-1b
CBL404C/C	CBL404C/Y
2.08	8.53
0.64	1.52
0.94	0
0	2.62
1.1	2.08
1.24	3.92
0.82	6.15
1.9	0.94
1.1	0.82
0.96	0.21
1.37	0.82
0	2.03
2.88	0.94
0.32	0.32
1.1	2.08
0.67	0.94
0.53	1.52
1.1	1.52
	10.58
	7.89
	7.44
	9.02
IL6
CBL404C/C	CBL404C/Y
78.71	969
103.6	1064.45
165.42	994.4
112.06	321.28
72.94	283.34
64.26	289.62
70.72	256.41
78.2	260.24
101.16	71.06
51.19	69.08
47	58.8
58.48	108.95
43.18	782.13
134.67	451.44
99.77	256.16
85.25	240.25
110.65	244.42
83.58	271.27
	1306.77
	1351.81
	1426.9
	1149.04
TNF
CBL404C/C	CBL404C/Y
12.71	37.2
11.82	35.12
25.75	37.44
20.67	30.92
26.65	28.86
26.3	32.99
24.08	63.2
27.96	53.21
18.08	29.27
13.62	24.81
9.04	25.57
10.82	21.53
3.62	23.45
18.62	24
9.04	40.11
11.41	34.46
17.57	69.43
12.62	73.59
	147.77
	155.51
	141.2
	132.12
