# Supplementary material for: A microglia clonal inflammatory disorder in Alzheimer’s disease
Source: eLife. 2025 Mar 14;13:RP96519. doi: 10.7554/eLife.96519 (PMC11908784; doi:10.7554/eLife.96519)
Supplement: Supplementary file 1. [file elife-96519-supp1.xlsx]

## Sheet: Table S1_sample information
Disease	cell_Type	Brain region	Sub-brain region	Blood available	Patient ID	Brain Bank	mg of tissue	nuclei sorted	DNA Total Mass (ng)	PCR cycles
NDD	DN	Occipital Cortex	Cortex	no	NBB_AD62	Neuro-CEB, Hôpital de la Pitié-Salpêtrière	0.26	576011	321.89	8
NDD	DN	Frontal cortex	Cortex	no	NBB_AD62	Neuro-CEB, Hôpital de la Pitié-Salpêtrière	0.35	169410	191.17	8
NDD	DN	Caudate nucleus	HIP	no	NBB_AD62	Neuro-CEB, Hôpital de la Pitié-Salpêtrière	0.34	306000	378.21	8
NDD	NEUN	Occipital Cortex	Cortex	no	NBB_AD62	Neuro-CEB, Hôpital de la Pitié-Salpêtrière	0.26	1071688	1915.63	8
NDD	NEUN	Frontal cortex	Cortex	no	NBB_AD62	Neuro-CEB, Hôpital de la Pitié-Salpêtrière	0.35	455055	841.13	8
NDD	NEUN	Caudate nucleus	HIP	no	NBB_AD62	Neuro-CEB, Hôpital de la Pitié-Salpêtrière	0.34	339671	786.67	8
NDD	PU1	Occipital Cortex	Cortex	no	NBB_AD62	Neuro-CEB, Hôpital de la Pitié-Salpêtrière	0.26	154999	25.74	8
NDD	PU1	Frontal cortex	Cortex	no	NBB_AD62	Neuro-CEB, Hôpital de la Pitié-Salpêtrière	0.35	149000	95.15	8
NDD	PU1	Caudate nucleus	HIP	no	NBB_AD62	Neuro-CEB, Hôpital de la Pitié-Salpêtrière	0.34	118044	144.9	8
NDD	DN	Frontal cortex	Cortex	no	NBB_AD61	Neuro-CEB, Hôpital de la Pitié-Salpêtrière	0.48	1087000	2393.41	8
NDD	DN	Occipital Cortex	Cortex	no	NBB_AD61	Neuro-CEB, Hôpital de la Pitié-Salpêtrière	0.62	1315820	1530.83	8
NDD	DN	Caudate nucleus	HIP	no	NBB_AD61	Neuro-CEB, Hôpital de la Pitié-Salpêtrière	0.33	756500	1145.18	8
NDD	NEUN	Occipital Cortex	Cortex	no	NBB_AD61	Neuro-CEB, Hôpital de la Pitié-Salpêtrière	0.62	2013601	3044.2	8
NDD	NEUN	Frontal cortex	Cortex	no	NBB_AD61	Neuro-CEB, Hôpital de la Pitié-Salpêtrière	0.48	1069612	2780.13	8
NDD	NEUN	Caudate nucleus	HIP	no	NBB_AD61	Neuro-CEB, Hôpital de la Pitié-Salpêtrière	0.33	315005	693.56	8
NDD	PU1	Occipital Cortex	Cortex	no	NBB_AD61	Neuro-CEB, Hôpital de la Pitié-Salpêtrière	0.62	151000	231.24	8
NDD	PU1	Frontal cortex	Cortex	no	NBB_AD61	Neuro-CEB, Hôpital de la Pitié-Salpêtrière	0.48	138000	281.13	8
NDD	PU1	Caudate nucleus	HIP	no	NBB_AD61	Neuro-CEB, Hôpital de la Pitié-Salpêtrière	0.33	100678	213.67	8
NDD	Blood	Blood	Blood	yes	NBB_AD60	Netherlands Brain Bank			428	8
NDD	DN	Superior Parietal Cortex	Cortex	yes	NBB_AD60	Netherlands Brain Bank	0.54	400334	461.7	8
NDD	DN	Hippocampus	HIP	yes	NBB_AD60	Netherlands Brain Bank	0.34	284033	379.8	8
NDD	NEUN	Superior Parietal Cortex	Cortex	yes	NBB_AD60	Netherlands Brain Bank	0.54	448061	486.6	8
NDD	NEUN	Hippocampus	HIP	yes	NBB_AD60	Netherlands Brain Bank	0.34	344022	203.6	8
NDD	PU1	Superior Parietal Cortex	Cortex	yes	NBB_AD60	Netherlands Brain Bank	0.54	216444	214.6	8
NDD	PU1	Hippocampus	HIP	yes	NBB_AD60	Netherlands Brain Bank	0.34	179100	275.8	8
NDD	Blood	Blood	Blood	yes	NBB_AD59	Netherlands Brain Bank			844	8
NDD	DN	Superior Parietal Cortex	Cortex	yes	NBB_AD59	Netherlands Brain Bank	0.64	274444	177.66	8
NDD	DN	Hippocampus	HIP	yes	NBB_AD59	Netherlands Brain Bank	0.31	703476	1356.3	8
NDD	NEUN	Superior Parietal Cortex	Cortex	yes	NBB_AD59	Netherlands Brain Bank	0.64	680984	537.84	8
NDD	NEUN	Hippocampus	HIP	yes	NBB_AD59	Netherlands Brain Bank	0.31	700512	1255.2	8
NDD	PU1	Superior Parietal Cortex	Cortex	yes	NBB_AD59	Netherlands Brain Bank	0.64	65036	32.13	8
NDD	PU1	Hippocampus	HIP	yes	NBB_AD59	Netherlands Brain Bank	0.31	318200	394.4	8
NDD	DN	Superior Parietal Cortex	Cortex	no	NBB_AD58	Netherlands Brain Bank	0.72	900472	913.1	8
NDD	DN	Hippocampus	HIP	no	NBB_AD58	Netherlands Brain Bank	0.54	750003	521.3	8
NDD	NEUN	Superior Parietal Cortex	Cortex	no	NBB_AD58	Netherlands Brain Bank	0.72	695678	737.8	8
NDD	NEUN	Hippocampus	HIP	no	NBB_AD58	Netherlands Brain Bank	0.54	587056	479.9	8
NDD	PU1	Superior Parietal Cortex	Cortex	no	NBB_AD58	Netherlands Brain Bank	0.72	279250	318.6	8
NDD	PU1	Hippocampus	HIP	no	NBB_AD58	Netherlands Brain Bank	0.54	196000	127	8
NDD	Blood	Blood	Blood	yes	NBB_AD57	Netherlands Brain Bank			315	8
NDD	DN	Superior Parietal Cortex	Cortex	yes	NBB_AD57	Netherlands Brain Bank	0.89	1110440	177.66	8
NDD	DN	Hippocampus	HIP	yes	NBB_AD57	Netherlands Brain Bank	0.37	360057	418.3	8
NDD	NEUN	Superior Parietal Cortex	Cortex	yes	NBB_AD57	Netherlands Brain Bank	0.89	1245568	537.84	8
NDD	NEUN	Hippocampus	HIP	yes	NBB_AD57	Netherlands Brain Bank	0.37	350000	364.1	8
NDD	PU1	Superior Parietal Cortex	Cortex	yes	NBB_AD57	Netherlands Brain Bank	0.89	119010	75.67	8
NDD	PU1	Hippocampus	HIP	yes	NBB_AD57	Netherlands Brain Bank	0.37	120000	106.1	8
NDD	Blood	Blood	Blood	yes	NBB_AD56	Netherlands Brain Bank			104351	8
NDD	DN	Superior Parietal Cortex	Cortex	yes	NBB_AD56	Netherlands Brain Bank	0.23	120964	26.4	8
NDD	NEUN	Hippocampus	HIP	yes	NBB_AD56	Netherlands Brain Bank	0.58	716071	739	8
NDD	PU1	Hippocampus	HIP	yes	NBB_AD56	Netherlands Brain Bank	0.58	169520	184.7	8
NDD	DN	Superior Parietal Cortex	Cortex	no	NBB_AD55	Netherlands Brain Bank	0.51	995234	756.5	8
NDD	DN	Hippocampus	HIP	no	NBB_AD55	Netherlands Brain Bank	0.5	888678	1056.5	8
NDD	NEUN	Superior Parietal Cortex	Cortex	no	NBB_AD55	Netherlands Brain Bank	0.51	1085633	738.4	8
NDD	NEUN	Hippocampus	HIP	no	NBB_AD55	Netherlands Brain Bank	0.5	810512	1035.4	8
NDD	PU1	Superior Parietal Cortex	Cortex	no	NBB_AD55	Netherlands Brain Bank	0.51	300801	234.4	8
NDD	PU1	Hippocampus	HIP	no	NBB_AD55	Netherlands Brain Bank	0.5	195613	159.7	8
NDD	Blood	Blood	Blood	yes	NBB_AD54	Netherlands Brain Bank			569	8
NDD	DN	Superior Parietal Cortex	Cortex	yes	NBB_AD54	Netherlands Brain Bank	0.55	519478	869	8
NDD	DN	Hippocampus	HIP	yes	NBB_AD54	Netherlands Brain Bank	0.3	643785	1118	8
NDD	NEUN	Superior Parietal Cortex	Cortex	yes	NBB_AD54	Netherlands Brain Bank	0.55	1113985	1686	8
NDD	NEUN	Hippocampus	HIP	yes	NBB_AD54	Netherlands Brain Bank	0.3	480044	685	8
NDD	PU1	Superior Parietal Cortex	Cortex	yes	NBB_AD54	Netherlands Brain Bank	0.55	171300	258	8
NDD	PU1	Hippocampus	HIP	yes	NBB_AD54	Netherlands Brain Bank	0.3	220666	344	8
NDD	Blood	Blood	Blood	yes	NBB_AD53	Netherlands Brain Bank			1471	8
NDD	DN	Superior Parietal Cortex	Cortex	yes	NBB_AD53	Netherlands Brain Bank	0.3	829002	1408	8
NDD	DN	Hippocampus	HIP	yes	NBB_AD53	Netherlands Brain Bank	0.55	797677	606	8
NDD	NEUN	Superior Parietal Cortex	Cortex	yes	NBB_AD53	Netherlands Brain Bank	0.3	600000	1325	8
NDD	NEUN	Hippocampus	HIP	yes	NBB_AD53	Netherlands Brain Bank	0.55	980000	234	8
NDD	PU1	Superior Parietal Cortex	Cortex	yes	NBB_AD53	Netherlands Brain Bank	0.3	214500	257	8
NDD	PU1	Hippocampus	HIP	yes	NBB_AD53	Netherlands Brain Bank	0.55	312002	281	8
NDD	Blood	Blood	Blood	yes	NBB_AD52	Netherlands Brain Bank			470	8
NDD	DN	Superior Parietal Cortex	Cortex	yes	NBB_AD52	Netherlands Brain Bank	0.29	769400	808	8
NDD	DN	Hippocampus	HIP	yes	NBB_AD52	Netherlands Brain Bank	0.62	372860	485	8
NDD	NEUN	Superior Parietal Cortex	Cortex	yes	NBB_AD52	Netherlands Brain Bank	0.29	1469099	1206	8
NDD	NEUN	Hippocampus	HIP	yes	NBB_AD52	Netherlands Brain Bank	0.62	952066	730	8
NDD	PU1	Superior Parietal Cortex	Cortex	yes	NBB_AD52	Netherlands Brain Bank	0.29	245055	126	8
NDD	PU1	Hippocampus	HIP	yes	NBB_AD52	Netherlands Brain Bank	0.62	163405	130	8
NDD	Blood	Blood	Blood	yes	NBB_AD51	Netherlands Brain Bank			555	8
NDD	DN	Superior Parietal Cortex	Cortex	yes	NBB_AD51	Netherlands Brain Bank	0.26	640600	628	8
NDD	DN	Hippocampus	HIP	yes	NBB_AD51	Netherlands Brain Bank	0.32	680678	826	8
NDD	NEUN	Superior Parietal Cortex	Cortex	yes	NBB_AD51	Netherlands Brain Bank	0.26	1055990	1098	8
NDD	NEUN	Hippocampus	HIP	yes	NBB_AD51	Netherlands Brain Bank	0.32	890567	1344	8
NDD	PU1	Superior Parietal Cortex	Cortex	yes	NBB_AD51	Netherlands Brain Bank	0.26	126370	89	8
NDD	PU1	Hippocampus	HIP	yes	NBB_AD51	Netherlands Brain Bank	0.32	140555	101	8
NDD	Blood	Blood	Blood	yes	NBB_AD50	Netherlands Brain Bank			659	8
NDD	DN	Superior Parietal Cortex	Cortex	yes	NBB_AD50	Netherlands Brain Bank	0.34	615000	989	8
NDD	DN	Hippocampus	HIP	yes	NBB_AD50	Netherlands Brain Bank	0.6	454033	481	8
NDD	NEUN	Superior Parietal Cortex	Cortex	yes	NBB_AD50	Netherlands Brain Bank	0.34	613044	907	8
NDD	NEUN	Hippocampus	HIP	yes	NBB_AD50	Netherlands Brain Bank	0.6	327611	227	8
NDD	PU1	Superior Parietal Cortex	Cortex	yes	NBB_AD50	Netherlands Brain Bank	0.34	204031	222	8
NDD	PU1	Hippocampus	HIP	yes	NBB_AD50	Netherlands Brain Bank	0.6	132573	97	8
NDD	Blood	Blood	Blood	yes	NBB_AD49	Netherlands Brain Bank			575	8
NDD	DN	Superior Parietal Cortex	Cortex	yes	NBB_AD49	Netherlands Brain Bank	0.86	1674500	1317	8
NDD	DN	Hippocampus	HIP	yes	NBB_AD49	Netherlands Brain Bank	0.26	1000000	1420	8
NDD	NEUN	Superior Parietal Cortex	Cortex	yes	NBB_AD49	Netherlands Brain Bank	0.86	2402044	1297	8
NDD	NEUN	Hippocampus	HIP	yes	NBB_AD49	Netherlands Brain Bank	0.26	600000	443	8
NDD	PU1	Superior Parietal Cortex	Cortex	yes	NBB_AD49	Netherlands Brain Bank	0.86	209800	215	8
NDD	PU1	Hippocampus	HIP	yes	NBB_AD49	Netherlands Brain Bank	0.26	246431	231	8
NDD	Blood	Blood	Blood	yes	NBB_AD48	Netherlands Brain Bank			386	8
NDD	DN	Superior Parietal Cortex	Cortex	yes	NBB_AD48	Netherlands Brain Bank	0.28	226099	340	8
NDD	DN	Hippocampus	HIP	yes	NBB_AD48	Netherlands Brain Bank	0	425407	704	8
NDD	NEUN	Superior Parietal Cortex	Cortex	yes	NBB_AD48	Netherlands Brain Bank	0.28	135052	118	8
NDD	NEUN	Hippocampus	HIP	yes	NBB_AD48	Netherlands Brain Bank	0.26	494001	736	8
NDD	PU1	Superior Parietal Cortex	Cortex	yes	NBB_AD48	Netherlands Brain Bank	0.28	53010	77	8
NDD	PU1	Hippocampus	HIP	yes	NBB_AD48	Netherlands Brain Bank	0.26	95500	170	8
NDD	Blood	Blood	Blood	yes	NBB_AD47	Netherlands Brain Bank			412	8
NDD	DN	Superior Parietal Cortex	Cortex	yes	NBB_AD47	Netherlands Brain Bank	0.88	456677	328	8
NDD	DN	Hippocampus	HIP	yes	NBB_AD47	Netherlands Brain Bank	0.31	128986	164	8
NDD	NEUN	Superior Parietal Cortex	Cortex	yes	NBB_AD47	Netherlands Brain Bank	0.88	2090444	1549	8
NDD	NEUN	Hippocampus	HIP	yes	NBB_AD47	Netherlands Brain Bank	0.31	665001	2762	8
NDD	PU1	Superior Parietal Cortex	Cortex	yes	NBB_AD47	Netherlands Brain Bank	0.88	134300	47	8
NDD	PU1	Hippocampus	HIP	yes	NBB_AD47	Netherlands Brain Bank	0.31	77800	60	8
NDD	Blood	Blood	Blood	yes	NBB_AD46	Netherlands Brain Bank			313	8
NDD	DN	Superior Parietal Cortex	Cortex	yes	NBB_AD46	Netherlands Brain Bank	0.24	427894	1072	8
NDD	DN	Hippocampus	HIP	yes	NBB_AD46	Netherlands Brain Bank	0.25	42000	43	8
NDD	NEUN	Superior Parietal Cortex	Cortex	yes	NBB_AD46	Netherlands Brain Bank	0.24	378612	574	8
NDD	NEUN	Hippocampus	HIP	yes	NBB_AD46	Netherlands Brain Bank	0.25	369611	197	8
NDD	PU1	Superior Parietal Cortex	Cortex	yes	NBB_AD46	Netherlands Brain Bank	0.24	108055	116	8
NDD	PU1	Hippocampus	HIP	yes	NBB_AD46	Netherlands Brain Bank	0.25	64044	45	8
NDD	Blood	Blood	Blood	yes	NBB_AD45	Netherlands Brain Bank			991.16	8
NDD	DN	Superior Parietal Cortex	Cortex	yes	NBB_AD45	Netherlands Brain Bank	0.86	849032	637	8
NDD	DN	Hippocampus	HIP	yes	NBB_AD45	Netherlands Brain Bank	0.73	979400	964	8
NDD	NEUN	Superior Parietal Cortex	Cortex	yes	NBB_AD45	Netherlands Brain Bank	0.86	1155022	952	8
NDD	NEUN	Hippocampus	HIP	yes	NBB_AD45	Netherlands Brain Bank	0.73	1116201	837	8
NDD	PU1	Superior Parietal Cortex	Cortex	yes	NBB_AD45	Netherlands Brain Bank	0.86	292660	284	8
NDD	PU1	Hippocampus	HIP	yes	NBB_AD45	Netherlands Brain Bank	0.73	334300	219	8
NDD	Blood	Blood	Blood	yes	NBB_AD44	Netherlands Brain Bank			106.02	8
NDD	DN	Superior Parietal Cortex	Cortex	yes	NBB_AD44	Netherlands Brain Bank	0.57	991800	875.74	8
NDD	DN	Hippocampus	HIP	yes	NBB_AD44	Netherlands Brain Bank	0.29	624999	809.13	8
NDD	NEUN	Superior Parietal Cortex	Cortex	yes	NBB_AD44	Netherlands Brain Bank	0.57	983030	883.93	8
NDD	NEUN	Hippocampus	HIP	yes	NBB_AD44	Netherlands Brain Bank	0.29	630501	727.64	8
NDD	PU1	Superior Parietal Cortex	Cortex	yes	NBB_AD44	Netherlands Brain Bank	0.57	290541	344.55	8
NDD	PU1	Hippocampus	HIP	yes	NBB_AD44	Netherlands Brain Bank	0.29	278066	299.84	8
NDD	Blood	Blood	Blood	yes	NBB_AD43	Netherlands Brain Bank			1641.21	8
NDD	DN	Superior Parietal Cortex	Cortex	yes	NBB_AD43	Netherlands Brain Bank	0.24	805588	538.39	8
NDD	DN	Hippocampus	HIP	yes	NBB_AD43	Netherlands Brain Bank	0.4	320554	434.17	8
NDD	NEUN	Superior Parietal Cortex	Cortex	yes	NBB_AD43	Netherlands Brain Bank	0.24	808009	1119.4	8
NDD	NEUN	Hippocampus	HIP	yes	NBB_AD43	Netherlands Brain Bank	0.4	290551	355.4	8
NDD	PU1	Superior Parietal Cortex	Cortex	yes	NBB_AD43	Netherlands Brain Bank	0.24	307812	261.4	8
NDD	PU1	Hippocampus	HIP	yes	NBB_AD43	Netherlands Brain Bank	0.4	139004	190.66	8
NDD	Blood	Blood	Blood	yes	NBB_AD42	Netherlands Brain Bank			668.54	8
NDD	DN	Superior Parietal Cortex	Cortex	yes	NBB_AD42	Netherlands Brain Bank	0.32	904100	1072.14	8
NDD	DN	Hippocampus	HIP	yes	NBB_AD42	Netherlands Brain Bank	0.24	142345	71.26	8
NDD	NEUN	Superior Parietal Cortex	Cortex	yes	NBB_AD42	Netherlands Brain Bank	0.32	915190	1141.68	8
NDD	PU1	Superior Parietal Cortex	Cortex	yes	NBB_AD42	Netherlands Brain Bank	0.32	254010	240.69	8
NDD	PU1	Hippocampus	HIP	yes	NBB_AD42	Netherlands Brain Bank	0.24	98800	37.87	8
NDD	Blood	Blood	Blood	yes	NBB_AD41	Netherlands Brain Bank			747.44	8
NDD	DN	Superior Parietal Cortex	Cortex	yes	NBB_AD41	Netherlands Brain Bank	0.59	549.2	708000	8
NDD	DN	Hippocampus	HIP	yes	NBB_AD41	Netherlands Brain Bank	1.12	549208	736.51	8
NDD	NEUN	Superior Parietal Cortex	Cortex	yes	NBB_AD41	Netherlands Brain Bank	0.59	879567	1529	8
NDD	NEUN	Hippocampus	HIP	yes	NBB_AD41	Netherlands Brain Bank	1.12	969503	1260.45	8
NDD	PU1	Superior Parietal Cortex	Cortex	yes	NBB_AD41	Netherlands Brain Bank	0.59	80400	79	8
NDD	PU1	Hippocampus	HIP	yes	NBB_AD41	Netherlands Brain Bank	1.12	90605	136.98	8
NDD	Blood	Blood	Blood	yes	NBB_AD40	Netherlands Brain Bank			1151.78	8
NDD	DN	Superior Parietal Cortex	Cortex	yes	NBB_AD40	Netherlands Brain Bank	0.26	355945	428.23	8
NDD	DN	Hippocampus	HIP	yes	NBB_AD40	Netherlands Brain Bank	0.32	311044	508.08	8
NDD	NEUN	Superior Parietal Cortex	Cortex	yes	NBB_AD40	Netherlands Brain Bank	0.26	406709	279.32	8
NDD	NEUN	Hippocampus	HIP	yes	NBB_AD40	Netherlands Brain Bank	0.32	330000	276.85	8
NDD	PU1	Superior Parietal Cortex	Cortex	yes	NBB_AD40	Netherlands Brain Bank	0.26	106000	84.29	8
NDD	PU1	Hippocampus	HIP	yes	NBB_AD40	Netherlands Brain Bank	0.32	104000	131.52	8
NDD	Blood	Blood	Blood	yes	NBB_AD39	Netherlands Brain Bank			817.02	8
NDD	DN	Superior Parietal Cortex	Cortex	yes	NBB_AD39	Netherlands Brain Bank	0.77	560346	674.43	8
NDD	DN	Hippocampus	HIP	yes	NBB_AD39	Netherlands Brain Bank	0.78	180609	332.02	8
NDD	NEUN	Superior Parietal Cortex	Cortex	yes	NBB_AD39	Netherlands Brain Bank	0.77	2185707	2487.92	8
NDD	NEUN	Hippocampus	HIP	yes	NBB_AD39	Netherlands Brain Bank	0.78	834345	2213.22	8
NDD	PU1	Superior Parietal Cortex	Cortex	yes	NBB_AD39	Netherlands Brain Bank	0.77	81900	65.24	8
NDD	PU1	Hippocampus	HIP	yes	NBB_AD39	Netherlands Brain Bank	0.78	101301	202.77	8
NDD	DN	Superior Parietal Cortex	Cortex	no	NBB_AD38	Netherlands Brain Bank	1.03	393125	441.46	8
NDD	DN	Hippocampus	HIP	no	NBB_AD38	Netherlands Brain Bank	0.48	324550	770.45	8
NDD	NEUN	Superior Parietal Cortex	Cortex	no	NBB_AD38	Netherlands Brain Bank	1.03	441976	427.07	8
NDD	NEUN	Hippocampus	HIP	no	NBB_AD38	Netherlands Brain Bank	0.48	179055	265.04	8
NDD	PU1	Superior Parietal Cortex	Cortex	no	NBB_AD38	Netherlands Brain Bank	1.03	126071	247.24	8
NDD	PU1	Hippocampus	HIP	no	NBB_AD38	Netherlands Brain Bank	0.48	115500	253.91	8
NDD	Blood	Blood	Blood	yes	NBB_AD37	Netherlands Brain Bank			285.11	8
NDD	DN	Superior Parietal Cortex	Cortex	yes	NBB_AD37	Netherlands Brain Bank	0.62	304587	290	8
NDD	DN	Hippocampus	HIP	yes	NBB_AD37	Netherlands Brain Bank	0.56	445500	625	8
NDD	NEUN	Superior Parietal Cortex	Cortex	yes	NBB_AD37	Netherlands Brain Bank	0.62	641034	969	8
NDD	NEUN	Hippocampus	HIP	yes	NBB_AD37	Netherlands Brain Bank	0.56	421500	943	8
NDD	PU1	Superior Parietal Cortex	Cortex	yes	NBB_AD37	Netherlands Brain Bank	0.62	75600	34	8
NDD	PU1	Hippocampus	HIP	yes	NBB_AD37	Netherlands Brain Bank	0.56	93000	58	8
NDD	Blood	Blood	Blood	yes	NBB_AD36	Netherlands Brain Bank			1166.38	8
NDD	DN	Superior Parietal Cortex	Cortex	yes	NBB_AD36	Netherlands Brain Bank	0.8	708422	422	8
NDD	DN	Hippocampus	HIP	yes	NBB_AD36	Netherlands Brain Bank	0.43	537088	293	8
NDD	NEUN	Superior Parietal Cortex	Cortex	yes	NBB_AD36	Netherlands Brain Bank	0.8	1022334	976	8
NDD	NEUN	Hippocampus	HIP	yes	NBB_AD36	Netherlands Brain Bank	0.43	519511	214	8
NDD	PU1	Superior Parietal Cortex	Cortex	yes	NBB_AD36	Netherlands Brain Bank	0.8	149900	182	8
NDD	PU1	Hippocampus	HIP	yes	NBB_AD36	Netherlands Brain Bank	0.43	119000	60	8
NDD	Blood	Blood	Blood	yes	NBB_AD35	Netherlands Brain Bank			662.45	8
NDD	DN	Superior Parietal Cortex	Cortex	yes	NBB_AD35	Netherlands Brain Bank	0.32	942444	615	8
NDD	DN	Hippocampus	HIP	yes	NBB_AD35	Netherlands Brain Bank	0.23	614451	724	8
NDD	NEUN	Superior Parietal Cortex	Cortex	yes	NBB_AD35	Netherlands Brain Bank	0.32	865404	399	8
NDD	NEUN	Hippocampus	HIP	yes	NBB_AD35	Netherlands Brain Bank	0.23	256023	323	8
NDD	PU1	Superior Parietal Cortex	Cortex	yes	NBB_AD35	Netherlands Brain Bank	0.32	187500	257	8
NDD	PU1	Hippocampus	HIP	yes	NBB_AD35	Netherlands Brain Bank	0.23	139273	191	8
NDD	DN	Superior Parietal Cortex	Cortex	no	NBB_AD34	Netherlands Brain Bank	0.78	832555	1013	8
NDD	DN	Hippocampus	HIP	no	NBB_AD34	Netherlands Brain Bank	0.94	724001	597	8
NDD	NEUN	Superior Parietal Cortex	Cortex	no	NBB_AD34	Netherlands Brain Bank	0.78	1370678	1011	8
NDD	NEUN	Hippocampus	HIP	no	NBB_AD34	Netherlands Brain Bank	0.94	516000	491	8
NDD	PU1	Superior Parietal Cortex	Cortex	no	NBB_AD34	Netherlands Brain Bank	0.78	158089	163	8
NDD	PU1	Hippocampus	HIP	no	NBB_AD34	Netherlands Brain Bank	0.94	173000	197	8
NDD	Blood	Blood	Blood	yes	NBB_AD33	Netherlands Brain Bank			2925	8
NDD	DN	Superior Parietal Cortex	Cortex	yes	NBB_AD33	Netherlands Brain Bank	0.66	880301	808	8
NDD	DN	Hippocampus	HIP	yes	NBB_AD33	Netherlands Brain Bank	0.31	655389	273.4	8
NDD	NEUN	Superior Parietal Cortex	Cortex	yes	NBB_AD33	Netherlands Brain Bank	0.66	1854101	4549.77	8
NDD	NEUN	Hippocampus	HIP	yes	NBB_AD33	Netherlands Brain Bank	0.31	332600	345.79	8
NDD	PU1	Superior Parietal Cortex	Cortex	yes	NBB_AD33	Netherlands Brain Bank	0.66	153500	212	8
NDD	PU1	Hippocampus	HIP	yes	NBB_AD33	Netherlands Brain Bank	0.31	292606	76	8
NDD	Blood	Blood	Blood	yes	NBB_AD32	Netherlands Brain Bank			277.1	8
NDD	DN	Superior Parietal Cortex	Cortex	yes	NBB_AD32	Netherlands Brain Bank	1.36	893700	1229	8
NDD	DN	Hippocampus	HIP	yes	NBB_AD32	Netherlands Brain Bank	0.63	410240	359	8
NDD	NEUN	Superior Parietal Cortex	Cortex	yes	NBB_AD32	Netherlands Brain Bank	1.36	714001	396	8
NDD	NEUN	Hippocampus	HIP	yes	NBB_AD32	Netherlands Brain Bank	0.63	611000	525	8
NDD	PU1	Superior Parietal Cortex	Cortex	yes	NBB_AD32	Netherlands Brain Bank	1.36	190711	220	8
NDD	PU1	Hippocampus	HIP	yes	NBB_AD32	Netherlands Brain Bank	0.63	166500	247	8
NDD	Blood	Blood	Blood	yes	NBB_AD31	Netherlands Brain Bank			164.55	8
NDD	DN	Superior Parietal Cortex	Cortex	yes	NBB_AD31	Netherlands Brain Bank	0.78	319333	318	8
NDD	DN	Hippocampus	HIP	yes	NBB_AD31	Netherlands Brain Bank	0.23	1040590	712	8
NDD	NEUN	Superior Parietal Cortex	Cortex	yes	NBB_AD31	Netherlands Brain Bank	0.78	1091789	1429	8
NDD	NEUN	Hippocampus	HIP	yes	NBB_AD31	Netherlands Brain Bank	0.23	524067	792	8
NDD	PU1	Superior Parietal Cortex	Cortex	yes	NBB_AD31	Netherlands Brain Bank	0.78	82255	134	8
NDD	PU1	Hippocampus	HIP	yes	NBB_AD31	Netherlands Brain Bank	0.23	155801	335	8
NDD	Blood	Blood	Blood	yes	NBB_AD30	Netherlands Brain Bank			37957.2	8
NDD	DN	Superior Parietal Cortex	Cortex	yes	NBB_AD30	Netherlands Brain Bank	0.78	812463	565	8
NDD	DN	Hippocampus	HIP	yes	NBB_AD30	Netherlands Brain Bank	1.2	498102	463	8
NDD	NEUN	Superior Parietal Cortex	Cortex	yes	NBB_AD30	Netherlands Brain Bank	0.78	3357601	2783	8
NDD	NEUN	Hippocampus	HIP	yes	NBB_AD30	Netherlands Brain Bank	1.2	958000	1435	8
NDD	PU1	Superior Parietal Cortex	Cortex	yes	NBB_AD30	Netherlands Brain Bank	0.78	93156	185	8
NDD	PU1	Hippocampus	HIP	yes	NBB_AD30	Netherlands Brain Bank	1.2	112917	83	8
NDD	DN	Superior Parietal Cortex	Cortex	no	NBB_AD29	Netherlands Brain Bank	0.68	293000	340.2	8
NDD	DN	Hippocampus	HIP	no	NBB_AD29	Netherlands Brain Bank	0.21	209044	340.6	8
NDD	NEUN	Superior Parietal Cortex	Cortex	no	NBB_AD29	Netherlands Brain Bank	0.68	1362511	1115.3	8
NDD	NEUN	Hippocampus	HIP	no	NBB_AD29	Netherlands Brain Bank	0.21	511841	421	8
NDD	PU1	Superior Parietal Cortex	Cortex	no	NBB_AD29	Netherlands Brain Bank	0.68	84416	67.5	8
NDD	PU1	Hippocampus	HIP	no	NBB_AD29	Netherlands Brain Bank	0.21	66744	119.2	8
NDD	Blood	Blood	Blood	yes	NBB_AD28	Netherlands Brain Bank			1705.35	8
NDD	DN	Superior Parietal Cortex	Cortex	yes	NBB_AD28	Netherlands Brain Bank	0.44	444350	447.9	8
NDD	DN	Hippocampus	HIP	yes	NBB_AD28	Netherlands Brain Bank	0.4	336001	447.9	8
NDD	NEUN	Superior Parietal Cortex	Cortex	yes	NBB_AD28	Netherlands Brain Bank	0.44	733389	347.8	8
NDD	NEUN	Hippocampus	HIP	yes	NBB_AD28	Netherlands Brain Bank	0.4	644055	347.8	8
NDD	PU1	Superior Parietal Cortex	Cortex	yes	NBB_AD28	Netherlands Brain Bank	0.44	68010	79	8
NDD	PU1	Hippocampus	HIP	yes	NBB_AD28	Netherlands Brain Bank	0.4	92400	63.8	8
NDD	Blood	Blood	Blood	yes	NBB_AD27	Netherlands Brain Bank			64447.6	8
NDD	DN	Superior Parietal Cortex	Cortex	yes	NBB_AD27	Netherlands Brain Bank	0.41	397600	476.1	8
NDD	DN	Hippocampus	HIP	yes	NBB_AD27	Netherlands Brain Bank	0.36	237305	323	8
NDD	NEUN	Superior Parietal Cortex	Cortex	yes	NBB_AD27	Netherlands Brain Bank	0.41	1584588	1393.4	8
NDD	NEUN	Hippocampus	HIP	yes	NBB_AD27	Netherlands Brain Bank	0.36	1980000	2002.5	8
NDD	PU1	Superior Parietal Cortex	Cortex	yes	NBB_AD27	Netherlands Brain Bank	0.41	79230	79	8
NDD	PU1	Hippocampus	HIP	yes	NBB_AD27	Netherlands Brain Bank	0.36	86300	101.6	8
NDD	Blood	Blood	Blood	yes	NBB_AD26	Netherlands Brain Bank			1651.67	8
NDD	DN	Superior Parietal Cortex	Cortex	yes	NBB_AD26	Netherlands Brain Bank	0.26	438068	428	8
NDD	DN	Hippocampus	HIP	yes	NBB_AD26	Netherlands Brain Bank	0.27	256390	402.971	8
NDD	NEUN	Superior Parietal Cortex	Cortex	yes	NBB_AD26	Netherlands Brain Bank	0.26	1552489	1700	8
NDD	NEUN	Hippocampus	HIP	yes	NBB_AD26	Netherlands Brain Bank	0.27	779078	493.368	8
NDD	PU1	Superior Parietal Cortex	Cortex	yes	NBB_AD26	Netherlands Brain Bank	0.26	60784	83	8
NDD	PU1	Hippocampus	HIP	yes	NBB_AD26	Netherlands Brain Bank	0.27	114621	216.176	8
NDD	Blood	Blood	Blood	yes	NBB_AD25	Netherlands Brain Bank			43621.7	8
NDD	DN	Superior Parietal Cortex	Cortex	yes	NBB_AD25	Netherlands Brain Bank	0.85	594700	410	8
NDD	DN	Hippocampus	HIP	yes	NBB_AD25	Netherlands Brain Bank	0.29	140327	192	8
NDD	NEUN	Superior Parietal Cortex	Cortex	yes	NBB_AD25	Netherlands Brain Bank	0.85	1448327	727	8
NDD	NEUN	Hippocampus	HIP	yes	NBB_AD25	Netherlands Brain Bank	0.29	356000	355	8
NDD	PU1	Superior Parietal Cortex	Cortex	yes	NBB_AD25	Netherlands Brain Bank	0.85	150320	126	8
NDD	PU1	Hippocampus	HIP	yes	NBB_AD25	Netherlands Brain Bank	0.29	62040	99	8
NDD	Blood	Blood	Blood	yes	NBB_AD24	Netherlands Brain Bank			10004.2	8
NDD	DN	Superior Parietal Cortex	Cortex	yes	NBB_AD24	Netherlands Brain Bank	1.23	2516300	2882	8
NDD	DN	Hippocampus	HIP	yes	NBB_AD24	Netherlands Brain Bank	0.54	236016	161	8
NDD	NEUN	Superior Parietal Cortex	Cortex	yes	NBB_AD24	Netherlands Brain Bank	1.23	3085401	1886	8
NDD	NEUN	Hippocampus	HIP	yes	NBB_AD24	Netherlands Brain Bank	0.54	419727	194	8
NDD	PU1	Superior Parietal Cortex	Cortex	yes	NBB_AD24	Netherlands Brain Bank	1.23	115610	265	8
NDD	PU1	Hippocampus	HIP	yes	NBB_AD24	Netherlands Brain Bank	0.54	67890	115	8
NDD	Blood	Blood	Blood	yes	NBB_AD23	Netherlands Brain Bank			516.76	8
NDD	DN	Superior Parietal Cortex	Cortex	yes	NBB_AD23	Netherlands Brain Bank	0.27	431290	110	8
NDD	DN	Hippocampus	HIP	yes	NBB_AD23	Netherlands Brain Bank	0.33	270775	533	8
NDD	NEUN	Superior Parietal Cortex	Cortex	yes	NBB_AD23	Netherlands Brain Bank	0.27	1300390	282	8
NDD	NEUN	Hippocampus	HIP	yes	NBB_AD23	Netherlands Brain Bank	0.33	347041	249	8
NDD	PU1	Superior Parietal Cortex	Cortex	yes	NBB_AD23	Netherlands Brain Bank	0.27	65711	73	8
NDD	PU1	Hippocampus	HIP	yes	NBB_AD23	Netherlands Brain Bank	0.33	53100	122	8
NDD	Blood	Blood	Blood	yes	NBB_AD22	Netherlands Brain Bank			2691.7	8
NDD	DN	Superior Parietal Cortex	Cortex	yes	NBB_AD22	Netherlands Brain Bank	1.09	378334	245	8
NDD	DN	Hippocampus	HIP	yes	NBB_AD22	Netherlands Brain Bank	0.49	517123	419	8
NDD	NEUN	Superior Parietal Cortex	Cortex	yes	NBB_AD22	Netherlands Brain Bank	1.09	249220	279	8
NDD	NEUN	Hippocampus	HIP	yes	NBB_AD22	Netherlands Brain Bank	0.49	158000	154	8
NDD	PU1	Superior Parietal Cortex	Cortex	yes	NBB_AD22	Netherlands Brain Bank	1.09	73620	106	8
NDD	PU1	Hippocampus	HIP	yes	NBB_AD22	Netherlands Brain Bank	0.49	100461	97	8
NDD	Blood	Blood	Blood	yes	NBB_AD21	Netherlands Brain Bank			1532.88	8
NDD	DN	Superior Parietal Cortex	Cortex	yes	NBB_AD21	Netherlands Brain Bank	1.2	601955	613	8
NDD	DN	Hippocampus	HIP	yes	NBB_AD21	Netherlands Brain Bank	0.9	607598	601	8
NDD	NEUN	Superior Parietal Cortex	Cortex	yes	NBB_AD21	Netherlands Brain Bank	1.2	478650	627	8
NDD	NEUN	Hippocampus	HIP	yes	NBB_AD21	Netherlands Brain Bank	0.9	412986	453	8
NDD	PU1	Superior Parietal Cortex	Cortex	yes	NBB_AD21	Netherlands Brain Bank	1.2	189583	264	8
NDD	PU1	Hippocampus	HIP	yes	NBB_AD21	Netherlands Brain Bank	0.9	183776	227	8
NDD	DN	Hippocampus	HIP	no	NBB_AD20	Netherlands Brain Bank	0.55	219010	323	8
NDD	NEUN	Hippocampus	HIP	no	NBB_AD20	Netherlands Brain Bank	0.55	156006	155	8
NDD	PU1	Hippocampus	HIP	no	NBB_AD20	Netherlands Brain Bank	0.55	241131	306	8
NDD	Blood	Blood	Blood	yes	NBB_AD19	Netherlands Brain Bank			293915	8
NDD	DN	Superior Parietal Cortex	Cortex	yes	NBB_AD19	Netherlands Brain Bank	2	1670044	599	8
NDD	DN	Hippocampus	HIP	yes	NBB_AD19	Netherlands Brain Bank	0.75	250984	234	8
NDD	NEUN	Superior Parietal Cortex	Cortex	yes	NBB_AD19	Netherlands Brain Bank	2	404055	323	8
NDD	NEUN	Hippocampus	HIP	yes	NBB_AD19	Netherlands Brain Bank	0.75	233131	261	8
NDD	PU1	Superior Parietal Cortex	Cortex	yes	NBB_AD19	Netherlands Brain Bank	2	95633	42	8
NDD	PU1	Hippocampus	HIP	yes	NBB_AD19	Netherlands Brain Bank	0.75	94401	76	8
NDD	Blood	Blood	Blood	yes	NBB_AD18	Netherlands Brain Bank			2165.3	8
NDD	DN	Superior Parietal Cortex	Cortex	yes	NBB_AD18	Netherlands Brain Bank	1.2	680503	362	8
NDD	DN	Hippocampus	HIP	yes	NBB_AD18	Netherlands Brain Bank	0.63	289987	222.92	8
NDD	NEUN	Superior Parietal Cortex	Cortex	yes	NBB_AD18	Netherlands Brain Bank	1.2	660500	362	8
NDD	NEUN	Hippocampus	HIP	yes	NBB_AD18	Netherlands Brain Bank	0.63	161000	284.04	8
NDD	PU1	Superior Parietal Cortex	Cortex	yes	NBB_AD18	Netherlands Brain Bank	1.2	110512	118.097	8
NDD	PU1	Hippocampus	HIP	yes	NBB_AD18	Netherlands Brain Bank	0.63	175743	180.92	8
CONTROL	DN	Supramarginal Gyrus (Parietal lobe)	Cortex	yes	control_1	Netherlands Brain Bank	0.74	269536	123	8
CONTROL	DN	Angular Gyrus (Parietal Lobe)	Cortex	yes	control_1	Netherlands Brain Bank	0.24	412000	492	8
CONTROL	NEUN	Supramarginal Gyrus (Parietal lobe)	Cortex	yes	control_1	Netherlands Brain Bank	0.74	1166048	1116	8
CONTROL	NEUN	Angular Gyrus (Parietal Lobe)	Cortex	yes	control_1	Netherlands Brain Bank	0.24	640055	874	8
CONTROL	PU1	Supramarginal Gyrus (Parietal lobe)	Cortex	yes	control_1	Netherlands Brain Bank	0.74	128497	63	8
CONTROL	PU1	Angular Gyrus (Parietal Lobe)	Cortex	yes	control_1	Netherlands Brain Bank	0.24	140789	181	8
CONTROL	Blood	Blood	Blood	yes	control_10	Netherlands Brain Bank			458.07	8
CONTROL	DN	Superior Parietal Cortex	Cortex	yes	control_10	Netherlands Brain Bank	0.22	718000	428.64	8
CONTROL	NEUN	Superior Parietal Cortex	Cortex	yes	control_10	Netherlands Brain Bank	0.22	782412	864.1	8
CONTROL	PU1	Superior Parietal Cortex	Cortex	yes	control_10	Netherlands Brain Bank	0.22	100233	81.77	8
CONTROL	Blood	Blood	Blood	yes	control_11	Netherlands Brain Bank			1765.82	8
CONTROL	DN	Angular Gyrus (Parietal Lobe)	Cortex	yes	control_11	Netherlands Brain Bank	0.5	283330	496.15	8
CONTROL	DN	Superior Parietal Cortex	Cortex	yes	control_11	Netherlands Brain Bank	0.32	209090	156	8
CONTROL	NEUN	Angular Gyrus (Parietal Lobe)	Cortex	yes	control_11	Netherlands Brain Bank	0.5	877783	3601.48	8
CONTROL	NEUN	Superior Parietal Cortex	Cortex	yes	control_11	Netherlands Brain Bank	0.32	600000	986.2	8
CONTROL	PU1	Angular Gyrus (Parietal Lobe)	Cortex	yes	control_11	Netherlands Brain Bank	0.5	112236	384.06	8
CONTROL	PU1	Superior Parietal Cortex	Cortex	yes	control_11	Netherlands Brain Bank	0.32	190750	159.6	8
CONTROL	DN	Superior Parietal Cortex	Cortex	yes	control_12	Netherlands Brain Bank	0.25	630209	508.08	8
CONTROL	DN	Angular Gyrus (Parietal Lobe)	Cortex	yes	control_12	Netherlands Brain Bank	0.55	1540033	566.43	8
CONTROL	NEUN	Superior Parietal Cortex	Cortex	yes	control_12	Netherlands Brain Bank	0.25	703000	276.85	8
CONTROL	NEUN	Angular Gyrus (Parietal Lobe)	Cortex	yes	control_12	Netherlands Brain Bank	0.55	1891690	1145.53	8
CONTROL	PU1	Superior Parietal Cortex	Cortex	yes	control_12	Netherlands Brain Bank	0.25	105054	131.52	8
CONTROL	PU1	Angular Gyrus (Parietal Lobe)	Cortex	yes	control_12	Netherlands Brain Bank	0.55	257000	173.57	8
CONTROL	Blood	Blood	Blood	yes	control_13	Netherlands Brain Bank			489.22	8
CONTROL	DN	Angular Gyrus (Parietal Lobe)	Cortex	yes	control_13	Netherlands Brain Bank	0.51	516180	310.9	8
CONTROL	NEUN	Angular Gyrus (Parietal Lobe)	Cortex	yes	control_13	Netherlands Brain Bank	0.51	904322	744.55	8
CONTROL	PU1	Angular Gyrus (Parietal Lobe)	Cortex	yes	control_13	Netherlands Brain Bank	0.51	89001	137.04	8
CONTROL	Blood	Blood	Blood	yes	control_45	Memorial Sloan Kettering			13265.8	8
CONTROL	DN	Cerebellum	CERE+BS	yes	control_45	Memorial Sloan Kettering	0.15	75007	91.8	8
CONTROL	DN	Parietal Cortex	Cortex	yes	control_45	Memorial Sloan Kettering	0.2	245600	511.6	8
CONTROL	NEUN	Cerebellum	CERE+BS	yes	control_45	Memorial Sloan Kettering	0.15	420456	832.5	8
CONTROL	NEUN	Parietal Cortex	Cortex	yes	control_45	Memorial Sloan Kettering	0.2	270098	336.4	8
CONTROL	PU1	Cerebellum	CERE+BS	yes	control_45	Memorial Sloan Kettering	0.15	15000	25.9	8
CONTROL	PU1	Parietal Cortex	Cortex	yes	control_45	Memorial Sloan Kettering	0.2	125000	212.1	8
CONTROL	Blood	Blood	Blood	yes	control_44	Memorial Sloan Kettering			267.2	8
CONTROL	DN	Cerebellum	CERE+BS	yes	control_44	Memorial Sloan Kettering	0.25	360078	573.8	8
CONTROL	DN	Temporal Cortex	Cortex	yes	control_44	Memorial Sloan Kettering	0.28	184040	243.5	8
CONTROL	DN	Parietal Cortex	Cortex	yes	control_44	Memorial Sloan Kettering	0.27	807809	1481.1	8
CONTROL	DN	Frontal cortex	Cortex	yes	control_44	Memorial Sloan Kettering	0.25	325400	559	8
CONTROL	NEUN	Cerebellum	CERE+BS	yes	control_44	Memorial Sloan Kettering	0.25	440078	655.8	8
CONTROL	NEUN	Temporal Cortex	Cortex	yes	control_44	Memorial Sloan Kettering	0.28	540889	1142.9	8
CONTROL	NEUN	Frontal cortex	Cortex	yes	control_44	Memorial Sloan Kettering	0.25	427044	1023.9	8
CONTROL	NEUN	Parietal Cortex	Cortex	yes	control_44	Memorial Sloan Kettering	0.27	395030	784.5	8
CONTROL	PU1	Cerebellum	CERE+BS	yes	control_44	Memorial Sloan Kettering	0.25	95145	79.7	8
CONTROL	PU1	Parietal Cortex	Cortex	yes	control_44	Memorial Sloan Kettering	0.27	166041	479	8
CONTROL	PU1	Frontal cortex	Cortex	yes	control_44	Memorial Sloan Kettering	0.25	125000	277.7	8
CONTROL	PU1	Temporal Cortex	Cortex	yes	control_44	Memorial Sloan Kettering	0.28	65000	133.6	8
CONTROL	DN	Parietal Cortex	Cortex	no	control_43	Memorial Sloan Kettering	0.41	464449	840.9	8
CONTROL	NEUN	Parietal Cortex	Cortex	no	control_43	Memorial Sloan Kettering	0.41	524635	987	8
CONTROL	PU1	Parietal Cortex	Cortex	no	control_43	Memorial Sloan Kettering	0.41	74264	96.8	8
CONTROL	Blood	Blood	Blood	yes	control_42	Memorial Sloan Kettering			73.8	8
CONTROL	DN	Spinal Cord	CERE+BS	yes	control_42	Memorial Sloan Kettering	0.2	378459	471.7	8
CONTROL	DN	Occipital Cortex	Cortex	yes	control_42	Memorial Sloan Kettering	0.23	457945	456.9	8
CONTROL	DN	Parietal Cortex	Cortex	yes	control_42	Memorial Sloan Kettering	0.35	1001401	894.7	8
CONTROL	DN	Temporal Cortex	Cortex	yes	control_42	Memorial Sloan Kettering	0.4	693067	651.7	8
CONTROL	NEUN	Spinal Cord	CERE+BS	yes	control_42	Memorial Sloan Kettering	0.2	30678	22.9	8
CONTROL	NEUN	Occipital Cortex	Cortex	yes	control_42	Memorial Sloan Kettering	0.23	578054	624	8
CONTROL	NEUN	Temporal Cortex	Cortex	yes	control_42	Memorial Sloan Kettering	0.4	1956843	558.3	8
CONTROL	NEUN	Parietal Cortex	Cortex	yes	control_42	Memorial Sloan Kettering	0.35	564725	324.3	8
CONTROL	PU1	Spinal Cord	CERE+BS	yes	control_42	Memorial Sloan Kettering	0.2	130678	233.3	8
CONTROL	PU1	Parietal Cortex	Cortex	yes	control_42	Memorial Sloan Kettering	0.35	170468	235.1	8
CONTROL	PU1	Occipital Cortex	Cortex	yes	control_42	Memorial Sloan Kettering	0.23	55689	63.9	8
CONTROL	PU1	Temporal Cortex	Cortex	yes	control_42	Memorial Sloan Kettering	0.4	30609	56.5	8
CONTROL	Blood	Blood	Blood	yes	control_41	Memorial Sloan Kettering			5011.1	8
CONTROL	DN	Cerebellum	CERE+BS	yes	control_41	Memorial Sloan Kettering	0.12	90800	141.3	8
CONTROL	DN	Brainstem	CERE+BS	yes	control_41	Memorial Sloan Kettering	0.15	196095	230.4	8
CONTROL	DN	Parietal Cortex	Cortex	yes	control_41	Memorial Sloan Kettering	0.2	267008	343.4	8
CONTROL	NEUN	Cerebellum	CERE+BS	yes	control_41	Memorial Sloan Kettering	0.12	400644	684.2	8
CONTROL	NEUN	Brainstem	CERE+BS	yes	control_41	Memorial Sloan Kettering	0.15	153060	249.6	8
CONTROL	NEUN	Parietal Cortex	Cortex	yes	control_41	Memorial Sloan Kettering	0.2	717000	783.6	8
CONTROL	PU1	Brainstem	CERE+BS	yes	control_41	Memorial Sloan Kettering	0.15	163000	273.8	8
CONTROL	PU1	Cerebellum	CERE+BS	yes	control_41	Memorial Sloan Kettering	0.12	30000	60.1	8
CONTROL	PU1	Parietal Cortex	Cortex	yes	control_41	Memorial Sloan Kettering	0.2	190500	251.7	8
CONTROL	NEUN	Parietal Cortex	Cortex	no	control_39	Memorial Sloan Kettering	0.35	186678	263.6	8
CONTROL	PU1	Parietal Cortex	Cortex	no	control_39	Memorial Sloan Kettering	0.35	140708	63	8
CONTROL	Blood	Blood	Blood	yes	control_37	Memorial Sloan Kettering			4047	8
CONTROL	DN	Cerebellum	CERE+BS	yes	control_37	Memorial Sloan Kettering	0.25	370057	587.8	8
CONTROL	DN	Frontal cortex	Cortex	yes	control_37	Memorial Sloan Kettering	0.15	146643	166.9	8
CONTROL	NEUN	Cerebellum	CERE+BS	yes	control_37	Memorial Sloan Kettering	0.25	800000	1780.3	8
CONTROL	NEUN	Frontal cortex	Cortex	yes	control_37	Memorial Sloan Kettering	0.15	400000	316.5	8
CONTROL	PU1	Cerebellum	CERE+BS	yes	control_37	Memorial Sloan Kettering	0.25	170055	355.7	8
CONTROL	PU1	Frontal cortex	Cortex	yes	control_37	Memorial Sloan Kettering	0.15	141267	234.1	8
CONTROL	Blood	Blood	Blood	yes	control_36	Memorial Sloan Kettering			12430.4	8
CONTROL	DN	Brainstem	CERE+BS	yes	control_36	Memorial Sloan Kettering	0.38	370345	558.3	8
CONTROL	DN	Frontal Cortex	Cortex	yes	control_36	Memorial Sloan Kettering	0.5	360053	417.5	8
CONTROL	DN	Temporal Cortex	Cortex	yes	control_36	Memorial Sloan Kettering	0.3	353124	572.1	8
CONTROL	DN	Occipital Cortex	Cortex	yes	control_36	Memorial Sloan Kettering	0.3	280178	333.9	8
CONTROL	DN	Parietal Cortex	Cortex	yes	control_36	Memorial Sloan Kettering	0.35	613289	728.2	8
CONTROL	NEUN	Brainstem	CERE+BS	yes	control_36	Memorial Sloan Kettering	0.38	50679	59.5	8
CONTROL	NEUN	Frontal Cortex	Cortex	yes	control_36	Memorial Sloan Kettering	0.5	1200000	1590.2	8
CONTROL	NEUN	Parietal Cortex	Cortex	yes	control_36	Memorial Sloan Kettering	0.35	660067	929.2	8
CONTROL	NEUN	Occipital Cortex	Cortex	yes	control_36	Memorial Sloan Kettering	0.3	1250512	1005.9	8
CONTROL	NEUN	Temporal Cortex	Cortex	yes	control_36	Memorial Sloan Kettering	0.3	804000	751.5	8
CONTROL	PU1	Brainstem	CERE+BS	yes	control_36	Memorial Sloan Kettering	0.38	149867	191.2	8
CONTROL	PU1	Frontal Cortex	Cortex	yes	control_36	Memorial Sloan Kettering	0.5	98001	131.3	8
CONTROL	PU1	Parietal Cortex	Cortex	yes	control_36	Memorial Sloan Kettering	0.35	110534	106.5	8
CONTROL	PU1	Occipital Cortex	Cortex	yes	control_36	Memorial Sloan Kettering	0.3	142000	155.6	8
CONTROL	PU1	Temporal Cortex	Cortex	yes	control_36	Memorial Sloan Kettering	0.3	113522	136.7	8
CONTROL	Blood	Blood	Blood	yes	control_35	Memorial Sloan Kettering			45627.4	8
CONTROL	DN	Cerebellum	CERE+BS	yes	control_35	Memorial Sloan Kettering	0.32	78400	29.5	8
CONTROL	DN	Pons	CERE+BS	yes	control_35	Memorial Sloan Kettering	0.31	167446	169	8
CONTROL	DN	Midbrain	CERE+BS	yes	control_35	Memorial Sloan Kettering	0.25	117040	144.9	8
CONTROL	DN	Temporal Cortex	Cortex	yes	control_35	Memorial Sloan Kettering	0.15	56066	54	8
CONTROL	DN	Frontal Cortex	Cortex	yes	control_35	Memorial Sloan Kettering	0.26	485055	598.7	8
CONTROL	DN	Parietal Cortex	Cortex	yes	control_35	Memorial Sloan Kettering	0.44	186976	232.3	8
CONTROL	NEUN	Cerebellum	CERE+BS	yes	control_35	Memorial Sloan Kettering	0.32	207055	543.3	8
CONTROL	NEUN	Pons	CERE+BS	yes	control_35	Memorial Sloan Kettering	0.31	217006	199.9	8
CONTROL	NEUN	Midbrain	CERE+BS	yes	control_35	Memorial Sloan Kettering	0.25	49000	60.3	8
CONTROL	NEUN	Temporal Cortex	Cortex	yes	control_35	Memorial Sloan Kettering	0.15	295000	443.2	8
CONTROL	NEUN	Frontal Cortex	Cortex	yes	control_35	Memorial Sloan Kettering	0.26	1200000	2821.9	8
CONTROL	NEUN	Parietal Cortex	Cortex	yes	control_35	Memorial Sloan Kettering	0.44	610344	847.3	8
CONTROL	PU1	Midbrain	CERE+BS	yes	control_35	Memorial Sloan Kettering	0.25	80700	69.1	8
CONTROL	PU1	Cerebellum	CERE+BS	yes	control_35	Memorial Sloan Kettering	0.32	132512	122	8
CONTROL	PU1	Pons	CERE+BS	yes	control_35	Memorial Sloan Kettering	0.31	90000	70.1	8
CONTROL	PU1	Temporal Cortex	Cortex	yes	control_35	Memorial Sloan Kettering	0.15	52400	70.7	8
CONTROL	PU1	Parietal Cortex	Cortex	yes	control_35	Memorial Sloan Kettering	0.44	58489	54.2	8
CONTROL	PU1	Frontal Cortex	Cortex	yes	control_35	Memorial Sloan Kettering	0.26	81044	124.6	8
CONTROL	Blood	Blood	Blood	yes	control_34	Memorial Sloan Kettering			8317.2	8
CONTROL	DN	Brainstem	CERE+BS	yes	control_34	Memorial Sloan Kettering	0.4	167510	102.91	8
CONTROL	DN	Cerebellum	CERE+BS	yes	control_34	Memorial Sloan Kettering	0.35	148999	211.11	8
CONTROL	DN	Frontal Cortex	Cortex	yes	control_34	Memorial Sloan Kettering	0.3	458345	634.84	8
CONTROL	DN	Parietal Cortex	Cortex	yes	control_34	Memorial Sloan Kettering	0.42	246330	346.42	8
CONTROL	DN	Hippocampus	HIP	yes	control_34	Memorial Sloan Kettering	0.31	158044	255.88	8
CONTROL	NEUN	Brainstem	CERE+BS	yes	control_34	Memorial Sloan Kettering	0.4	246541	244.65	8
CONTROL	NEUN	Cerebellum	CERE+BS	yes	control_34	Memorial Sloan Kettering	0.35	1076089	3223.5	8
CONTROL	NEUN	Frontal Cortex	Cortex	yes	control_34	Memorial Sloan Kettering	0.3	1028077	2419.8	8
CONTROL	NEUN	Parietal Cortex	Cortex	yes	control_34	Memorial Sloan Kettering	0.42	569500	1389.86	8
CONTROL	NEUN	Hippocampus	HIP	yes	control_34	Memorial Sloan Kettering	0.31	507612	638.37	8
CONTROL	PU1	Cerebellum	CERE+BS	yes	control_34	Memorial Sloan Kettering	0.35	54055	49.06	8
CONTROL	PU1	Brainstem	CERE+BS	yes	control_34	Memorial Sloan Kettering	0.4	111633	132.54	8
CONTROL	PU1	Frontal Cortex	Cortex	yes	control_34	Memorial Sloan Kettering	0.3	160201	438.36	8
CONTROL	PU1	Parietal Cortex	Cortex	yes	control_34	Memorial Sloan Kettering	0.42	103999	221.07	8
CONTROL	PU1	Hippocampus	HIP	yes	control_34	Memorial Sloan Kettering	0.31	113677	212.87	8
CONTROL	Blood	Blood	Blood	yes	control_33	Memorial Sloan Kettering			15109.7	8
CONTROL	DN	Brainstem	CERE+BS	yes	control_33	Memorial Sloan Kettering	0.26	300401	578.7	8
CONTROL	DN	Cerebellum (L)	CERE+BS	yes	control_33	Memorial Sloan Kettering	0.2	263003	321.1	8
CONTROL	DN	Cerebellum (R)	CERE+BS	yes	control_33	Memorial Sloan Kettering	0.12	133005	89	8
CONTROL	DN	Midbrain	CERE+BS	yes	control_33	Memorial Sloan Kettering	0.32	373599	578.7	8
CONTROL	DN	Pons	CERE+BS	yes	control_33	Memorial Sloan Kettering	0.26	360432	663.1	8
CONTROL	DN	Frontal Cortex	Cortex	yes	control_33	Memorial Sloan Kettering	0.3	713985	1323.1	8
CONTROL	DN	Parietal Cortex	Cortex	yes	control_33	Memorial Sloan Kettering	0.3	356678	425	8
CONTROL	DN	Parietal Cortex (L)	Cortex	yes	control_33	Memorial Sloan Kettering	0.26	903490	1025.9	8
CONTROL	DN	Temporal Cortex	Cortex	yes	control_33	Memorial Sloan Kettering	0.25	295523	799.9	8
CONTROL	NEUN	Brainstem	CERE+BS	yes	control_33	Memorial Sloan Kettering	0.26	412066	1117.8	8
CONTROL	NEUN	Cerebellum (L)	CERE+BS	yes	control_33	Memorial Sloan Kettering	0.2	425005	783.4	8
CONTROL	NEUN	Midbrain	CERE+BS	yes	control_33	Memorial Sloan Kettering	0.32	745567	1255.8	8
CONTROL	NEUN	Pons	CERE+BS	yes	control_33	Memorial Sloan Kettering	0.26	22000	21.4	8
CONTROL	NEUN	Frontal Cortex	Cortex	yes	control_33	Memorial Sloan Kettering	0.3	1300000	1785.1	8
CONTROL	NEUN	Parietal Cortex (L)	Cortex	yes	control_33	Memorial Sloan Kettering	0.26	673000	887.2	8
CONTROL	NEUN	Temporal Cortex	Cortex	yes	control_33	Memorial Sloan Kettering	0.25	852612	1223.3	8
CONTROL	PU1	Brainstem	CERE+BS	yes	control_33	Memorial Sloan Kettering	0.26	275931	589.3	8
CONTROL	PU1	Cerebellum (L)	CERE+BS	yes	control_33	Memorial Sloan Kettering	0.2	63563	66.4	8
CONTROL	PU1	Cerebellum (R)	CERE+BS	yes	control_33	Memorial Sloan Kettering	0.12	92044	138.1	8
CONTROL	PU1	Midbrain	CERE+BS	yes	control_33	Memorial Sloan Kettering	0.32	151412	201	8
CONTROL	PU1	Pons	CERE+BS	yes	control_33	Memorial Sloan Kettering	0.26	26889	470.9	8
CONTROL	PU1	Frontal Cortex	Cortex	yes	control_33	Memorial Sloan Kettering	0.3	155347	295.7	8
CONTROL	PU1	Parietal Cortex	Cortex	yes	control_33	Memorial Sloan Kettering	0.3	96569	124.1	8
CONTROL	PU1	Parietal Cortex (L)	Cortex	yes	control_33	Memorial Sloan Kettering	0.26	141033	184.8	8
CONTROL	PU1	Temporal Cortex	Cortex	yes	control_33	Memorial Sloan Kettering	0.25	128999	206.1	8
CONTROL	Blood	Blood	Blood	yes	control_32	Memorial Sloan Kettering			17216.6	8
CONTROL	DN	Parietal Cortex	Cortex	yes	control_32	Memorial Sloan Kettering	0.25	78010	67.5	8
CONTROL	NEUN	Parietal Cortex	Cortex	yes	control_32	Memorial Sloan Kettering	0.25	734712	1074.5	8
CONTROL	PU1	Parietal Cortex	Cortex	yes	control_32	Memorial Sloan Kettering	0.25	48044	45.7	8
CONTROL	Blood	Blood	Blood	yes	control_31	Memorial Sloan Kettering			2303.8	8
CONTROL	DN	Parietal Cortex	Cortex	yes	control_31	Memorial Sloan Kettering	0.1	216054	236.5	8
CONTROL	NEUN	Parietal Cortex	Cortex	yes	control_31	Memorial Sloan Kettering	0.1	294788	404.6	8
CONTROL	PU1	Parietal Cortex	Cortex	yes	control_31	Memorial Sloan Kettering	0.1	54633	50.4	8
CONTROL	Blood	Blood	Blood	yes	control_30	Memorial Sloan Kettering			15872.9	8
CONTROL	DN	Cerebellum	CERE+BS	yes	control_30	Memorial Sloan Kettering	0.59	243452	374.67	8
CONTROL	DN	Parietal Cortex	Cortex	yes	control_30	Memorial Sloan Kettering	0.36	660088	692.6	8
CONTROL	DN	Frontal Cortex	Cortex	yes	control_30	Memorial Sloan Kettering	0.56	524054	127.5	8
CONTROL	DN	Temporal Cortex	Cortex	yes	control_30	Memorial Sloan Kettering	0.7	360043	227.63	8
CONTROL	NEUN	Cerebellum	CERE+BS	yes	control_30	Memorial Sloan Kettering	0.59	81044	3065.61	8
CONTROL	NEUN	Frontal Cortex	Cortex	yes	control_30	Memorial Sloan Kettering	0.56	1307899	1242.18	8
CONTROL	NEUN	Temporal Cortex	Cortex	yes	control_30	Memorial Sloan Kettering	0.7	722632	1884.84	8
CONTROL	NEUN	Parietal Cortex	Cortex	yes	control_30	Memorial Sloan Kettering	0.36	1293412	1331.85	8
CONTROL	PU1	Cerebellum	CERE+BS	yes	control_30	Memorial Sloan Kettering	0.59	47500	64.32	8
CONTROL	PU1	Temporal Cortex	Cortex	yes	control_30	Memorial Sloan Kettering	0.7	66999	92.19	8
CONTROL	PU1	Frontal Cortex	Cortex	yes	control_30	Memorial Sloan Kettering	0.56	119612	24.72	8
CONTROL	Blood	Blood	Blood	yes	control_14	Netherlands Brain Bank			1209	8
CONTROL	DN	Inferior Parietal Gyrus	Cortex	yes	control_14	Netherlands Brain Bank	0.67	1421033	1413.14	8
CONTROL	DN	Superior Parietal Cortex	Cortex	yes	control_14	Netherlands Brain Bank	0.26	960678	2082	8
CONTROL	NEUN	Inferior Parietal Gyrus	Cortex	yes	control_14	Netherlands Brain Bank	0.67	1820456	2543.05	8
CONTROL	NEUN	Superior Parietal Cortex	Cortex	yes	control_14	Netherlands Brain Bank	0.26	1554999	2009	8
CONTROL	DN	Cerebellum	CERE+BS	no	control_29	Neuro-CEB, Hôpital de la Pitié-Salpêtrière	0.22	180701	215.53	8
CONTROL	DN	Frontal cortex	Cortex	no	control_29	Neuro-CEB, Hôpital de la Pitié-Salpêtrière	0.55	704300	274.4	8
CONTROL	DN	Occipital Cortex	Cortex	no	control_29	Neuro-CEB, Hôpital de la Pitié-Salpêtrière	0.3	631020	1221.92	8
CONTROL	DN	Caudate nucleus	HIP	no	control_29	Neuro-CEB, Hôpital de la Pitié-Salpêtrière	0.19	407890	664.08	8
CONTROL	NEUN	Cerebellum	CERE+BS	no	control_29	Neuro-CEB, Hôpital de la Pitié-Salpêtrière	0.22	526651	1324.97	8
CONTROL	NEUN	Frontal cortex	Cortex	no	control_29	Neuro-CEB, Hôpital de la Pitié-Salpêtrière	0.55	835800	677.36	8
CONTROL	NEUN	Occipital Cortex	Cortex	no	control_29	Neuro-CEB, Hôpital de la Pitié-Salpêtrière	0.3	739000	1436.04	8
CONTROL	NEUN	Caudate nucleus	HIP	no	control_29	Neuro-CEB, Hôpital de la Pitié-Salpêtrière	0.19	202000	505.6	8
CONTROL	PU1	Cerebellum	CERE+BS	no	control_29	Neuro-CEB, Hôpital de la Pitié-Salpêtrière	0.22	33301	34.38	8
CONTROL	PU1	Frontal cortex	Cortex	no	control_29	Neuro-CEB, Hôpital de la Pitié-Salpêtrière	0.55	131000	88.63	8
CONTROL	PU1	Occipital Cortex	Cortex	no	control_29	Neuro-CEB, Hôpital de la Pitié-Salpêtrière	0.3	105000	289.02	8
CONTROL	PU1	Caudate nucleus	HIP	no	control_29	Neuro-CEB, Hôpital de la Pitié-Salpêtrière	0.19	101144	280.8	8
CONTROL	DN	Cerebellum	CERE+BS	no	control_28	Sant Joan de Déu	0.6	540044	714.32	8
CONTROL	DN	Superior Parietal Cortex	Cortex	no	control_28	Sant Joan de Déu	0.34	913999	1618.82	8
CONTROL	DN	Frontal Cortex	Cortex	no	control_28	Sant Joan de Déu	0.12	361871	178.2	8
CONTROL	NEUN	Cerebellum	CERE+BS	no	control_28	Sant Joan de Déu	0.6	1000000	1400.71	8
CONTROL	NEUN	Superior Parietal Cortex	Cortex	no	control_28	Sant Joan de Déu	0.34	1370165	2153.77	8
CONTROL	NEUN	Frontal Cortex	Cortex	no	control_28	Sant Joan de Déu	0.12	1300134	1222.39	8
CONTROL	PU1	Cerebellum	CERE+BS	no	control_28	Sant Joan de Déu	0.6	12033	26.77	8
CONTROL	DN	Cerebellum	CERE+BS	no	control_27	Sant Joan de Déu	0.33	790811	958.85	8
CONTROL	DN	Parietal Cortex	Cortex	no	control_27	Sant Joan de Déu	0.31	7350034	1310.9	8
CONTROL	DN	Temporal Cortex	Cortex	no	control_27	Sant Joan de Déu	0.25	768055	1587.36	8
CONTROL	DN	Frontal cortex	Cortex	no	control_27	Sant Joan de Déu	0.3	606578	759.64	8
CONTROL	DN	Hippocampus	HIP	no	control_27	Sant Joan de Déu	0.21	359223	871.27	8
CONTROL	NEUN	Cerebellum	CERE+BS	no	control_27	Sant Joan de Déu	0.33	2081789	2250.97	8
CONTROL	NEUN	Parietal Cortex	Cortex	no	control_27	Sant Joan de Déu	0.31	1300000	3190.33	8
CONTROL	NEUN	Temporal Cortex	Cortex	no	control_27	Sant Joan de Déu	0.25	1218567	2860.93	8
CONTROL	NEUN	Frontal cortex	Cortex	no	control_27	Sant Joan de Déu	0.3	1316001	2083.57	8
CONTROL	NEUN	Hippocampus	HIP	no	control_27	Sant Joan de Déu	0.21	1340567	2441.85	8
CONTROL	PU1	Parietal Cortex	Cortex	no	control_27	Sant Joan de Déu	0.31	216000	473.44	8
CONTROL	PU1	Temporal Cortex	Cortex	no	control_27	Sant Joan de Déu	0.25	107611	181.25	8
CONTROL	PU1	Frontal cortex	Cortex	no	control_27	Sant Joan de Déu	0.3	133030	246.4	8
CONTROL	PU1	Hippocampus	HIP	no	control_27	Sant Joan de Déu	0.21	48201	63.98	8
CONTROL	DN	Occipital Cortex	Cortex	no	control_26	Neuro-CEB, Hôpital de la Pitié-Salpêtrière	0.28	532000	857.9	8
CONTROL	DN	Frontal cortex	Cortex	no	control_26	Neuro-CEB, Hôpital de la Pitié-Salpêtrière	0.4	918012	1145.65	8
CONTROL	DN	Caudate nucleus	HIP	no	control_26	Neuro-CEB, Hôpital de la Pitié-Salpêtrière	0.27	314700	497.36	8
CONTROL	NEUN	Occipital Cortex	Cortex	no	control_26	Neuro-CEB, Hôpital de la Pitié-Salpêtrière	0.28	750567	1881.42	8
CONTROL	NEUN	Frontal cortex	Cortex	no	control_26	Neuro-CEB, Hôpital de la Pitié-Salpêtrière	0.4	26701	20.35	8
CONTROL	NEUN	Caudate nucleus	HIP	no	control_26	Neuro-CEB, Hôpital de la Pitié-Salpêtrière	0.27	654311	973.36	8
CONTROL	PU1	Frontal cortex	Cortex	no	control_26	Neuro-CEB, Hôpital de la Pitié-Salpêtrière	0.4	206047	445.97	8
CONTROL	PU1	Occipital Cortex	Cortex	no	control_26	Neuro-CEB, Hôpital de la Pitié-Salpêtrière	0.28	235000	461.43	8
CONTROL	PU1	Caudate nucleus	HIP	no	control_26	Neuro-CEB, Hôpital de la Pitié-Salpêtrière	0.27	109000	117.51	8
CONTROL	Blood	Blood	Blood	yes	control_25	Memorial Sloan Kettering			1388	8
CONTROL	DN	Pons	CERE+BS	yes	control_25	Memorial Sloan Kettering	0.42	194789	284.35	8
CONTROL	DN	Cerebellum	CERE+BS	yes	control_25	Memorial Sloan Kettering	0.38	250956	275.7	8
CONTROL	DN	Temporal Cortex	Cortex	yes	control_25	Memorial Sloan Kettering	0.19	805679	530.75	8
CONTROL	DN	Frontal Cortex	Cortex	yes	control_25	Memorial Sloan Kettering	0.24	153347	221.37	8
CONTROL	DN	Parietal Cortex	Cortex	yes	control_25	Memorial Sloan Kettering	0.35	825267	1461	8
CONTROL	NEUN	Cerebellum	CERE+BS	yes	control_25	Memorial Sloan Kettering	0.38	1000000	2693	8
CONTROL	NEUN	Pons	CERE+BS	yes	control_25	Memorial Sloan Kettering	0.42	23060	38.14	8
CONTROL	NEUN	Parietal Cortex	Cortex	yes	control_25	Memorial Sloan Kettering	0.35	930791	1081	8
CONTROL	NEUN	Temporal Cortex	Cortex	yes	control_25	Memorial Sloan Kettering	0.19	180334	186.64	8
CONTROL	NEUN	Frontal Cortex	Cortex	yes	control_25	Memorial Sloan Kettering	0.24	514777	1018	8
CONTROL	PU1	Cerebellum	CERE+BS	yes	control_25	Memorial Sloan Kettering	0.38	47765	57.07	8
CONTROL	PU1	Pons	CERE+BS	yes	control_25	Memorial Sloan Kettering	0.42	69011	93.85	8
CONTROL	PU1	Temporal Cortex	Cortex	yes	control_25	Memorial Sloan Kettering	0.19	207145	191.72	8
CONTROL	PU1	Parietal Cortex	Cortex	yes	control_25	Memorial Sloan Kettering	0.35	223200	108	8
CONTROL	PU1	Frontal Cortex	Cortex	yes	control_25	Memorial Sloan Kettering	0.24	60000	66.27	8
CONTROL	Blood	Blood	Blood	yes	control_24	Memorial Sloan Kettering			326.76	8
CONTROL	DN	Frontal Cortex	Cortex	yes	control_24	Memorial Sloan Kettering	0.3	135909	157.86	8
CONTROL	DN	Choroid Plexus	OTHER	yes	control_24	Memorial Sloan Kettering	0.11	703456	571.29	8
CONTROL	NEUN	Frontal Cortex	Cortex	yes	control_24	Memorial Sloan Kettering	0.3	345060	630.57	8
CONTROL	PU1	Frontal Cortex	Cortex	yes	control_24	Memorial Sloan Kettering	0.3	69090	139.49	8
CONTROL	PU1	Choroid Plexus	OTHER	yes	control_24	Memorial Sloan Kettering	0.11	84545	63.87	8
CONTROL	DN	Temporal Cortex	Cortex	no	control_23	Sant Joan de Déu	0.15	622002	585.66	8
CONTROL	DN	Parietal Cortex	Cortex	no	control_23	Sant Joan de Déu	0.12	260055	555.78	8
CONTROL	DN	Frontal cortex	Cortex	no	control_23	Sant Joan de Déu	0.18	806000	752.99	8
CONTROL	DN	Hippocampus	HIP	no	control_23	Sant Joan de Déu	0.41	1272245	846.11	8
CONTROL	NEUN	Temporal Cortex	Cortex	no	control_23	Sant Joan de Déu	0.15	1067789	2353.14	8
CONTROL	NEUN	Parietal Cortex	Cortex	no	control_23	Sant Joan de Déu	0.12	1083489	3569.21	8
CONTROL	NEUN	Frontal cortex	Cortex	no	control_23	Sant Joan de Déu	0.18	1500456	2959.86	8
CONTROL	NEUN	Hippocampus	HIP	no	control_23	Sant Joan de Déu	0.41	2781234	2141.78	8
CONTROL	PU1	Temporal Cortex	Cortex	no	control_23	Sant Joan de Déu	0.15	68300	69.91	8
CONTROL	PU1	Parietal Cortex	Cortex	no	control_23	Sant Joan de Déu	0.12	127234	197.38	8
CONTROL	PU1	Frontal cortex	Cortex	no	control_23	Sant Joan de Déu	0.18	270456	375	8
CONTROL	PU1	Hippocampus	HIP	no	control_23	Sant Joan de Déu	0.41	100726	95.4	8
CONTROL	Blood	Blood	Blood	yes	control_22	Memorial Sloan Kettering			27451	8
CONTROL	DN	Frontal Cortex	Cortex	yes	control_22	Memorial Sloan Kettering	0.45	1000000	857	8
CONTROL	DN	Hippocampus	HIP	yes	control_22	Memorial Sloan Kettering	0.45	352443	197	8
CONTROL	NEUN	Frontal Cortex	Cortex	yes	control_22	Memorial Sloan Kettering	0.45	1000000	766	8
CONTROL	NEUN	Hippocampus	HIP	yes	control_22	Memorial Sloan Kettering	0.45	569053	603	8
CONTROL	PU1	Frontal Cortex	Cortex	yes	control_22	Memorial Sloan Kettering	0.45	165999	202	8
CONTROL	PU1	Hippocampus	HIP	yes	control_22	Memorial Sloan Kettering	0.45	510055	423	8
CONTROL	Blood	Blood	Blood	yes	control_21	Memorial Sloan Kettering			686	8
CONTROL	DN	Frontal Cortex	Cortex	yes	control_21	Memorial Sloan Kettering	0.64	848366	972.09	8
CONTROL	DN	Hippocampus	HIP	yes	control_21	Memorial Sloan Kettering	0.56	639097	949.4	8
CONTROL	NEUN	Frontal Cortex	Cortex	yes	control_21	Memorial Sloan Kettering	0.64	1014076	857.9	8
CONTROL	NEUN	Hippocampus	HIP	yes	control_21	Memorial Sloan Kettering	0.56	553000	369.64	8
CONTROL	PU1	Frontal Cortex	Cortex	yes	control_21	Memorial Sloan Kettering	0.64	191665	228.69	8
CONTROL	PU1	Hippocampus	HIP	yes	control_21	Memorial Sloan Kettering	0.56	190451	291.55	8
CONTROL	Blood	Blood	Blood	yes	control_20	Human Brain Collection Core (HBCC, NIH)			17317	8
CONTROL	DN	Pons	CERE+BS	yes	control_20	Human Brain Collection Core (HBCC, NIH)	0.41	587090	482	8
CONTROL	DN	Midbrain	CERE+BS	yes	control_20	Human Brain Collection Core (HBCC, NIH)	0.43	267980	198	8
CONTROL	DN	Medulla	CERE+BS	yes	control_20	Human Brain Collection Core (HBCC, NIH)	0.31	982067	1397	8
CONTROL	DN	Frontal Cortex	Cortex	yes	control_20	Human Brain Collection Core (HBCC, NIH)	0.42	600789	790	8
CONTROL	DN	Temporal Cortex	Cortex	yes	control_20	Human Brain Collection Core (HBCC, NIH)	0.36	800000	1251	8
CONTROL	DN	Hippocampus	HIP	yes	control_20	Human Brain Collection Core (HBCC, NIH)	0.6	650002	530	8
CONTROL	DN	Amygdala	HIP	yes	control_20	Human Brain Collection Core (HBCC, NIH)	0.46	838077	966	8
CONTROL	NEUN	Pons	CERE+BS	yes	control_20	Human Brain Collection Core (HBCC, NIH)	0.41	384567	252	8
CONTROL	NEUN	Midbrain	CERE+BS	yes	control_20	Human Brain Collection Core (HBCC, NIH)	0.43	319985	343	8
CONTROL	NEUN	Medulla	CERE+BS	yes	control_20	Human Brain Collection Core (HBCC, NIH)	0.31	309784	421	8
CONTROL	NEUN	Frontal Cortex	Cortex	yes	control_20	Human Brain Collection Core (HBCC, NIH)	0.42	1700000	1648	8
CONTROL	NEUN	Temporal Cortex	Cortex	yes	control_20	Human Brain Collection Core (HBCC, NIH)	0.36	2200000	3181	8
CONTROL	NEUN	Hippocampus	HIP	yes	control_20	Human Brain Collection Core (HBCC, NIH)	0.6	867906	979	8
CONTROL	NEUN	Amygdala	HIP	yes	control_20	Human Brain Collection Core (HBCC, NIH)	0.46	279000	247	8
CONTROL	PU1	Pons	CERE+BS	yes	control_20	Human Brain Collection Core (HBCC, NIH)	0.41	250157	190	8
CONTROL	PU1	Midbrain	CERE+BS	yes	control_20	Human Brain Collection Core (HBCC, NIH)	0.43	289066	456	8
CONTROL	PU1	Medulla	CERE+BS	yes	control_20	Human Brain Collection Core (HBCC, NIH)	0.31	345006	587	8
CONTROL	PU1	Frontal Cortex	Cortex	yes	control_20	Human Brain Collection Core (HBCC, NIH)	0.42	405000	546	8
CONTROL	PU1	Temporal Cortex	Cortex	yes	control_20	Human Brain Collection Core (HBCC, NIH)	0.36	390612	500	8
CONTROL	PU1	Hippocampus	HIP	yes	control_20	Human Brain Collection Core (HBCC, NIH)	0.6	152589	159	8
CONTROL	PU1	Amygdala	HIP	yes	control_20	Human Brain Collection Core (HBCC, NIH)	0.46	345689	407	8
CONTROL	PU1	Inferior Parietal Gyrus	Cortex	yes	control_14	Netherlands Brain Bank	0.67	120055	146.713	8
CONTROL	PU1	Superior Parietal Cortex	Cortex	yes	control_14	Netherlands Brain Bank	0.26	100500	128	8
CONTROL	DN	Superior Parietal Cortex	Cortex	no	control_15	Netherlands Brain Bank	0.27	320590	575	8
CONTROL	NEUN	Superior Parietal Cortex	Cortex	no	control_15	Netherlands Brain Bank	0.27	706528	634	8
CONTROL	Blood	Blood	Blood	yes	control_19	Human Brain Collection Core (HBCC, NIH)			9367	8
CONTROL	DN	Medulla	CERE+BS	yes	control_19	Human Brain Collection Core (HBCC, NIH)	0.65	538906	584	8
CONTROL	DN	Midbrain	CERE+BS	yes	control_19	Human Brain Collection Core (HBCC, NIH)	0.37	790660	917	8
CONTROL	DN	Pons	CERE+BS	yes	control_19	Human Brain Collection Core (HBCC, NIH)	0.45	1678537	2130	8
CONTROL	DN	Temporal Cortex	Cortex	yes	control_19	Human Brain Collection Core (HBCC, NIH)	0.46	1676009	1348	8
CONTROL	DN	Frontal Cortex	Cortex	yes	control_19	Human Brain Collection Core (HBCC, NIH)	0.51	1337890	987	8
CONTROL	DN	Hippocampus	HIP	yes	control_19	Human Brain Collection Core (HBCC, NIH)	0.27	658345	770	8
CONTROL	DN	Amygdala	HIP	yes	control_19	Human Brain Collection Core (HBCC, NIH)	0.58	386775	496	8
CONTROL	NEUN	Midbrain	CERE+BS	yes	control_19	Human Brain Collection Core (HBCC, NIH)	0.37	106734	111	8
CONTROL	NEUN	Medulla	CERE+BS	yes	control_19	Human Brain Collection Core (HBCC, NIH)	0.605	115064	184	8
CONTROL	NEUN	Pons	CERE+BS	yes	control_19	Human Brain Collection Core (HBCC, NIH)	0.45	340654	297	8
CONTROL	NEUN	Temporal Cortex	Cortex	yes	control_19	Human Brain Collection Core (HBCC, NIH)	0.46	1300000	995	8
CONTROL	NEUN	Frontal Cortex	Cortex	yes	control_19	Human Brain Collection Core (HBCC, NIH)	0.51	122001	148	8
CONTROL	NEUN	Amygdala	HIP	yes	control_19	Human Brain Collection Core (HBCC, NIH)	0.58	754902	884	8
CONTROL	NEUN	Hippocampus	HIP	yes	control_19	Human Brain Collection Core (HBCC, NIH)	0.27	478098	538	8
CONTROL	PU1	Midbrain	CERE+BS	yes	control_19	Human Brain Collection Core (HBCC, NIH)	0.37	558044	662	8
CONTROL	PU1	Medulla	CERE+BS	yes	control_19	Human Brain Collection Core (HBCC, NIH)	0.605	321301	527	8
CONTROL	PU1	Pons	CERE+BS	yes	control_19	Human Brain Collection Core (HBCC, NIH)	0.45	678903	554	8
CONTROL	PU1	Frontal Cortex	Cortex	yes	control_19	Human Brain Collection Core (HBCC, NIH)	0.51	126503	172	8
CONTROL	PU1	Temporal Cortex	Cortex	yes	control_19	Human Brain Collection Core (HBCC, NIH)	0.46	60678	66	8
CONTROL	PU1	Amygdala	HIP	yes	control_19	Human Brain Collection Core (HBCC, NIH)	0.58	157897	158	8
CONTROL	PU1	Hippocampus	HIP	yes	control_19	Human Brain Collection Core (HBCC, NIH)	0.27	156589	197	8
CONTROL	Blood	Blood	Blood	yes	control_18	Human Brain Collection Core (HBCC, NIH)			12678	8
CONTROL	DN	Pons	CERE+BS	yes	control_18	Human Brain Collection Core (HBCC, NIH)	0.87	577005	461.97	8
CONTROL	DN	Medulla	CERE+BS	yes	control_18	Human Brain Collection Core (HBCC, NIH)	0.29	199030	235	8
CONTROL	DN	Midbrain	CERE+BS	yes	control_18	Human Brain Collection Core (HBCC, NIH)	0.36	347678	378	8
CONTROL	DN	Temporal Cortex	Cortex	yes	control_18	Human Brain Collection Core (HBCC, NIH)	1.06	857993	1102.71	8
CONTROL	DN	Temporal Cortex	Cortex	yes	control_18	Human Brain Collection Core (HBCC, NIH)	1.06	437546	924.47	8
CONTROL	DN	Amygdala	HIP	yes	control_18	Human Brain Collection Core (HBCC, NIH)	0.94	1221066	1374.29	8
CONTROL	NEUN	Midbrain	CERE+BS	yes	control_18	Human Brain Collection Core (HBCC, NIH)	0.36	376000	418	8
CONTROL	NEUN	Pons	CERE+BS	yes	control_18	Human Brain Collection Core (HBCC, NIH)	0.87	748777	1733.54	8
CONTROL	NEUN	Medulla	CERE+BS	yes	control_18	Human Brain Collection Core (HBCC, NIH)	0.29	149044	110	8
CONTROL	NEUN	Frontal Cortex	Cortex	yes	control_18	Human Brain Collection Core (HBCC, NIH)	1.03	1487832	1094.88	8
CONTROL	NEUN	Temporal Cortex	Cortex	yes	control_18	Human Brain Collection Core (HBCC, NIH)	1.06	156704	123.26	8
CONTROL	NEUN	Amygdala	HIP	yes	control_18	Human Brain Collection Core (HBCC, NIH)	0.94	847533	532.5	8
CONTROL	PU1	Midbrain	CERE+BS	yes	control_18	Human Brain Collection Core (HBCC, NIH)	0.36	1230705	893	8
CONTROL	PU1	Pons	CERE+BS	yes	control_18	Human Brain Collection Core (HBCC, NIH)	0.87	285044	152.16	8
CONTROL	PU1	Medulla	CERE+BS	yes	control_18	Human Brain Collection Core (HBCC, NIH)	0.29	163610	122	8
CONTROL	PU1	Frontal Cortex	Cortex	yes	control_18	Human Brain Collection Core (HBCC, NIH)	1.03	301005	265.62	8
CONTROL	PU1	Temporal Cortex	Cortex	yes	control_18	Human Brain Collection Core (HBCC, NIH)	1.03	1016000	1010.53	8
CONTROL	PU1	Amygdala	HIP	yes	control_18	Human Brain Collection Core (HBCC, NIH)	0.94	417500	379.21	8
CONTROL	PU1	Superior Parietal Cortex	Cortex	no	control_15	Netherlands Brain Bank	0.27	115033	153	8
CONTROL	DN	Angular Gyrus (Parietal Lobe)	Cortex	no	control_16	Netherlands Brain Bank	0.56	689406	700	8
CONTROL	NEUN	Angular Gyrus (Parietal Lobe)	Cortex	no	control_16	Netherlands Brain Bank		1586707	1720	8
CONTROL	PU1	Angular Gyrus (Parietal Lobe)	Cortex	no	control_16	Netherlands Brain Bank	0.56	185679	203	8
CONTROL	DN	Angular Gyrus (Parietal Lobe)	Cortex	no	control_17	Netherlands Brain Bank	0.57	278453	356.7	8
CONTROL	DN	Superior Parietal Cortex	Cortex	no	control_17	Netherlands Brain Bank	0.6	1457833	1493	8
CONTROL	NEUN	Angular Gyrus (Parietal Lobe)	Cortex	no	control_17	Netherlands Brain Bank	0.57	378956	406.6	8
CONTROL	NEUN	Superior Parietal Cortex	Cortex	no	control_17	Netherlands Brain Bank	0.6	1844055	1777	8
CONTROL	PU1	Angular Gyrus (Parietal Lobe)	Cortex	no	control_17	Netherlands Brain Bank	0.57	148973	116.3	8
CONTROL	PU1	Superior Parietal Cortex	Cortex	no	control_17	Netherlands Brain Bank	0.6	182690	285	8
CONTROL	DN	Superior Parietal Cortex	Cortex	no	control_2	Netherlands Brain Bank	0.41	518800	507.26	8
CONTROL	NEUN	Superior Parietal Cortex	Cortex	no	control_2	Netherlands Brain Bank	0.41	1537500	2529.77	8
CONTROL	PU1	Superior Parietal Cortex	Cortex	no	control_2	Netherlands Brain Bank	0.41	89101	38.37	8
CONTROL	PU1	Supramarginal Gyrus (Parietal lobe)	Cortex	no	control_2	Netherlands Brain Bank	0.2	50712	119	8
CONTROL	DN	Angular Gyrus (Parietal Lobe)	Cortex	no	control_3	Netherlands Brain Bank	0.44	539242	599	8
CONTROL	DN	Supramarginal Gyrus (Parietal lobe)	Cortex	no	control_3	Netherlands Brain Bank	0.2	318056	393	8
CONTROL	NEUN	Angular Gyrus (Parietal Lobe)	Cortex	no	control_3	Netherlands Brain Bank	0.44	593228	323	8
CONTROL	NEUN	Supramarginal Gyrus (Parietal lobe)	Cortex	no	control_3	Netherlands Brain Bank	0.2	273000	537	8
CONTROL	PU1	Angular Gyrus (Parietal Lobe)	Cortex	no	control_3	Netherlands Brain Bank	0.44	56512	42	8
CONTROL	DN	Angular Gyrus (Parietal Lobe)	Cortex	no	control_5	Netherlands Brain Bank	0.26	180590	75.13	8
CONTROL	NEUN	Angular Gyrus (Parietal Lobe)	Cortex	no	control_5	Netherlands Brain Bank	0.26	358174	416.56	8
CONTROL	PU1	Angular Gyrus (Parietal Lobe)	Cortex	no	control_5	Netherlands Brain Bank	0.26	41711	50.79	8
CONTROL	Blood	Blood	Blood	yes	control_6	Netherlands Brain Bank			1578.05	8
CONTROL	DN	Angular Gyrus (Parietal Lobe)	Cortex	yes	control_6	Netherlands Brain Bank	0.43	1308467	1176	8
CONTROL	DN	Supramarginal Gyrus (Parietal lobe)	Cortex	yes	control_6	Netherlands Brain Bank	0.71	648006	488	8
CONTROL	NEUN	Angular Gyrus (Parietal Lobe)	Cortex	yes	control_6	Netherlands Brain Bank	0.43	1748926	1838	8
CONTROL	NEUN	Supramarginal Gyrus (Parietal lobe)	Cortex	yes	control_6	Netherlands Brain Bank	0.71	598000	297	8
CONTROL	PU1	Supramarginal Gyrus (Parietal lobe)	Cortex	yes	control_6	Netherlands Brain Bank	0.71	61222	123	8
CONTROL	PU1	Angular Gyrus (Parietal Lobe)	Cortex	yes	control_6	Netherlands Brain Bank	0.43	189745	262	8
CONTROL	Blood	Blood	Blood	yes	control_7	Netherlands Brain Bank			396.36	8
CONTROL	DN	Angular Gyrus (Parietal Lobe)	Cortex	yes	control_7	Netherlands Brain Bank	0.82	1332699	453.59	8
CONTROL	DN	Inferior Parietal Gyrus	Cortex	yes	control_7	Netherlands Brain Bank	0.62	1485543	1130.52	8
CONTROL	NEUN	Inferior Parietal Gyrus	Cortex	yes	control_7	Netherlands Brain Bank	0.62	1702320	1382.07	8
CONTROL	NEUN	Angular Gyrus (Parietal Lobe)	Cortex	yes	control_7	Netherlands Brain Bank	0.82	1974760	3159.88	8
CONTROL	PU1	Inferior Parietal Gyrus	Cortex	yes	control_7	Netherlands Brain Bank	0.62	211500	177.58	8
CONTROL	PU1	Angular Gyrus (Parietal Lobe)	Cortex	yes	control_7	Netherlands Brain Bank	0.82	177597	133.14	8
CONTROL	Blood	Blood	Blood	yes	control_8	Netherlands Brain Bank			248.46	8
CONTROL	DN	Angular Gyrus (Parietal Lobe)	Cortex	yes	control_8	Netherlands Brain Bank	0.4	498356	711.37	8
CONTROL	NEUN	Superior Parietal Cortex	Cortex	yes	control_8	Netherlands Brain Bank	0.72	514256	1925.42	8
CONTROL	NEUN	Angular Gyrus (Parietal Lobe)	Cortex	yes	control_8	Netherlands Brain Bank	0.4	780430	1682.45	8
CONTROL	PU1	Superior Parietal Cortex	Cortex	yes	control_8	Netherlands Brain Bank	0.72	148166	139.17	8
CONTROL	PU1	Angular Gyrus (Parietal Lobe)	Cortex	yes	control_8	Netherlands Brain Bank	0.4	136500	193.13	8
CONTROL	Blood	Blood	Blood	yes	control_9	Netherlands Brain Bank			202.33	8
CONTROL	DN	Superior Parietal Cortex	Cortex	yes	control_9	Netherlands Brain Bank	0.6	423689	382.28	8
CONTROL	NEUN	Superior Parietal Cortex	Cortex	yes	control_9	Netherlands Brain Bank	0.6	1742440	1291.72	8
CONTROL	PU1	Superior Parietal Cortex	Cortex	yes	control_9	Netherlands Brain Bank	0.6	80940	83.34	8
CONTROL	Blood	Blood	Blood	yes	control _40	Memorial Sloan Kettering			3119	8
CONTROL	DN	Parietal Cortex	CERE+BS	yes	control _40	Memorial Sloan Kettering	0.3	351786	489	8
CONTROL	DN	Cerebellum	CERE+BS	yes	control _40	Memorial Sloan Kettering	0.34	450605	448.3	8
CONTROL	DN	Temporal Cortex	Cortex	yes	control _40	Memorial Sloan Kettering	0.25	793678	374.5	8
CONTROL	DN	Occipital Cortex	Cortex	yes	control _40	Memorial Sloan Kettering	0.28	327658	304.8	8
CONTROL	DN	Pons	Cortex	yes	control _40	Memorial Sloan Kettering	0.4	187163	161.1	8
CONTROL	NEUN	Cerebellum	CERE+BS	yes	control _40	Memorial Sloan Kettering	0.34	436886	217	8
CONTROL	NEUN	Parietal Cortex	CERE+BS	yes	control _40	Memorial Sloan Kettering	0.3	510684	480	8
CONTROL	NEUN	Temporal Cortex	Cortex	yes	control _40	Memorial Sloan Kettering	0.25	989872	543.3	8
CONTROL	NEUN	Occipital Cortex	Cortex	yes	control _40	Memorial Sloan Kettering	0.28	1300164	1242.4	8
CONTROL	PU1	Cerebellum	CERE+BS	yes	control _40	Memorial Sloan Kettering	0.34	62013	65.8	8
CONTROL	PU1	Parietal Cortex	CERE+BS	yes	control _40	Memorial Sloan Kettering	0.3	107584	75.1	8
CONTROL	PU1	Occipital Cortex	Cortex	yes	control _40	Memorial Sloan Kettering	0.28	29187	27.8	8
CONTROL	PU1	Temporal Cortex	Cortex	yes	control _40	Memorial Sloan Kettering	0.25	137591	42.1	8
CONTROL	PU1	Pons	Cortex	yes	control _40	Memorial Sloan Kettering	0.4	48743	46.2	8
CONTROL	Blood	Blood	Blood	yes	control _38	Memorial Sloan Kettering			42743.3	8
CONTROL	DN	Cerebellum	CERE+BS	yes	control _38	Memorial Sloan Kettering	0.25	330000	535.9	8
CONTROL	DN	Frontal cortex	Cortex	yes	control _38	Memorial Sloan Kettering	0.2	604590	741.7	8
CONTROL	DN	Parietal Cortex	Cortex	yes	control _38	Memorial Sloan Kettering	0.2	228060	559.5	8
CONTROL	DN	Temporal Cortex	Cortex	yes	control _38	Memorial Sloan Kettering	0.2	630789	727.7	8
CONTROL	NEUN	Cerebellum	CERE+BS	yes	control _38	Memorial Sloan Kettering	0.25	135565	185.9	8
CONTROL	NEUN	Frontal cortex	Cortex	yes	control _38	Memorial Sloan Kettering	0.2	646340	739.1	8
CONTROL	NEUN	Temporal Cortex	Cortex	yes	control _38	Memorial Sloan Kettering	0.2	363699	426.7	8
CONTROL	NEUN	Parietal Cortex	Cortex	yes	control _38	Memorial Sloan Kettering	0.2	208646	360.8	8
CONTROL	PU1	Cerebellum	CERE+BS	yes	control _38	Memorial Sloan Kettering	0.25	140987	272.8	8
CONTROL	PU1	Frontal cortex	Cortex	yes	control _38	Memorial Sloan Kettering	0.2	356512	355.8	8
CONTROL	PU1	Temporal Cortex	Cortex	yes	control _38	Memorial Sloan Kettering	0.2	123022	260.7	8
CONTROL	PU1	Parietal Cortex	Cortex	yes	control _38	Memorial Sloan Kettering	0.2	189000	376.2	8

## Sheet: Table S1_Patient information
CODE	HIP, Blood	sex	age	age. Matched with AD	Brain Bank	braak	amyloid	apoe	braaklb	pmd	ph	weight	csf	diagnosis/cause of death	Tissues analyzed
AD18	AD	Male	67		Netherlands Brain Bank	5	B	44		05:22	6.16	1115	55	AD. with congo. angiopathy	HIP, SPG, Blood
AD19	AD	Female	69		Netherlands Brain Bank	5	C	44		03:50	6.48	1211	75	Alz. dis. / Lewy bodies variant	HIP, SPG, Blood
AD20	AD	Male	54		Netherlands Brain Bank	6	C	43		10:10	6.51	1244	90	Alz. dis. / Lewy bodies variant	HIP, SPG
AD21	AD	Female	62		Netherlands Brain Bank	6	C	43		04:45	6.37	912	80	Alzheimer's disease	HIP, SPG, Blood		Brain region code
AD22	AD	Female	66		Netherlands Brain Bank	6	C	42		06:55	6.35	804	170	Alz. dis. / Lewy bodies variant	HIP, SPG, Blood		SPG	Superior Parietal Gyrus
AD23	AD	Female	68		Netherlands Brain Bank	6	C	32		03:50	6.50	985	110	Alzheimer's disease	HIP, SPG, Blood		SMG	Supramarginal Gyrus
AD24	AD	Female	70		Netherlands Brain Bank	6	C	43		04:20	6.74	843	55	Alz. dis. / Lewy bodies variant	HIP, SPG, Blood		PC	Parietal Cortex
AD25	AD	Male	65		Netherlands Brain Bank	6	B	33		05:40	6.30	1009	70	Alz. dis. / Lewy bodies variant	HIP, SPG, Blood		TC	Temporal Cortex
AD26	AD	Female	67		Netherlands Brain Bank	6	C	32		06:05	6.39	1123	140	Alzheimer's disease	HIP, SPG, Blood		OC	Occipital Cortex
AD27	AD	Male	68		Netherlands Brain Bank	6	C	33		06:30	6.27	1110	190	Alz. dis. / Lewy bodies variant	HIP, SPG, Blood		AG	Angular Gyrus
AD28	AD	Female	57		Netherlands Brain Bank	6	C	43		05:40	6.45	1020	120	Alzheimer's disease	HIP, SPG, Blood		IPG	Inferior Parietal Gyrus
AD29	AD	Male	68		Netherlands Brain Bank	6	C	43		05:20	6.53	1100	100	Alzheimer's disease	HIP, SPG		HIP	Hippocampus
AD30	AD	Female	60		Netherlands Brain Bank	5	C	33	2	04:15	6.41	1073	65	Alzheimer's disease, DOWN Syndrome	HIP, SPG, Blood		FC	Frontal Cortex
AD31	AD	Female	54		Netherlands Brain Bank	6	C	43		06:35	6.37	867	160	Alzheimer's disease, AD! mosaic trisomy 21	HIP, SPG, Blood
AD32	AD	Female	59		Netherlands Brain Bank	5	C	44		04:20	6.50	1060	50	Alzheimer's disease, meningioma	HIP, SPG, Blood
AD33	AD	Male	68		Netherlands Brain Bank	6	C	44	5	04:50	6.50	1016	22	Alz. dis. / Lewy bodies variant. alpha-synucleïnopathie, congophilic angiopathy	HIP, SPG, Blood
AD34	AD	Male	59		Netherlands Brain Bank	5	C	43	4	04:15	6.36	1260	130	Alz. dis. / Lewy bodies variant	HIP, SPG
AD35	AD	Male	67		Netherlands Brain Bank	6	C	44	4	09:20	6.27	1020	10	Alz. dis. / Lewy bodies variant	HIP, SPG, Blood
AD36	AD	Male	64		Netherlands Brain Bank	6	C	44		04:55	6.35	1070	155	AD with some Lewy bodies	HIP, SPG, Blood
AD37	AD	Male	69		Netherlands Brain Bank	4	C	43	6	04:45	6.30	1240	25	Alz. dis. / Lewy bodies variant	HIP, SPG, Blood
AD38	AD	Female	62		Netherlands Brain Bank	6	C	43	6	06:15	6.28	1020	180	Alz. dis. / Lewy bodies variant	HIP, SPG
AD39	AD	Male	65		Netherlands Brain Bank	6	C	43		06:00	6.40	1254	60	Alzheimer's disease	HIP, Blood
AD40	AD	Female	57		Netherlands Brain Bank	6	C	43		05:45	6.57	960	25	Alzheimer's disease	HIP, SPG, Blood
AD41	AD	Female	64		Netherlands Brain Bank	4	C	44		08:05	6.44	1308	5	AD. with congo. angiopathy	HIP, SPG, Blood
AD42	AD	Male	66		Netherlands Brain Bank	6	C	32		07:00	5.99	1130	135	AD. with congo. angiopathy	HIP, SPG, Blood
AD43	AD	Female	68		Netherlands Brain Bank	6	C	43	6	03:30	6.02	898	200	Alz. dis. / Lewy bodies variant	HIP, SPG, Blood
AD44	AD	Male	67		Netherlands Brain Bank	6	C	33	4	03:45	6.37	973	45	Alz. dis. / Lewy bodies variant	HIP, SPG, Blood
AD45	AD	Female	61		Netherlands Brain Bank	6	C	44	0	05:10	6.23	1020	140	Alzheimer's disease	HIP, SPG, Blood
AD46	AD	Female	63		Netherlands Brain Bank	6	C	43		07:10	6.64	1055	25	Alzheimer's disease	HIP, SPG, Blood
AD47	AD	Female	64		Netherlands Brain Bank	6	C	33		07:10	6.34	860	125	AD with some Lewy bodies	HIP, SPG, Blood
AD48	AD	Female	65		Netherlands Brain Bank	5	C	43		04:30	6.25	904	130	AD with some Lewy bodies, alpha-synnucleinopathy	HIP, SPG, Blood
AD49	AD	Female	69		Netherlands Brain Bank	6	C	32	4	05:45	6.15	1120	70	AD with some Lewy bodies	HIP, SPG, Blood
AD50	AD	Female	70		Netherlands Brain Bank	6	C	33	5	05:15	6.62	1117	30	Alz. dis. / Lewy bodies variant	HIP, SPG, Blood
AD51	AD	Male	63		Netherlands Brain Bank	4	C	44	6	04:55	6.78	1255	48	Alz. dis. / Lewy bodies variant	HIP, SPG, Blood
AD52	AD	Male	67		Netherlands Brain Bank	5	C	44	6	05:20	6.67	1355	30	Alz. dis. / Lewy bodies variant, spongiosis; caa; ARTAG. Family history	HIP, SPG, Blood
AD53	AD	Male	68		Netherlands Brain Bank	6	C	33		06:10	6.64	1020	15	Alzheimer's disease, Thal fase 5 amyloïd beta; LBD amygdala predominance	HIP, SPG, Blood
AD54	AD	Female	66		Netherlands Brain Bank	6	C	33	0	06:45	6.27	890	100	Alzheimer's disease, Thal stadium at least 4 / 5; cerebral amyloïd angiopathy	HIP, SPG, Blood
AD55	AD	Female	66		Netherlands Brain Bank	6	C	32		04:12	6.47	915	200	Alzheimer's disease	HIP, SPG
AD56	AD	Male	56		Netherlands Brain Bank	5	C	43	6	05:00	6.20	1175	55	Alz. dis. / Lewy bodies variant	HIP, SPG, Blood
AD57	AD	Male	69		Netherlands Brain Bank	5	C	43		05:25	6.35	1180	30	AD. with congo. Angiopathy, severe cerebral amyloid angiopathy type 1, caa 3 / 3; atypical tauopathy less severe in hippocampus	HIP, SPG, Blood
AD58	AD	Female	67		Netherlands Brain Bank	6	C	43	4	04:30	6.56	1100	145	Alz. dis. / Lewy bodies variant	HIP, SPG
AD59	AD	Male	64		Netherlands Brain Bank	6	C	33	6	08:15	6.65	1300	50	Alz. dis. / Lewy bodies variant, Biparietal Alzheimer's disease (Benson Syndroom)	HIP, SPG, Blood
AD60	AD	Female	68		Netherlands Brain Bank	6	C	43		05:00	6.46	835	170	Alzheimer's disease	HIP, SPG, Blood
AD61	AD	Female	92		Neuro-CEB, Hôpital de la Pitié-Salpêtrière	2	C	33		21				AD	FC, OC, Caudate nucleus
AD62	AD	Male	82		Neuro-CEB, Hôpital de la Pitié-Salpêtrière	2	C	33		63				AD amyloid angiopathy	FC, OC, Caudate nucleus
control _41	CONTR	Female	81	YES	Netherlands Brain Bank	na		33						Ta-LG UC, bladder cancer	PC, Cerebellum, Brainstem, Blood
control_1	CONTR	Male	45	NO	Netherlands Brain Bank	0		33		08:50	6.71	1440	0	carcinoma	SMG, AG, Blood
control_10	CONTR	Male	74	YES	Netherlands Brain Bank	0		32	0	08:00	6.75	1317	0	myocardial infarction.	SPG, Blood
control_11	CONTR	Female	54	NO	Netherlands Brain Bank	0	O	33		08:00	6.45	1247	10	Breast carcinoma, metastasis, renal failure	AG, SPG, Blood
control_12	CONTR	Female	68	YES	Netherlands Brain Bank	1	O	33		05:45	6.89	1174	20	lung carcinoma, septic shock	AG, SPG, Blood
control_13	CONTR	Male	73	YES	Netherlands Brain Bank	1	A	32	0	06:00	6.44	1352	40	Coloncarcinoma with livermetastases	AG, Blood
control_14	CONTR	Female	69	YES	Netherlands Brain Bank	1		33	0	08:30	na	1074	0	Myocardial infarction	IPG, SPG, Blood
control_15	CONTR	Female	70	YES	Netherlands Brain Bank	1		33		10:30	na	1157	0	Breast carcinoma	SPG, Blood
control_16	CONTR	Female	65	YES	Netherlands Brain Bank	1		33		12:50	6.94	910	120	Cardiac arrest	AG, Blood
control_17	CONTR	Female	55	NO	Netherlands Brain Bank	0		43	0	05:35	na	1363	0	Intracerebral bleeding, fusiform aneurysm of the left medial cerebral artery	AG, SPG, Blood
control_18	CONTR	Male	74	YES	Human Brain Collection Core (HBCC, NIH)	na		43						drowning	TC, Amygdala, Midbrain, Medulla, Pons, Blood
control_19	CONTR	Male	30	NO	Human Brain Collection Core (HBCC, NIH)	na		32						Non-dementia	FC, TC, HIP, Pons, Amygdala, Midbrain, Medulla, Blood
control_2	CONTR	Female	74	YES	Netherlands Brain Bank	0		33		05:35	7.04	942	40	Mesenterial thrombosis.Epilepsy since childhood. gliosis in cortex, neuronal loss and gliosis in Thalamus	SPG
control_20	CONTR	Female	2	NO	Human Brain Collection Core (HBCC, NIH)	na		43						drowning	FC, TC, Amygdala, HIP, Midbrain, Pons, Medulla, Blood
control_21	CONTR	Female	71	YES	Memorial Sloan Kettering	na		33						BRAFV600E Colorectal cancer	FC, HIP, Blood
control_22	CONTR	Male	20	NO	Memorial Sloan Kettering	na		33						Sarcoma cancer	FC, HIP, Blood
control_23	CONTR	Male	0	NO	Sant Joan de Déu	na		33						Diaphragmatic Hernia	PC, TC, FC, HIP, Blood
control_24	CONTR	Female	6	NO	Memorial Sloan Kettering	na		na						Rhabdomyosarcoma li-Fraumeni	FC, Choroid Plexus, Blood
control_25	CONTR	Female	17	NO	Memorial Sloan Kettering	na		na						Sarcoma	FC, TC, Cerebellum, Brainstem, Blood
control_26	CONTR	Female	52	NO	Neuro-CEB, Hôpital de la Pitié-Salpêtrière	na		43		29				Non-dementia	Caudate nucleus, OC, FC, Blood
control_27	CONTR	Male	0	NO	Sant Joan de Déu	na		44						Diaphragmatic Hernia	PC, TC, FC, Cerebellum, HIP, Blood
control_28	CONTR	Male	0	NO	Sant Joan de Déu	na		na						Diaphragmatic Hernia	FC, PC, Cerebellum, Blood
control_29	CONTR	Male	69	YES	Neuro-CEB, Hôpital de la Pitié-Salpêtrière	na		44		6				Non-dementia	Cerebellum, FC, Caudate nucleus, OC, Blood
control_3	CONTR	Male	63	YES	Netherlands Brain Bank	0		32		26:45	6.31	1154	0	infection, diabetes	SMG, AG, Blood
control_30	CONTR	Male	73	YES	Memorial Sloan Kettering	na		33						Non-dementia (Mixed small cell/adenocarcinoma of lung)	FC, PC, TC, Cerebellum , Blood
control_31	CONTR	Male	73	YES	Memorial Sloan Kettering	na		33						metastatic bladder cancer	PC, Blood
control_32	CONTR	Female	69	YES	Memorial Sloan Kettering	na		na						ovarian cancer	PC, Blood
control_33	CONTR	Female	67	YES	Memorial Sloan Kettering	na		43						metastatic ER+ right breast cancer	PC (L, R), Midbrain, Brainstem, Pons, FC, TC (L), Cerebellum (L, R), Blood
control_34	CONTR	Male	35	NO	Memorial Sloan Kettering	na		33						Metastatic melanoma	FC, PC, Brainstem, Cerebellum, HIP, Blood
control_35	CONTR	Female	35	NO	Memorial Sloan Kettering	na		32						Metastatic PDAC	FC, TC, PC, Pons, Midbrain, Cerebellum, Blood
control_36	CONTR	Female	20	NO	Memorial Sloan Kettering	na		32						embryonal rhabdomyosarcom	PC, FC , TC, OC, Brainstem, Blood
control_37	CONTR	Female	74	YES	Memorial Sloan Kettering	na		43						invasive lobular CA; ER+, HER, breast cancer	FC, Cerebellum, Blood
control_38	CONTR	Female	67	YES	Memorial Sloan Kettering	na		33						Pancreatic ductal adenocarcinoma	TC, FC, PC, Cerebellum, Blood
control_39	CONTR	Male	64	YES	Memorial Sloan Kettering	na		33						retroperitoneal lipo-sarcoma	PC
control_40	CONTR	Female	76	YES	Memorial Sloan Kettering	na		43						endometrial carcinoma	TC, PC, OC, Cerebellum, Pons, Blood
control_42	CONTR	Male	77	YES	Memorial Sloan Kettering	na		42						metastatic prostate cancer	PC, Spinal Cord, TC, OC, Blood
control_43	CONTR	Female	46	NO	Memorial Sloan Kettering	na		33						metastatic Triple Negative Breast Cancer	PC
control_44	CONTR	Female	69	YES	Memorial Sloan Kettering	na		33						Metastatic poorly differentiated breast cancer	FC, PC, TC, Cerebellum, Blood
control_45	CONTR	Male	74	YES	Memorial Sloan Kettering	na		na						Ta-LG UC, bladder cancer	PC, Cerebellum, Blood
control_5	CONTR	Female	51	NO	Netherlands Brain Bank	0		33		07:40	7.05	1131	25	Carcinoma, infection	AG, Blood
control_6	CONTR	Female	72	YES	Netherlands Brain Bank	1		33		09:10	6.25	1047	20	cardiac failure, abnormal hippocampus. substantial number of vague senile plaques (sp). pyramidal layer and parahippocmapal gyrus show some nft.	SMG, AG, Blood
control_7	CONTR	Male	72	YES	Netherlands Brain Bank	0		33	0	07:25	6.61	1370	0	Lung emphysema	AG, IPG, Blood
control_8	CONTR	Female	63	YES	Netherlands Brain Bank	0		43		06:25	6.67	1181	35	Breast adenocarcinoma	AG, SPG, Blood
control_9	CONTR	Female	73	YES	Netherlands Brain Bank	1		33	0	05:30	6.38	1264	40	diabetes, dysrhtimia	SPG
